# Supplementary material
Source: PubMed Central journal article supplement (PMC3048834)

Supporting Information for

## **Macrocyclic $\beta$ -Sheet Peptides that Inhibit Aggregation of a Tau-Protein-Derived Hexapeptide**

Jing Zheng,<sup>a</sup> Cong Liu,<sup>b</sup> Michael R. Sawaya,<sup>b</sup> Balraju Vadla,<sup>a</sup> Shafiullah Khan,<sup>a</sup> R. Jeremy Woods,<sup>a</sup> David Eisenberg,<sup>b</sup> Warren J. Goux,<sup>c</sup> and James S. Nowick<sup>a\*</sup>

<sup>a</sup>*Department of Chemistry, University of California, Irvine, Irvine, CA 92697-2025;* <sup>b</sup>*Howard Hughes Medical Institute, UCLA-DOE Institute of Genomics and Proteomics, Los Angeles, CA 90095-1570;* <sup>c</sup>*Department of Chemistry, University of Texas at Dallas, Richardson, TX 75080.*

\*To whom correspondence should be addressed: [jsnowick@uci.edu](mailto:jsnowick@uci.edu)

### **Full Citation for Reference 50**

Yu, L. P.; Edalji, R.; Harlan, J. E.; Holzman, T. F.; Lopez, A. P.; Labkovsky, B.; Hillen, H.; Barghorn, S.; Ebert, U.; Richardson, P. L.; Miesbauer, L.; Solomon, L.; Bartley, D.; Walter, K.; Johnson, R. W.; Hajduk, P. J.; Olejniczak, E. T. *Biochemistry* **2009**, *48*, 1870-1877.

**Figures S1 and S2: Two independent experiments, each in triplicate, showing the effect of macrocycle 1a on AcPHF6 aggregation.**

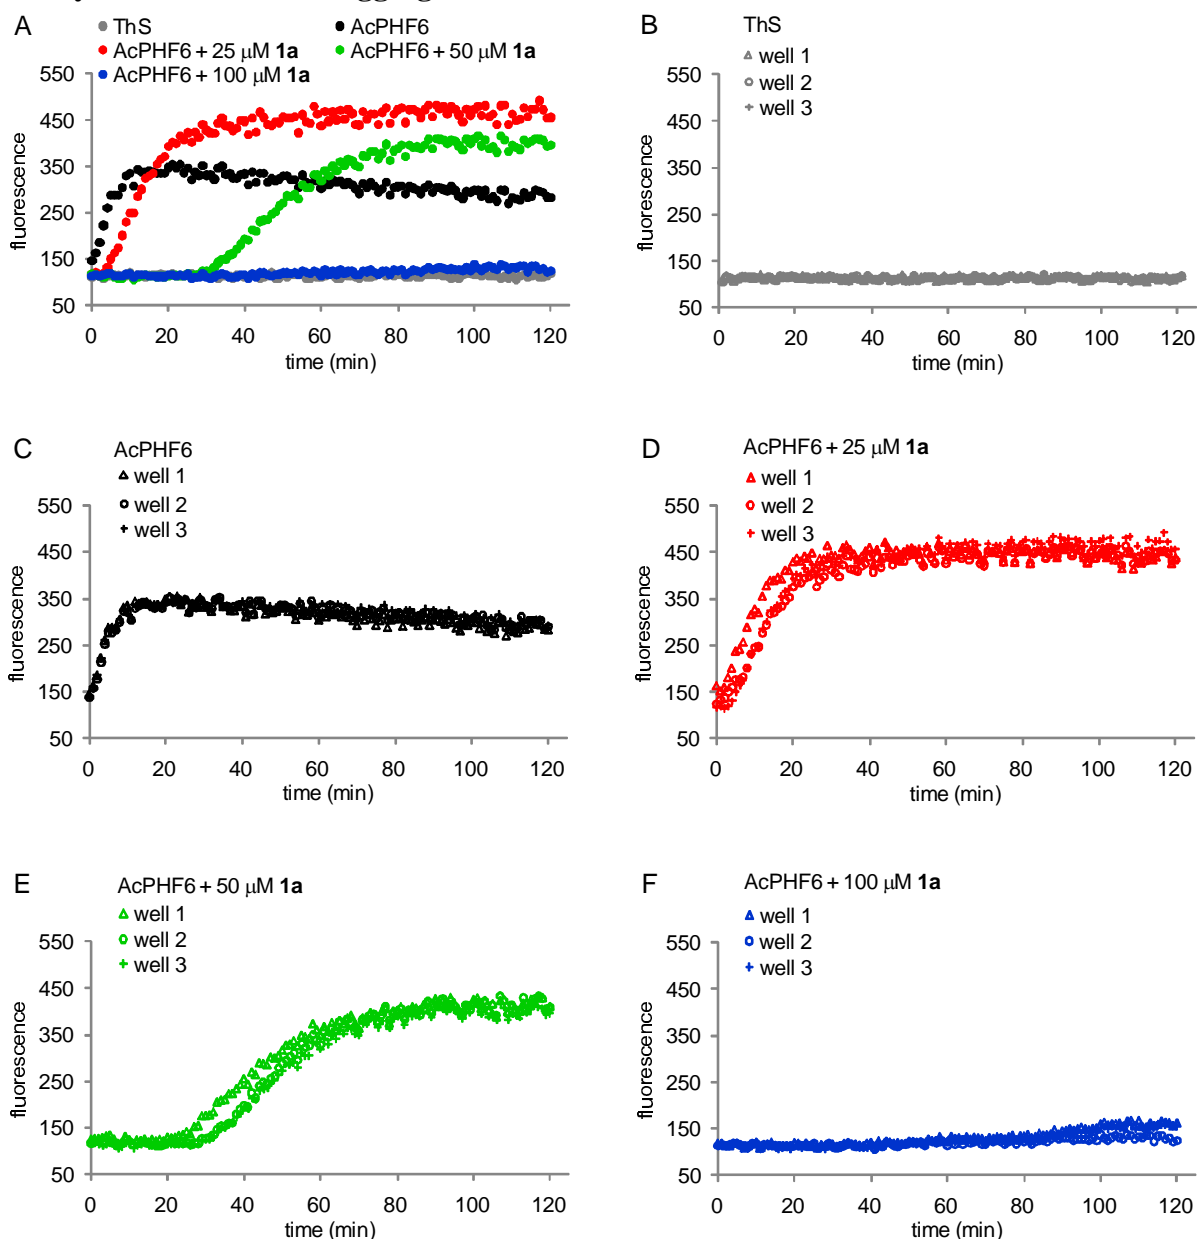

**Figure S1.** AcPHF6 aggregation and inhibition of AcPHF6 measured by ThS fluorescence (Experiment 1). (A) Aggregation of 100  $\mu\text{M}$  AcPHF6 in the absence and presence of 25, 50, and 100  $\mu\text{M}$  of macrocycle 1a (Figure 7B in the paper). (B) Triplicate runs associated with ThS background fluorescence. (C) Triplicate runs associated with aggregation of 100  $\mu\text{M}$  AcPHF6. (D) Triplicate runs associated with aggregation of 100  $\mu\text{M}$  AcPHF6 + 25  $\mu\text{M}$  1a. (E) Triplicate runs associated with aggregation of 100  $\mu\text{M}$  AcPHF6 + 50  $\mu\text{M}$  1a. (F) Triplicate runs associated with aggregation of 100  $\mu\text{M}$  AcPHF6 + 100  $\mu\text{M}$  1a.

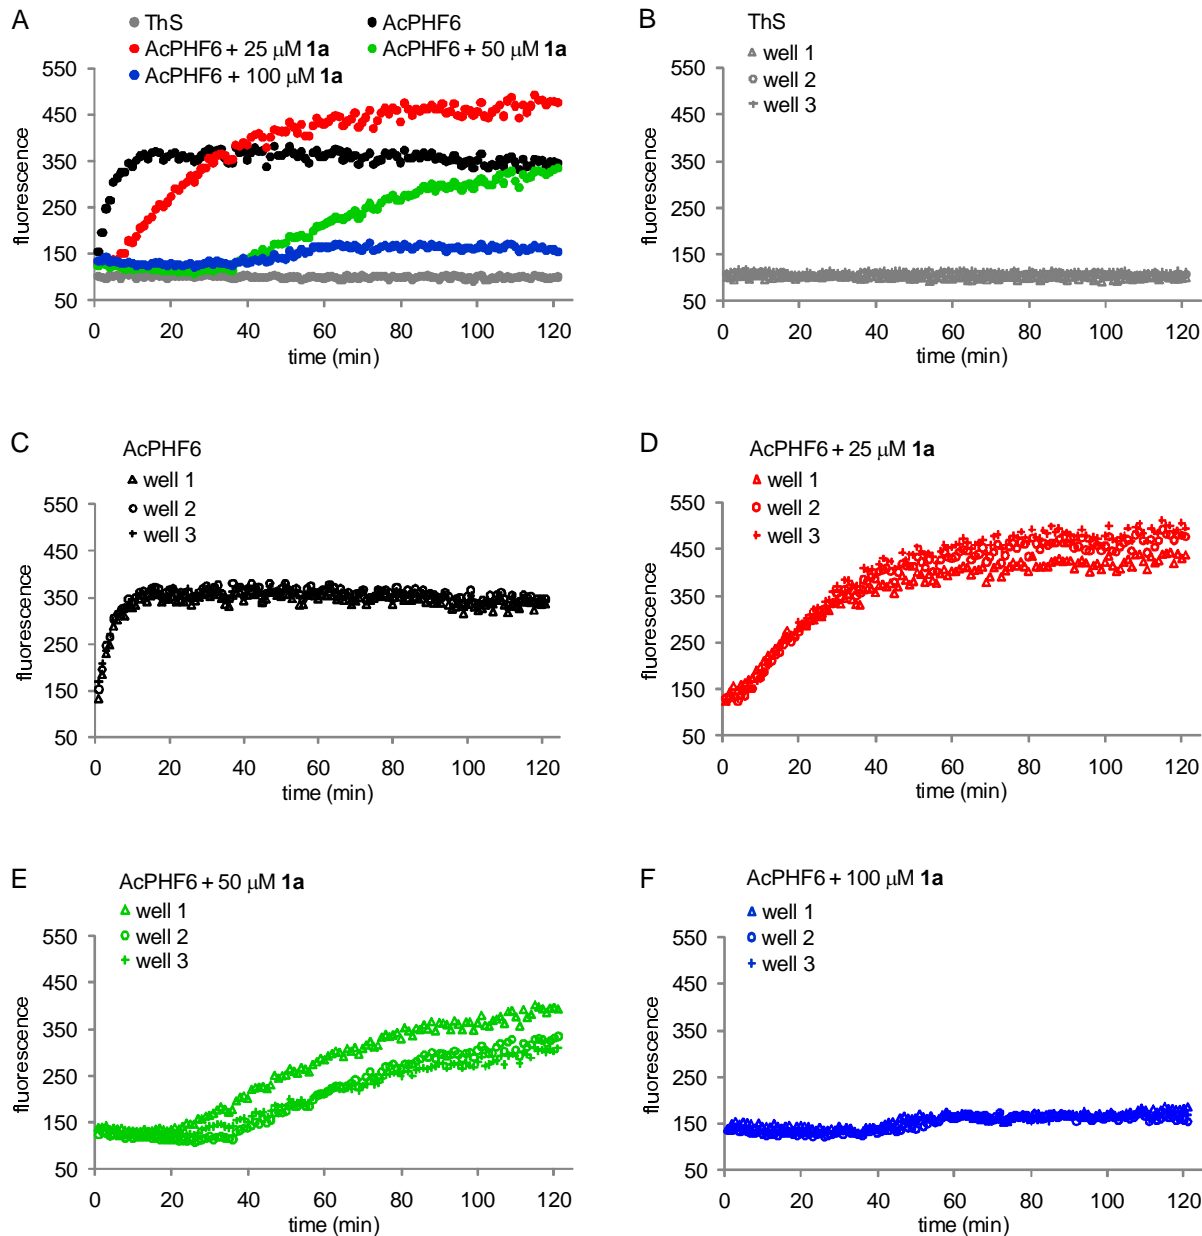

**Figure S2.** AcPHF6 aggregation and inhibition of AcPHF6 measured by ThS fluorescence (Experiment 2). (A) Aggregation of 100  $\mu\text{M}$  AcPHF6 in the absence and presence of 25, 50, and 100  $\mu\text{M}$  of macrocycle **1a**. (B) Triplicate runs associated with ThS background fluorescence. (C) Triplicate runs associated with aggregation of 100  $\mu\text{M}$  AcPHF6. (D) Triplicate runs associated with aggregation of 100  $\mu\text{M}$  AcPHF6 + 25  $\mu\text{M}$  **1a**. (E) Triplicate runs associated with aggregation of 100  $\mu\text{M}$  AcPHF6 + 50  $\mu\text{M}$  **1a**. (F) Triplicate runs associated with aggregation of 100  $\mu\text{M}$  AcPHF6 + 100  $\mu\text{M}$  **1a**.

## <sup>1</sup>H NMR Spectroscopy Experiments

<sup>1</sup>H NMR studies were conducted at 500 MHz (Brüker Avance) or 600 MHz (Brüker Avance). All peptides were studied at 2 mM in D<sub>2</sub>O at 298 K (1D, TOCSY, and ROESY). Macrocycles **1a** and **1c** were also studied at 2 mM in D<sub>2</sub>O at 279 K (1D and ROESY) to facilitate observing the NOE cross-peaks that are close to the HOD peak at 298 K. Peptides **1d**, **1e**, and **2a** were also studied at 2 mM in 9:1 H<sub>2</sub>O/D<sub>2</sub>O at 298 K or 279 K (1D, TOCSY, and ROESY) to obtain sequence-specific assignments of their residues. A 150-ms mixing time was used for TOCSY experiments. A 200- or 250-ms mixing time was used for ROESY experiments. NMR data were processed with the Brüker XWIN-NMR software. Chemical shifts were calibrated with the internal standard DSA.<sup>1</sup>

**Table S1.** Chemical shifts of the  $\alpha$ -protons of R<sub>1</sub>-R<sub>7</sub> of macrocycles **1** and **5** and chemical shifts of the  $\alpha$ -protons of R<sub>1</sub>-R<sub>5</sub> of acyclic peptides **2**.

| peptide   | chemical shifts of the $\alpha$ -protons (ppm) |                |                |                |                |                |                |
|-----------|------------------------------------------------|----------------|----------------|----------------|----------------|----------------|----------------|
|           | R <sub>1</sub>                                 | R <sub>2</sub> | R <sub>3</sub> | R <sub>4</sub> | R <sub>5</sub> | R <sub>6</sub> | R <sub>7</sub> |
| <b>1a</b> | 4.27 (V)                                       | 4.39 (Q)       | 4.12 (I)       | 4.12 (V)       | 4.48 (Y)       | 4.54 (K)       | 4.35 (L)       |
| <b>1b</b> | 4.64 (Q)                                       | 4.09 (I)       | 4.28 (V)       | 4.81 (Y)       | 4.40 (K)       | 4.34 (L)       | 4.51 (K)       |
| <b>1c</b> | 4.43 (V)                                       | 4.44 (Q)       | 4.29 (I)       | 4.27 (V)       | 4.62 (Y)       | 4.56 (L)       | 4.48 (K)       |
| <b>1d</b> | 4.33 (V)                                       | 4.37 (Q)       | 4.17 (I)       | 4.05 (V)       | 4.52 (Y)       | 4.59 (K)       | 4.17 (V)       |
| <b>1e</b> | 4.39 (V)                                       | 4.42 (Q)       | 4.19 (I)       | 4.23 (V)       | 4.57 (Y)       | 4.39 (V)       | 4.42 (K)       |
| <b>1f</b> | 4.30 (V)                                       | 4.41 (Q)       | 4.16 (I)       | 4.15 (V)       | 4.52 (Y)       | 4.60 (R)       | 4.39 (L)       |
| <b>1g</b> | 4.46 (V)                                       | 4.45 (Q)       | 4.32 (I)       | 4.28 (V)       | 4.64 (Y)       | 4.56 (L)       | 4.53 (R)       |
| <b>5a</b> | 4.19 (V)                                       | 4.42 (Q)       | 4.04 (I)       | 4.06 (V)       | 4.49 (Y)       | 4.45 (dK)      | 4.39 (dL)      |
| <b>5c</b> | 4.16 (V)                                       | 4.44 (Q)       | 4.10 (I)       | 4.11 (V)       | 4.53 (Y)       | 4.58 (dL)      | 4.34 (dK)      |
| <b>2a</b> | 4.07 (V)                                       | 4.38 (Q)       | 4.09 (I)       | 4.14 (V)       | 4.41 (Y)       | --             | --             |
| <b>2b</b> | 4.40 (Q)                                       | 4.08 (I)       | 4.07 (V)       | 4.55 (Y)       | 4.15 (K)       | --             | --             |

<sup>1</sup> Nowick, J. S.; Khakshoor, O.; Hashemzadeh, M.; Brower, J. O. *Org. Lett.* **2003**, *5*, 3511-3513.

# Macrocycle 1a, <sup>1</sup>H NMR spectrum, 2 mM in D<sub>2</sub>O with DSA, 25°C, 500 MHz

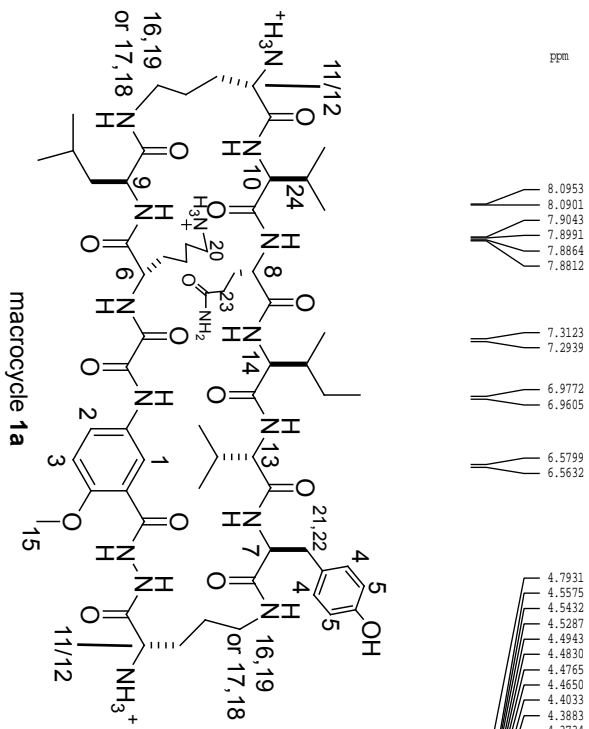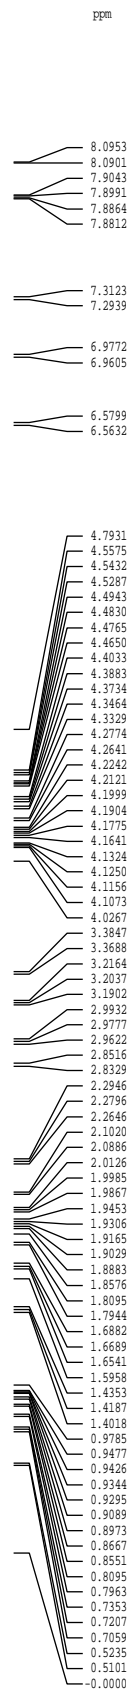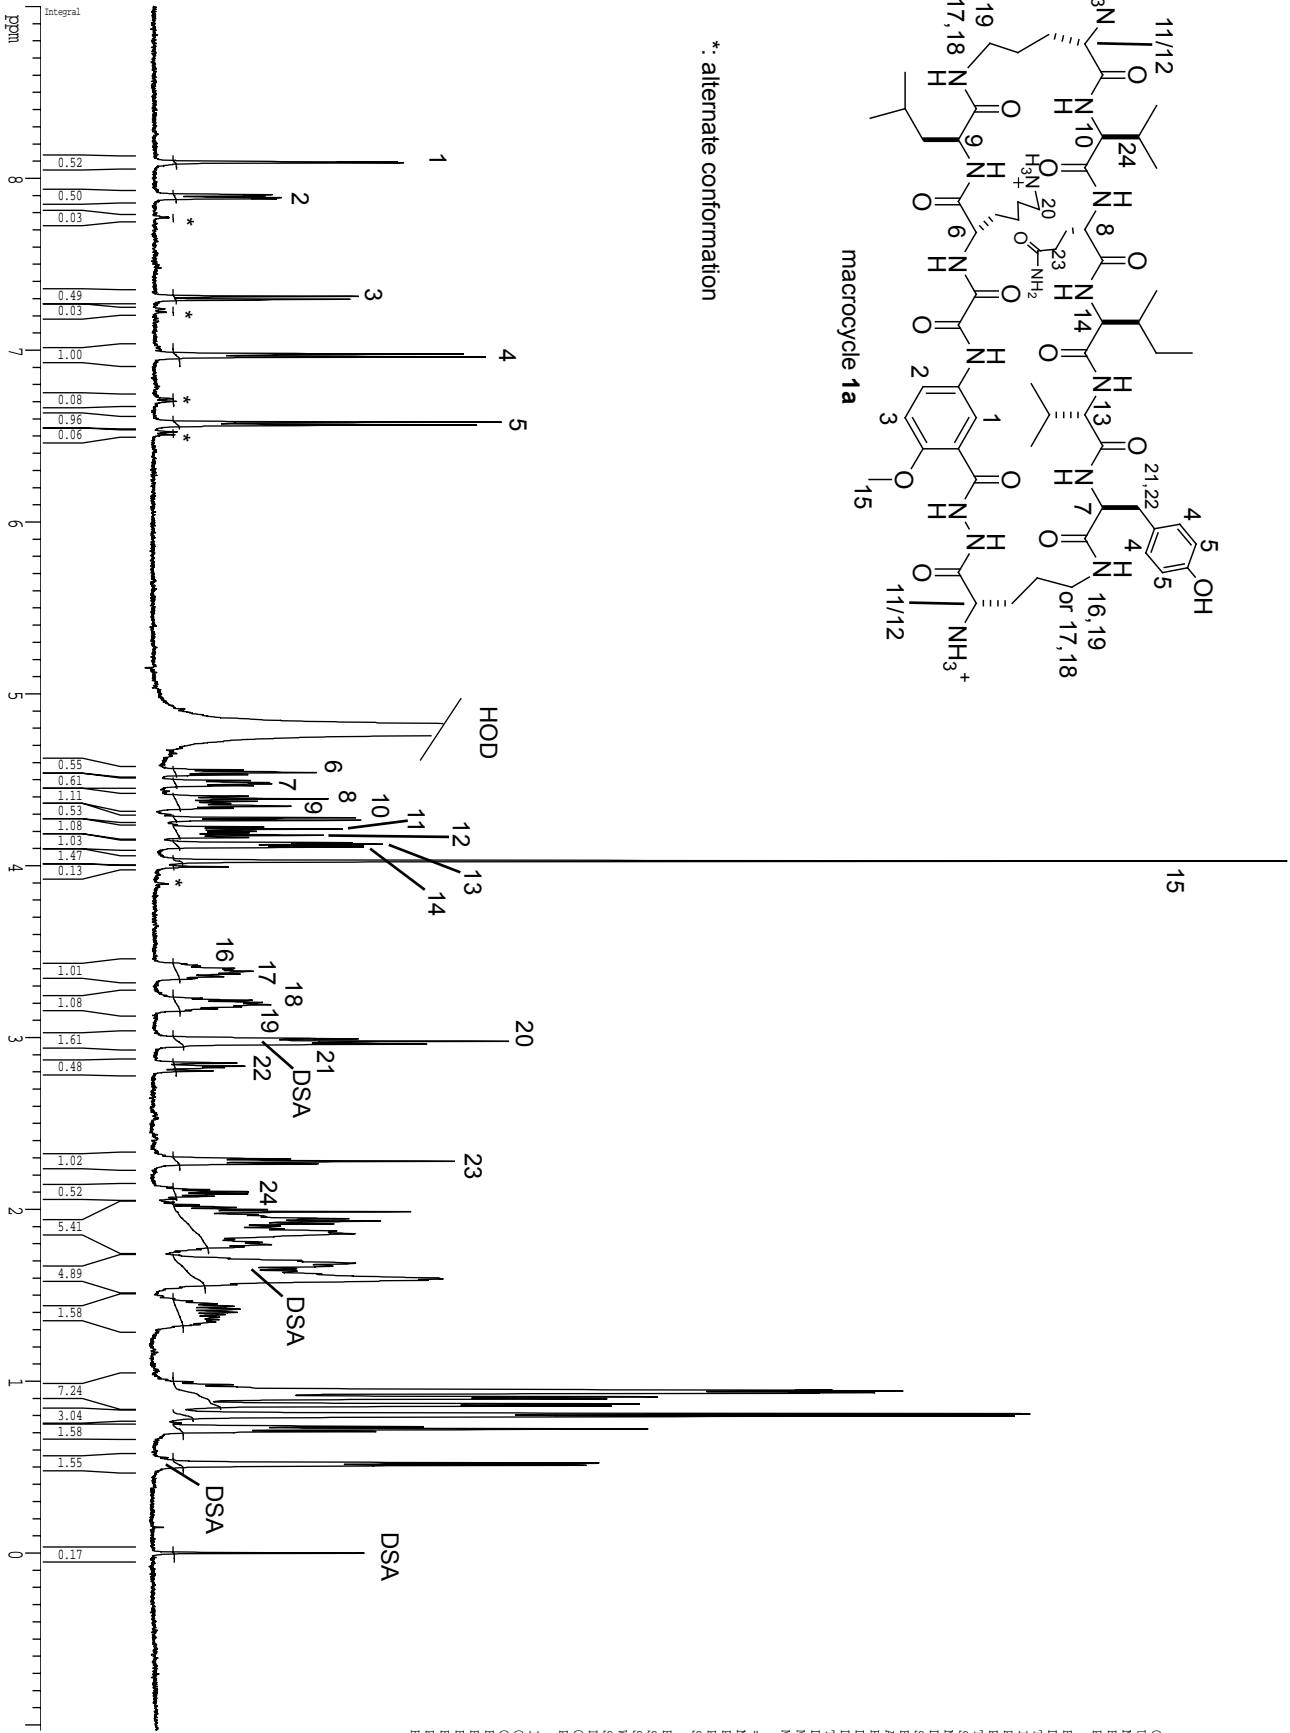

\*: alternate conformation

```

Current Data Parameters
Name      : Z04937
Date_     : 20100111
Time      : 17:20
INSTRUM   : cryo500
PROBHD    : 5 mm CPXI 1H-
PULPROG   : zg30
TD         : 65536
SOLVENT    : D2O
NS         : 2
DS         : 4
SFO1       : 500.136043 Hz
AQ         : 6.3
RG         : 6.3
DE         : 62.400 usec
TE         : 298.0 K
D1         : 0.10000000 sec
KICKERST  : 0.00000000 sec
KICKER    : 0.01500000 sec

===== CHANNEL f1 =====
NUC1       : 1H
P1         : 1.20 usec
PL1        : 0.00 dB
SFO1       : 500.225015 MHz

F2 - Processing parameters
SI         : 65536
SF         : 500.2200100 MHz
WDW        : EM
SSB        : 0
LB         : 0.30 Hz
GB         : 0
PC         : 4.00

JD NMR plot parameters
CX         : 12.00 cm
CY         : 12.00 cm
CZ         : 12.00 cm
RTP        : 9.000 ppm
E1         : 4501.98 Hz
F2P        : -1.029 ppm
F2         : -514.86 Hz
PCKMCM    : 0.43988 ppm/cm
HZCM      : 220.03956 Hz/cm
    
```

# Macrocycle 1a, <sup>1</sup>H NMR spectrum, 2 mM in D<sub>2</sub>O with DSA, 6°C, 600 MHz

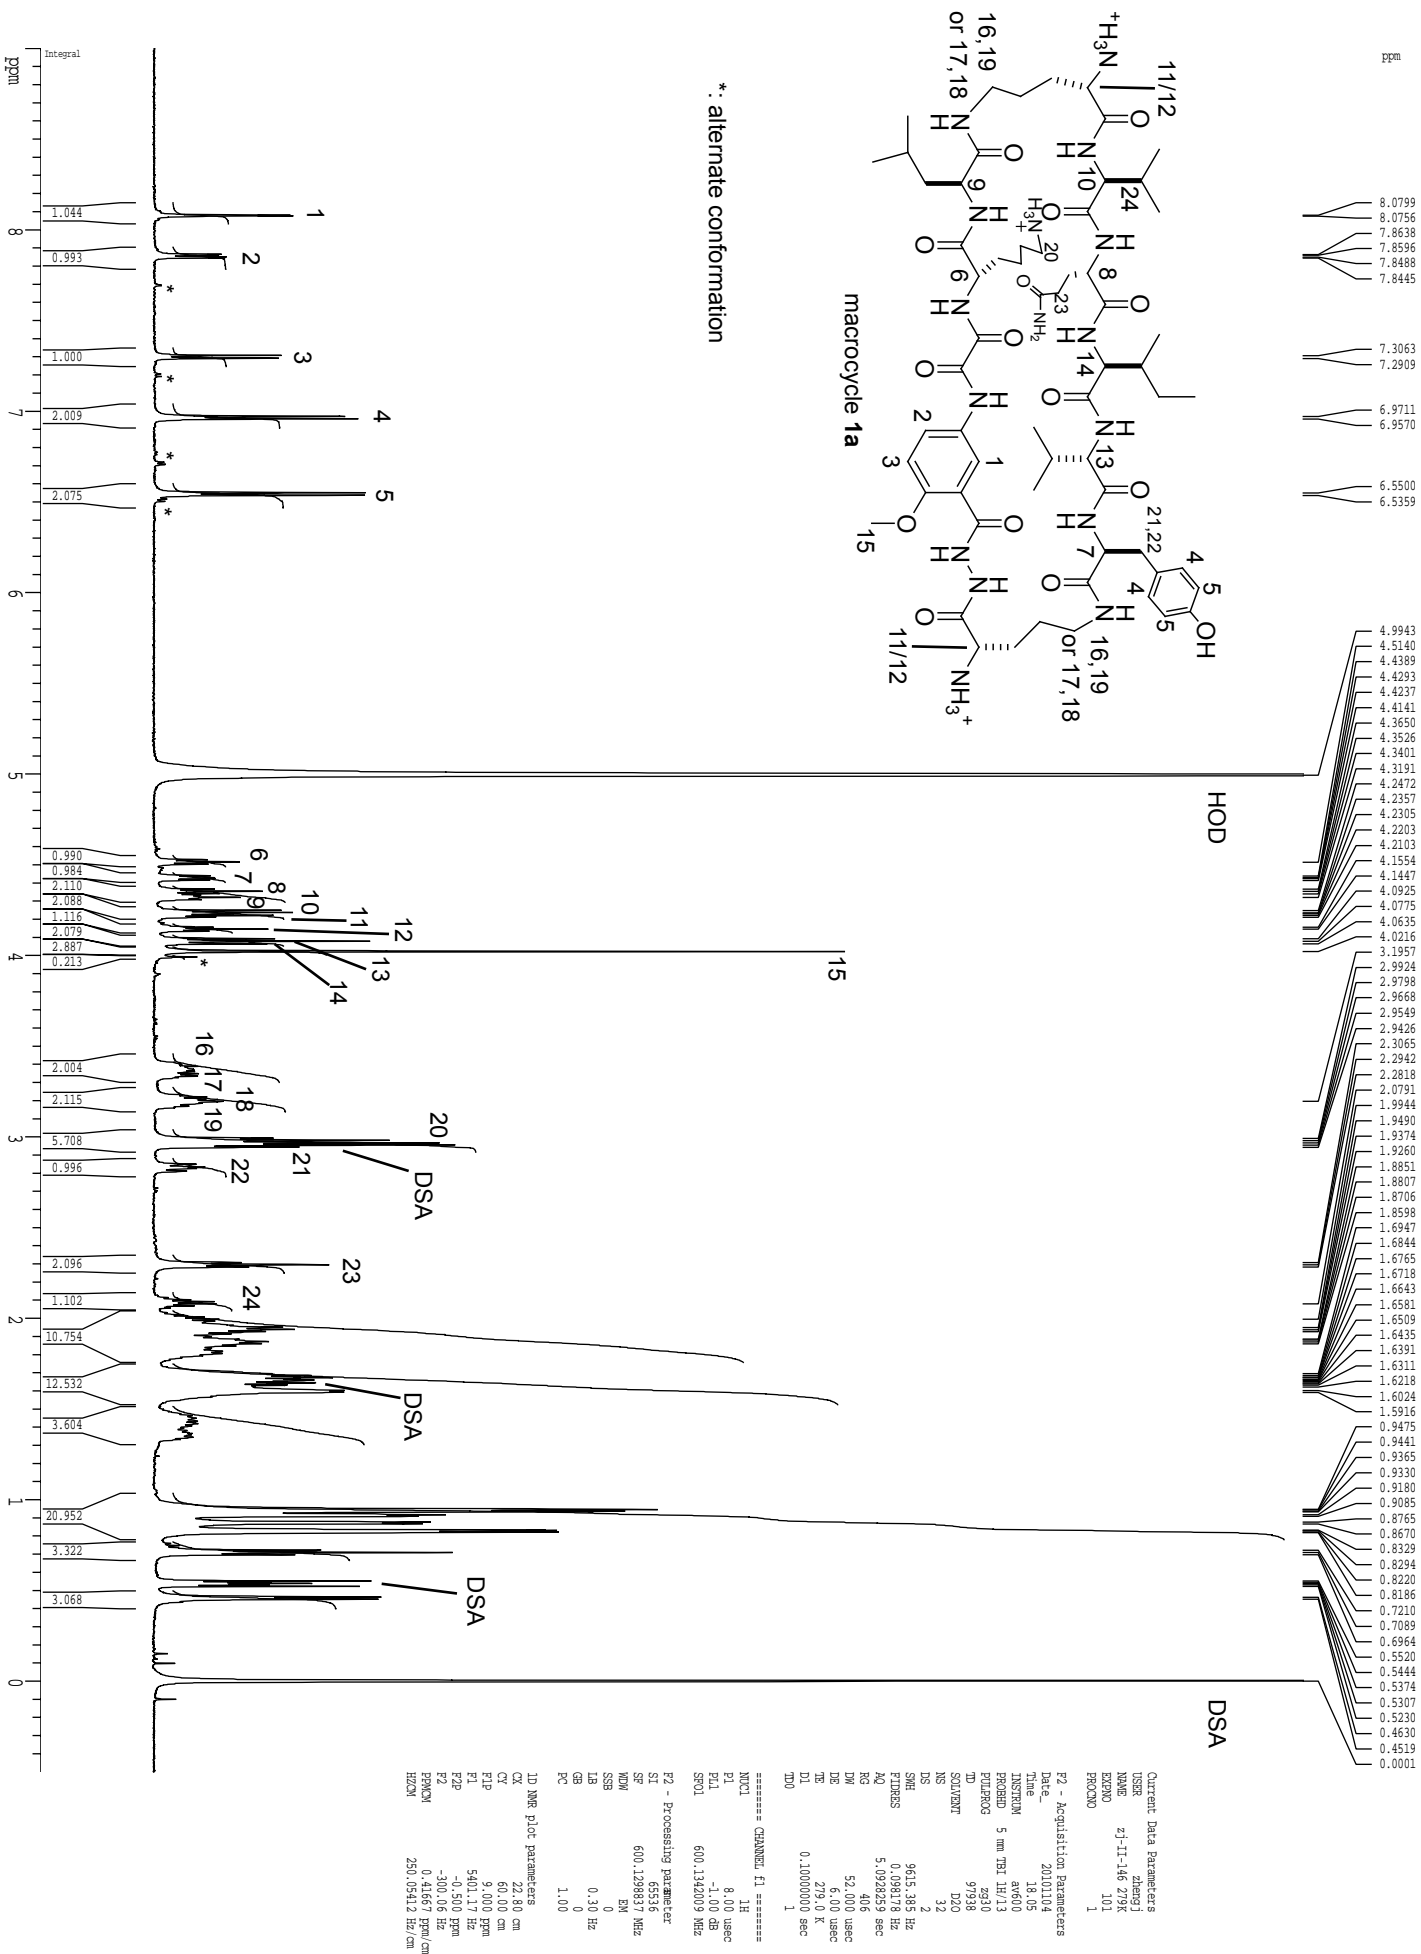

# Macrocycle 1a, 1H NMR spectrum, 2 mM in D<sub>2</sub>O with DSA, 6°C, 600 MHz

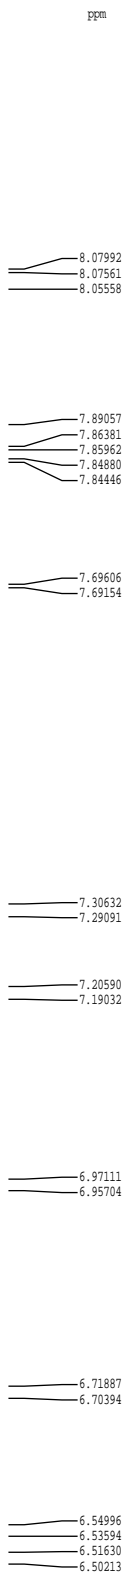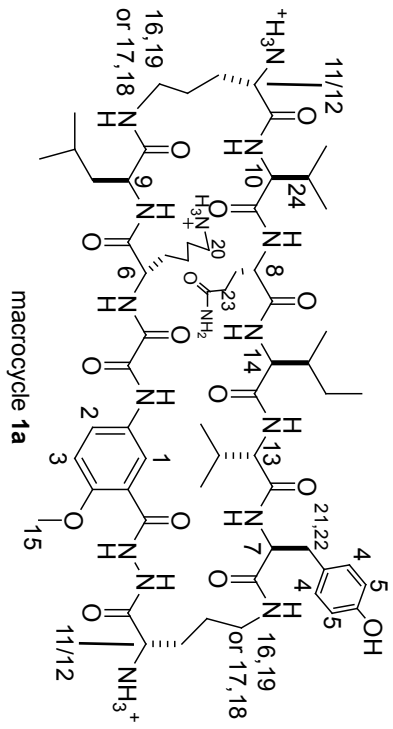

\*. alternate conformation

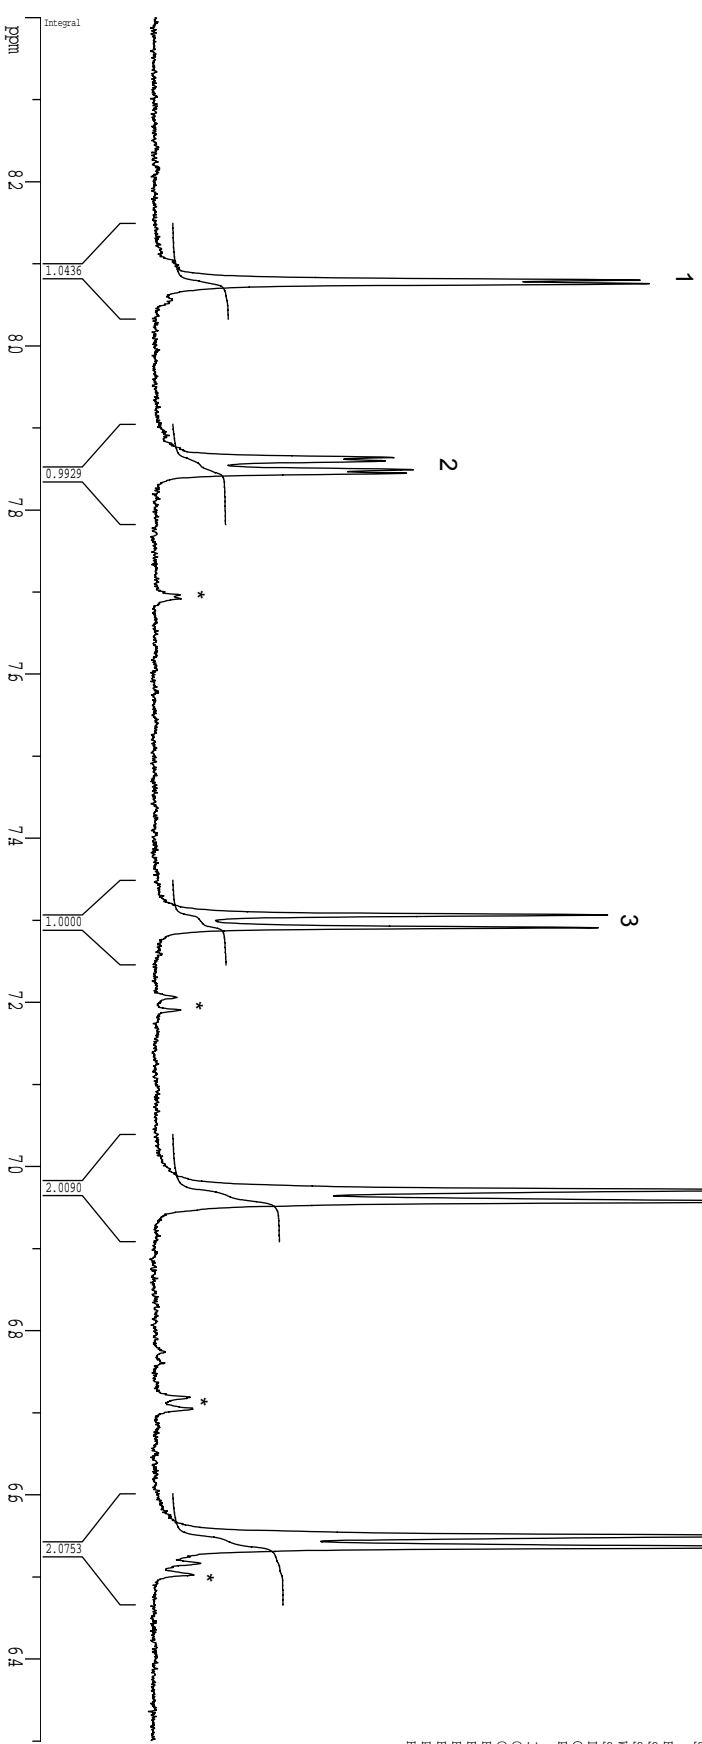

```

Current Data Parameters
USER          zhangj1
NAME         zj-11-146 279K
EXPNO        101
PROCNO       1
F2 - Acquisition Parameters
Date_        2010104
Time        18:05
INSTRUM      spect
PROBHD       5 mm TBI 1H/13
PULPROG      zgpg30
TD           65536
SOLVENT      D2O
NS           32
DS           2
SWH          9615.385 Hz
FIDRES       0.098178 Hz
AQ           5.0928259 sec
RG           406
DW           52.000 usec
DE           6.00 usec
TE           279.0 K
D1           0.10000000 sec
TD0          1
----- CHANNEL f1 -----
NUC1          1H
P1            8.00 usec
PC1           -1.00 dB
SFO1          600.1342009 MHz
F2 - Processing parameters
SI           65536
SF           600.1298837 MHz
WDW          EM
SSB          0
LB           0.30 Hz
GB           0
PC           1.00
JD NMR plot parameters
CX          22.80 cm
CY          20.00 cm
CZ          6.500 cm
ETP         50.000 Hz
E1P         6.300 Hz
E2P         3780.82 Hz
PROMCM      0.09211 ppm/cm
HZCM        55.27511 Hz/cm
  
```

# Macrocycle 1a, <sup>1</sup>H NMR spectrum, 2 mM in D<sub>2</sub>O with DSA, 6°C, 600 MHz

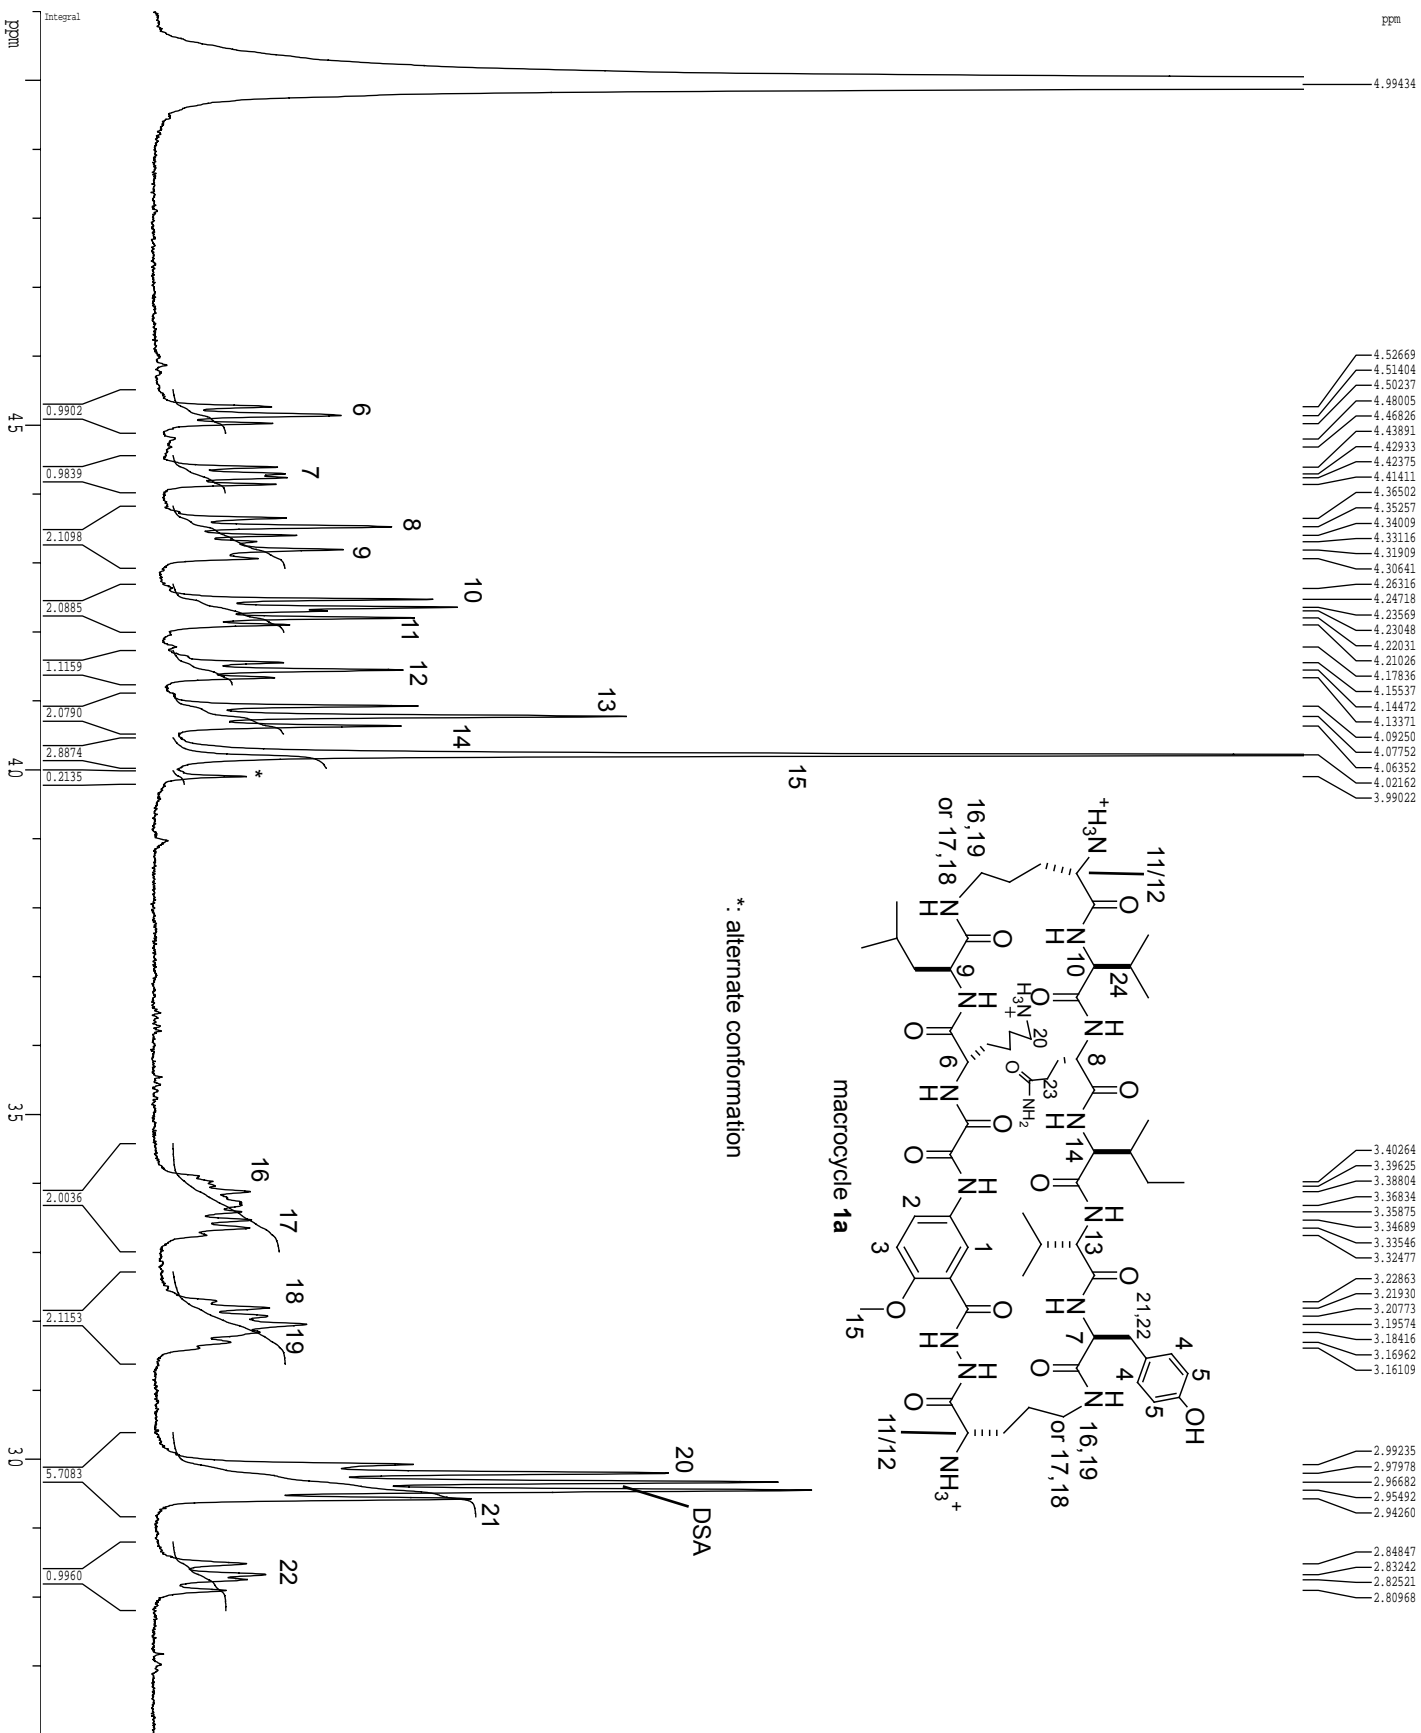

\*: alternate conformation

```

Current Data Parameters
USER          zhangyj
NAME          zj-11-146 279K
EXPNO        101
PROCNO       1
F2 - Acquisition Parameters
Date_         2010104
Time         23:00
INSTRUM      spect
PROBHD      5 mm TBI HX13
PULPROG     zgpg30
TD           65536
SOLVENT     D2O
NS           32
DS           2
SHF          961.5385 Hz
FIDRES      0.098178 Hz
AQ           5.0928259 sec
RG           406
DW           52.000 usec
DE           6.00 usec
TE           279.0 K
D1           0.10000000 sec
D10          1

===== CHANNEL f1 =====
NUC1          1H
P1            8.00 usec
PL1          -1.00 dB
SFO1         600.1342009 MHz

F2 - Processing parameters
SI           65536
SF           600.1298837 MHz
WDW          EM
SSB          0
LB           0.30 Hz
GB           0
PC           1.00

JD NMR plot parameters
CX           22.80 cm
CY           20.00 cm
CZ           11.00 cm
CTP         3060.66 Hz
E1          2.600 Hz
E2          1560.34 Hz
PROMCM      0.10965 ppm/cm
HZCM        65.80372 Hz/cm
    
```



# Macrocycle 1a, <sup>1</sup>H NMR spectrum, 2 mM in D<sub>2</sub>O with DSA, 6°C, 600 MHz

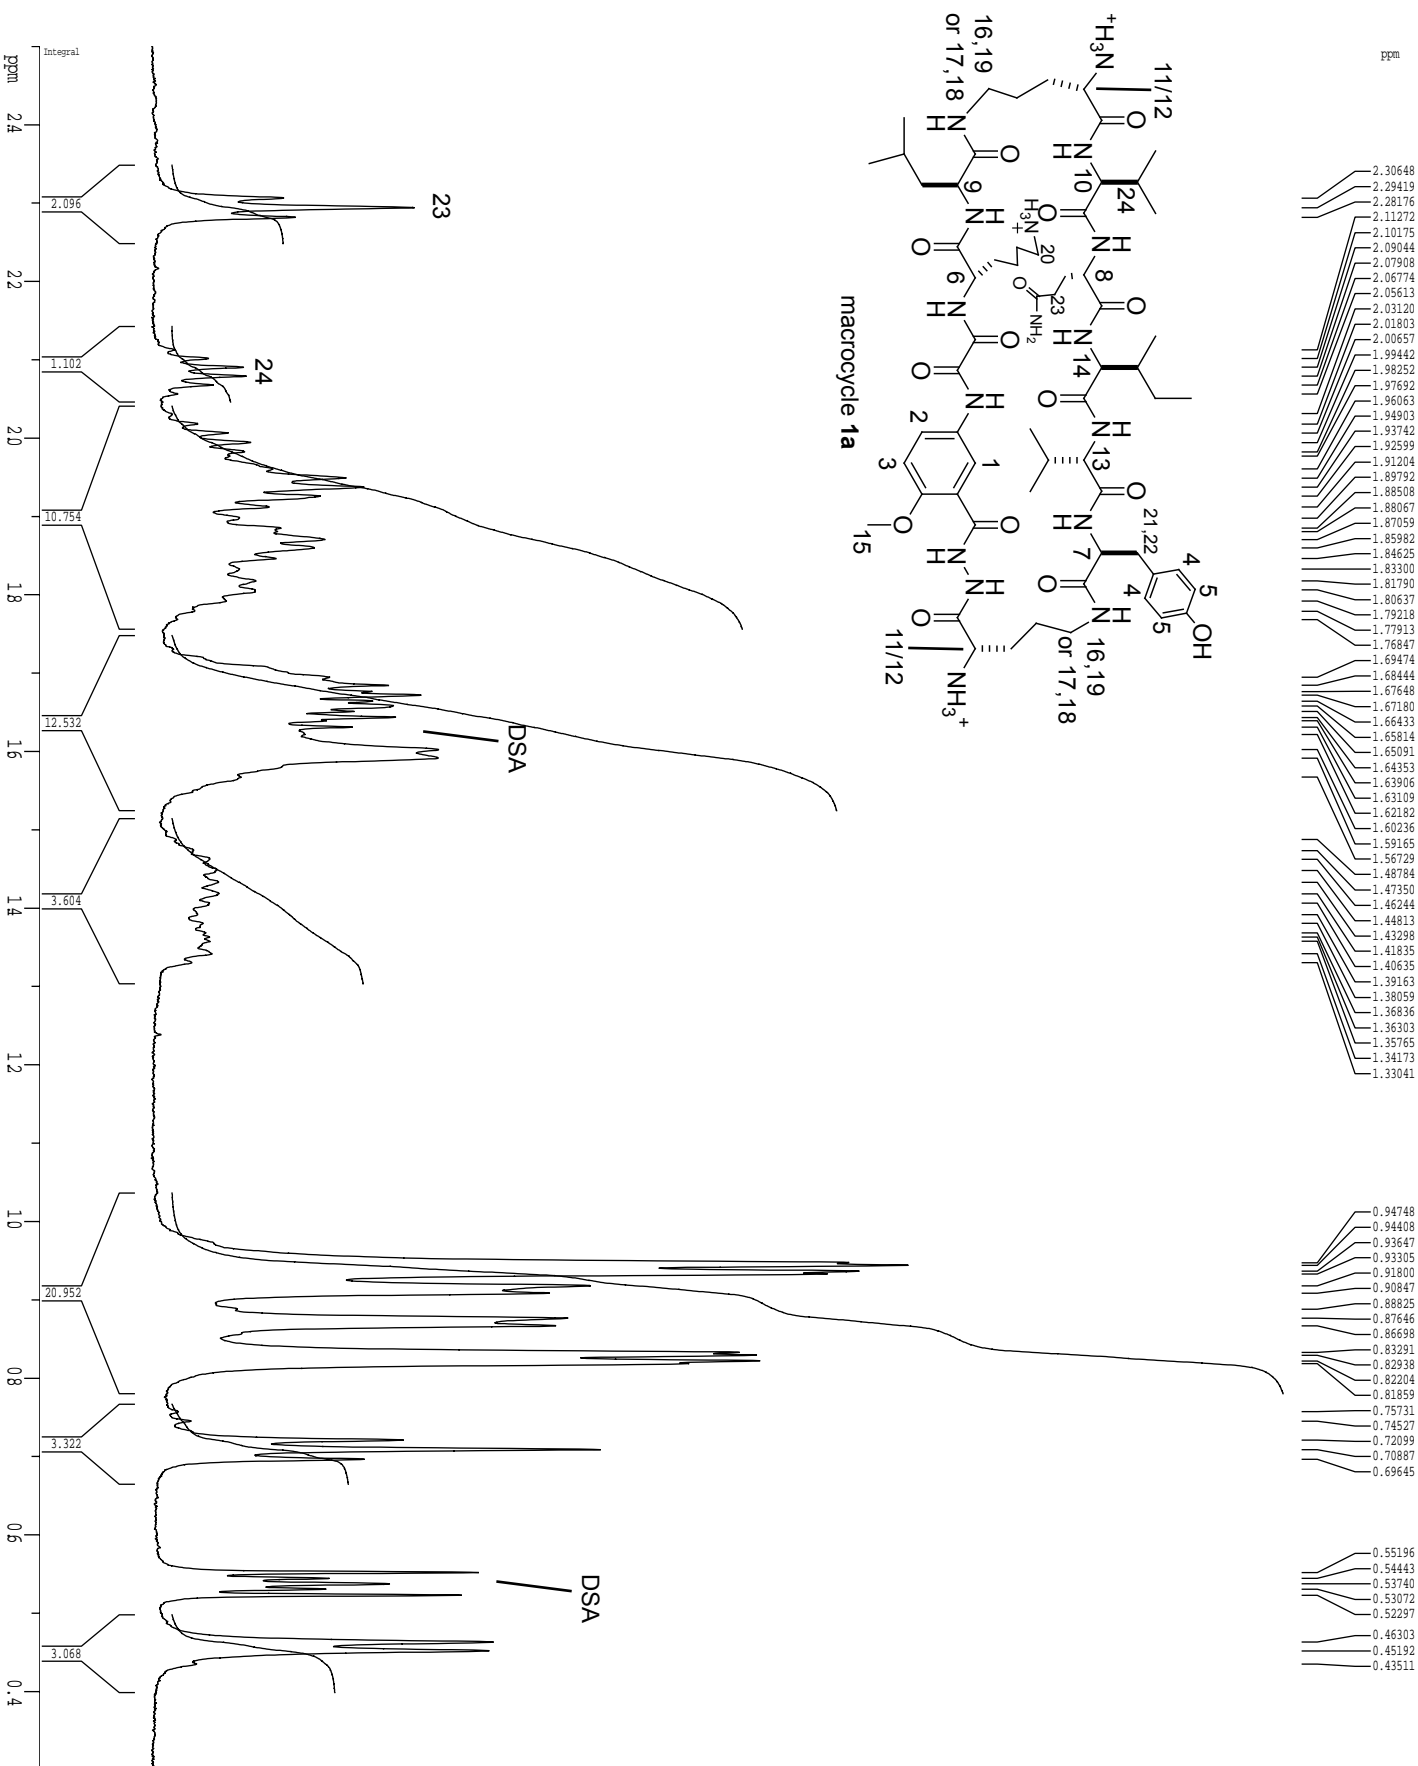

Current Data Parameters  
 USER zhangj  
 NAME zj-11-146 279K  
 EXPNO 101  
 PROCNO 1

F2 - Acquisition Parameters  
 Date\_ 2010104  
 Time 10:05  
 INSTRUM spect  
 PROBRD 5 mm TBI HX/13  
 PULPROG zgpg30  
 TD 97338  
 SOLVENT D2O  
 NS 32  
 DS 2  
 SWH 9615.385 Hz  
 FIDRES 0.098178 Hz  
 AQ 5.0928259 sec  
 RG 406  
 DW 52.000 usec  
 DE 6.00 usec  
 TE 279.0 K  
 D1 0.10000000 sec  
 D10 1

\*\*\*\*\* CHANNEL f1 \*\*\*\*\*  
 NUC1 <sup>1</sup>H  
 P1 8.00 usec  
 PL1 -1.00 dB  
 SFO1 600.1362009 MHz

F2 - Processing parameter  
 SI 65536  
 SF 600.1298837 MHz  
 WDW EM  
 SSB 0  
 LB 0.30 Hz  
 GB 0  
 PC 1.00

ID NMR plot parameters  
 CX 22.80 cm  
 CY 20.00 cm  
 CTP 2.00 Hz  
 F1 150.23 Hz  
 F2 0.306 Hz  
 F3 180.04 Hz  
 PPMCM 0.09649 ppm/cm  
 HZCM 57.90727 Hz/cm

Macrocycle **1a**, TOCSY spectrum, 2 mM in D<sub>2</sub>O with DSA, 6°C, 600 MHz, 150 ms mixing time

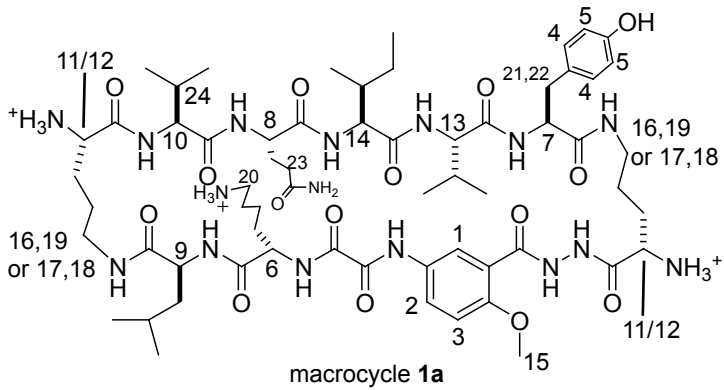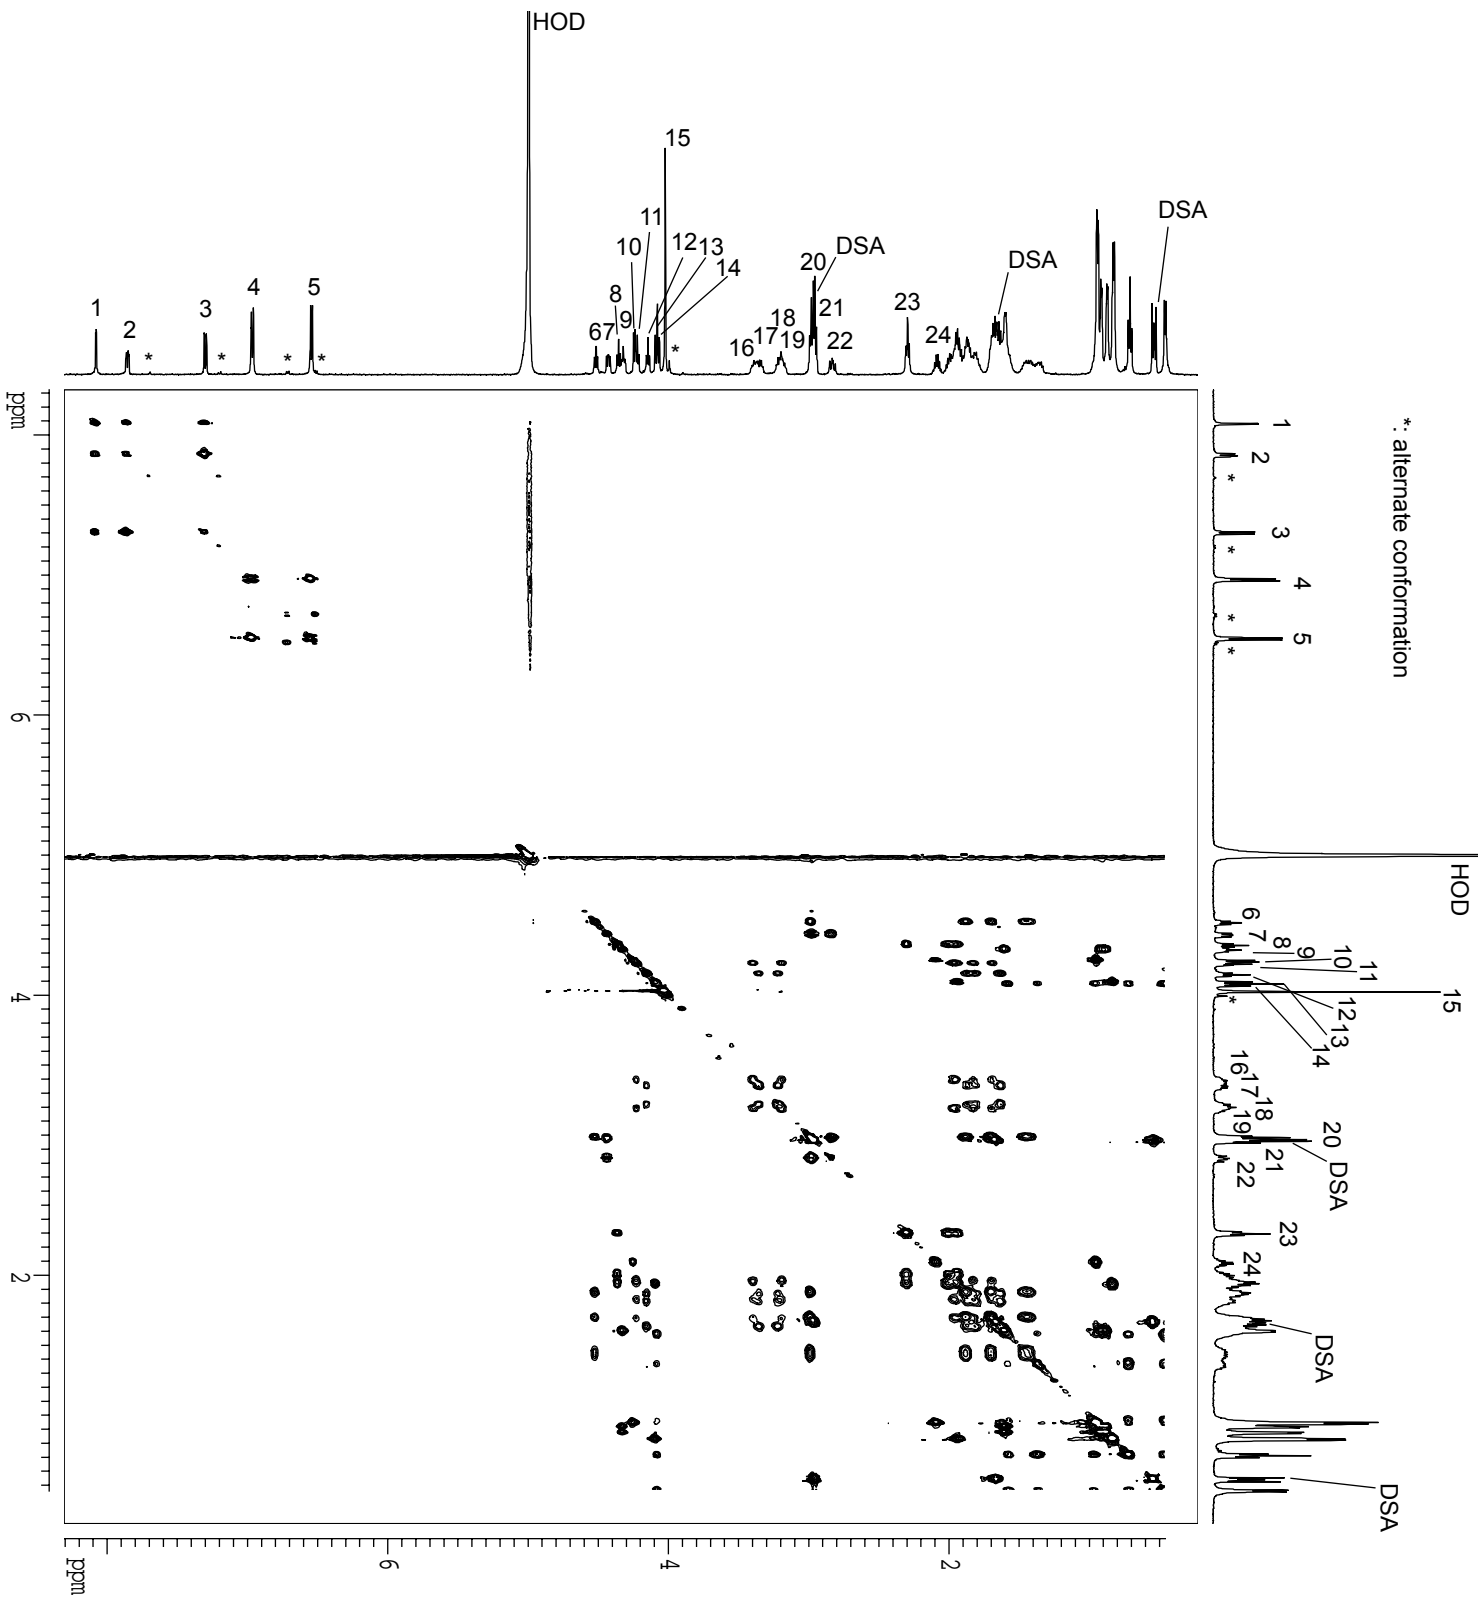

Macrocycle **1a**, TOCSY spectrum, 2 mM in D<sub>2</sub>O with DSA, 6°C, 600 MHz, 150 ms mixing time

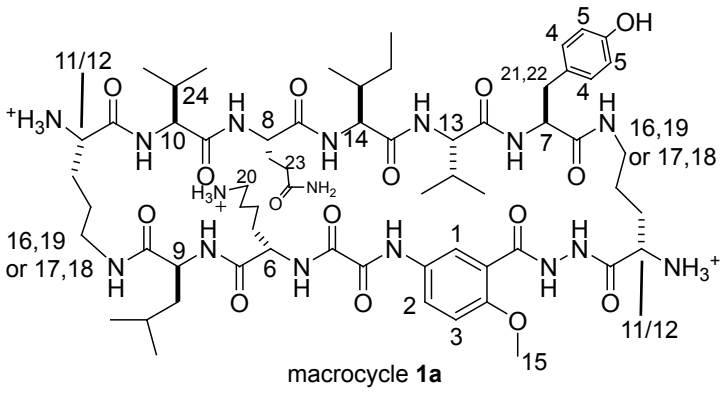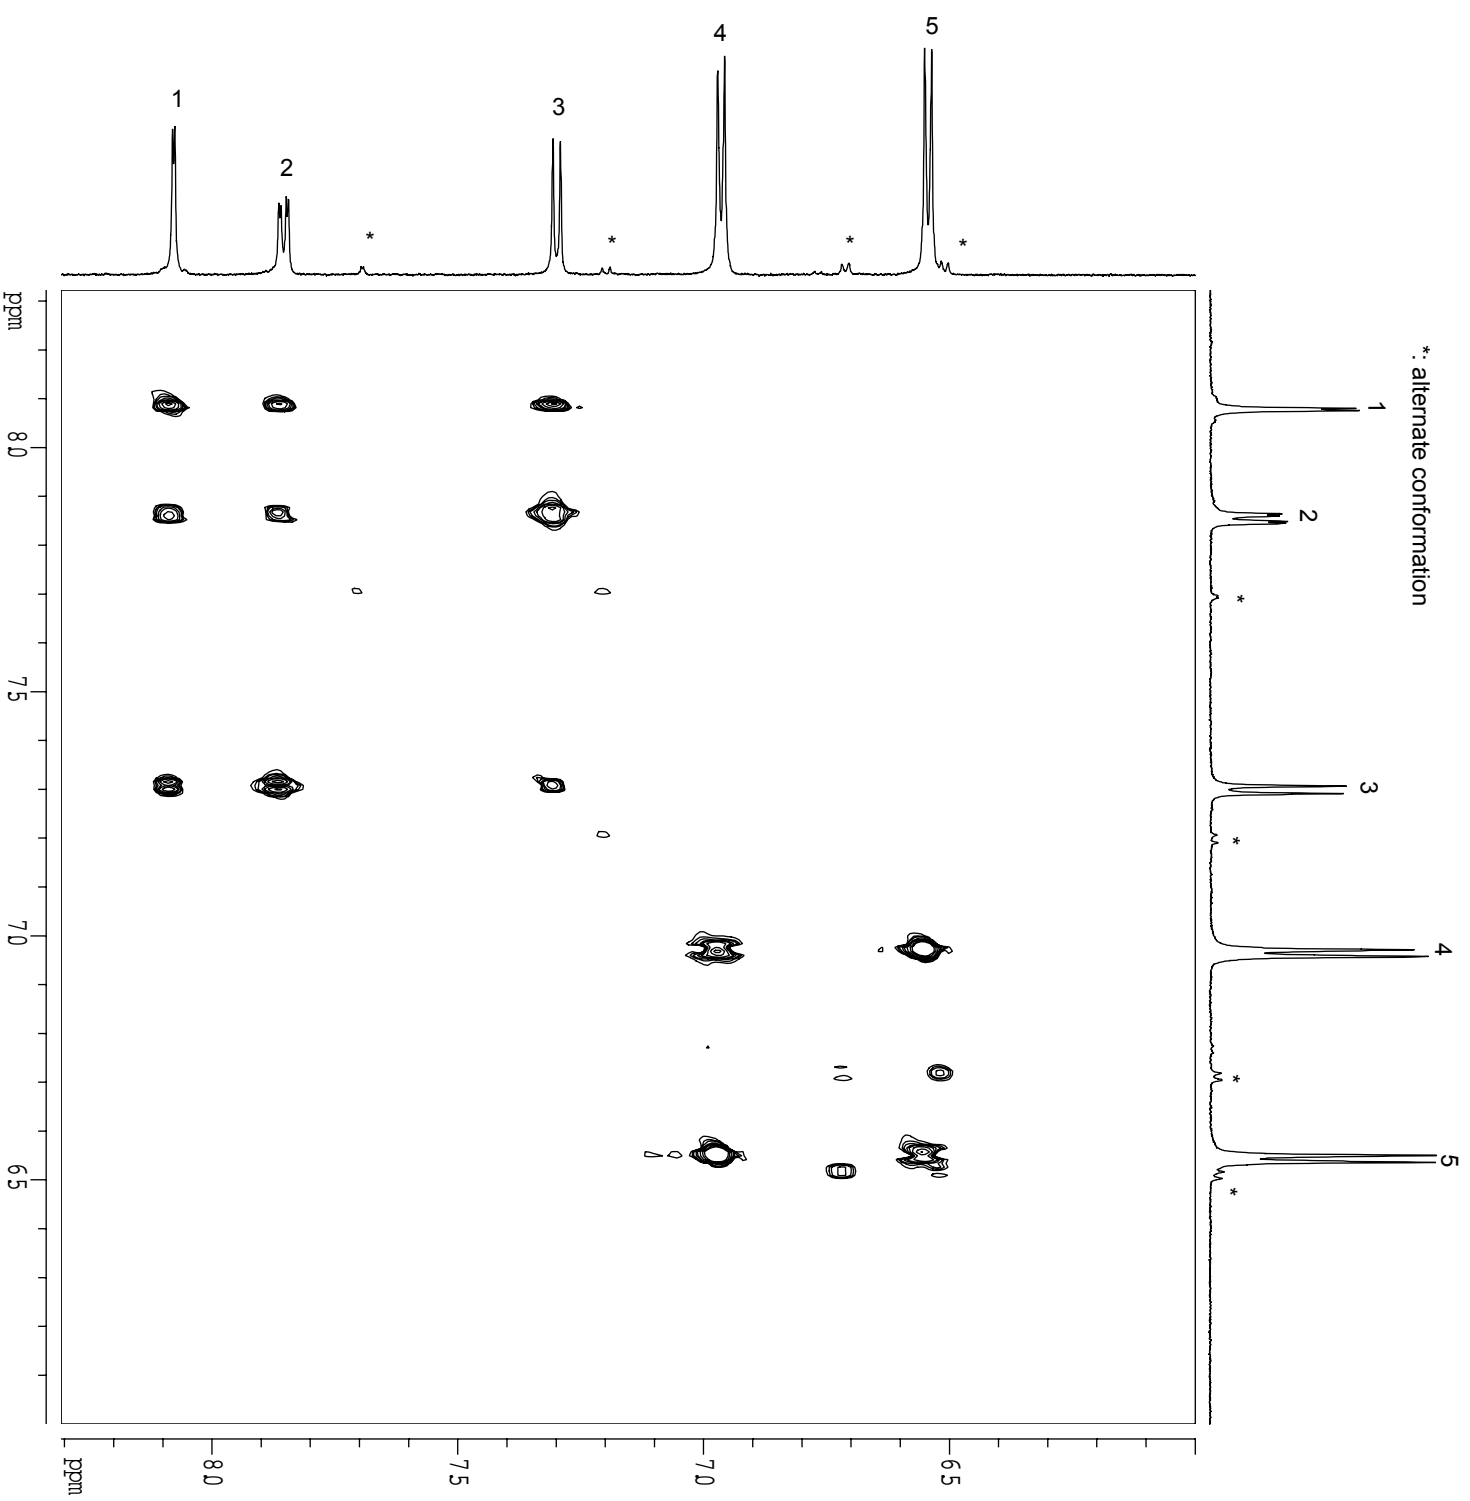

Macrocycle **1a**, TOCSY spectrum, 2 mM in D<sub>2</sub>O with DSA, 6°C, 600 MHz, 150 ms mixing time

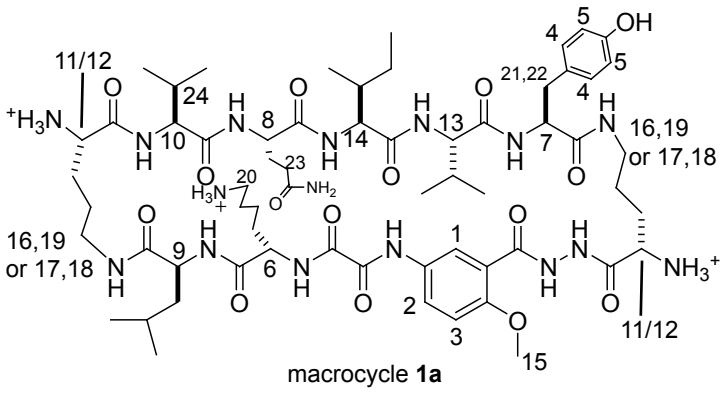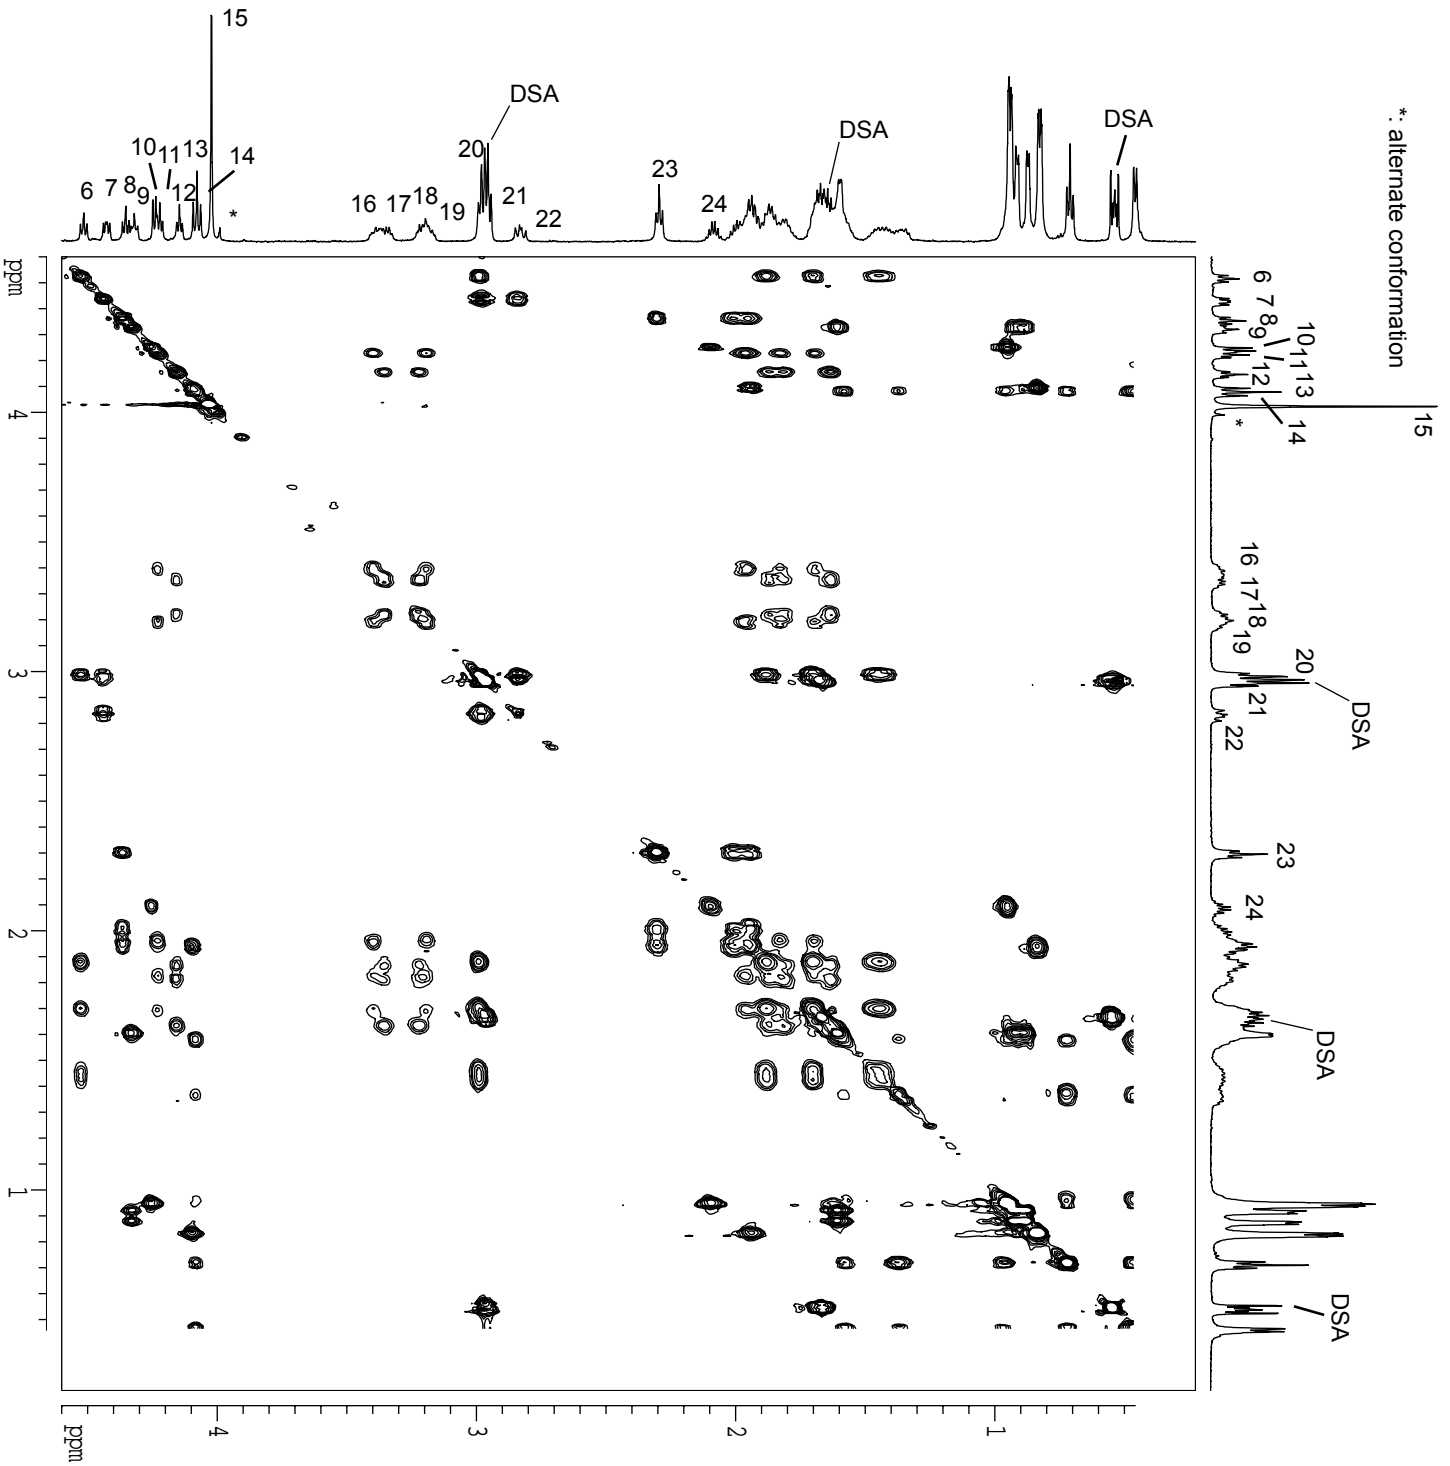

Macrocycle **1a**, ROESY spectrum, 2 mM in D<sub>2</sub>O with DSA, 6°C, 600 MHz, 250 ms mixing time

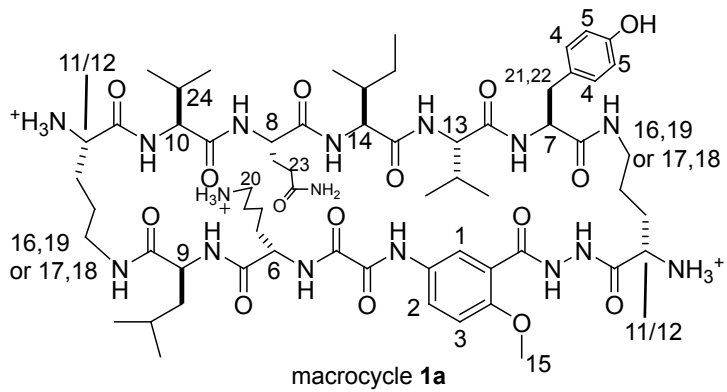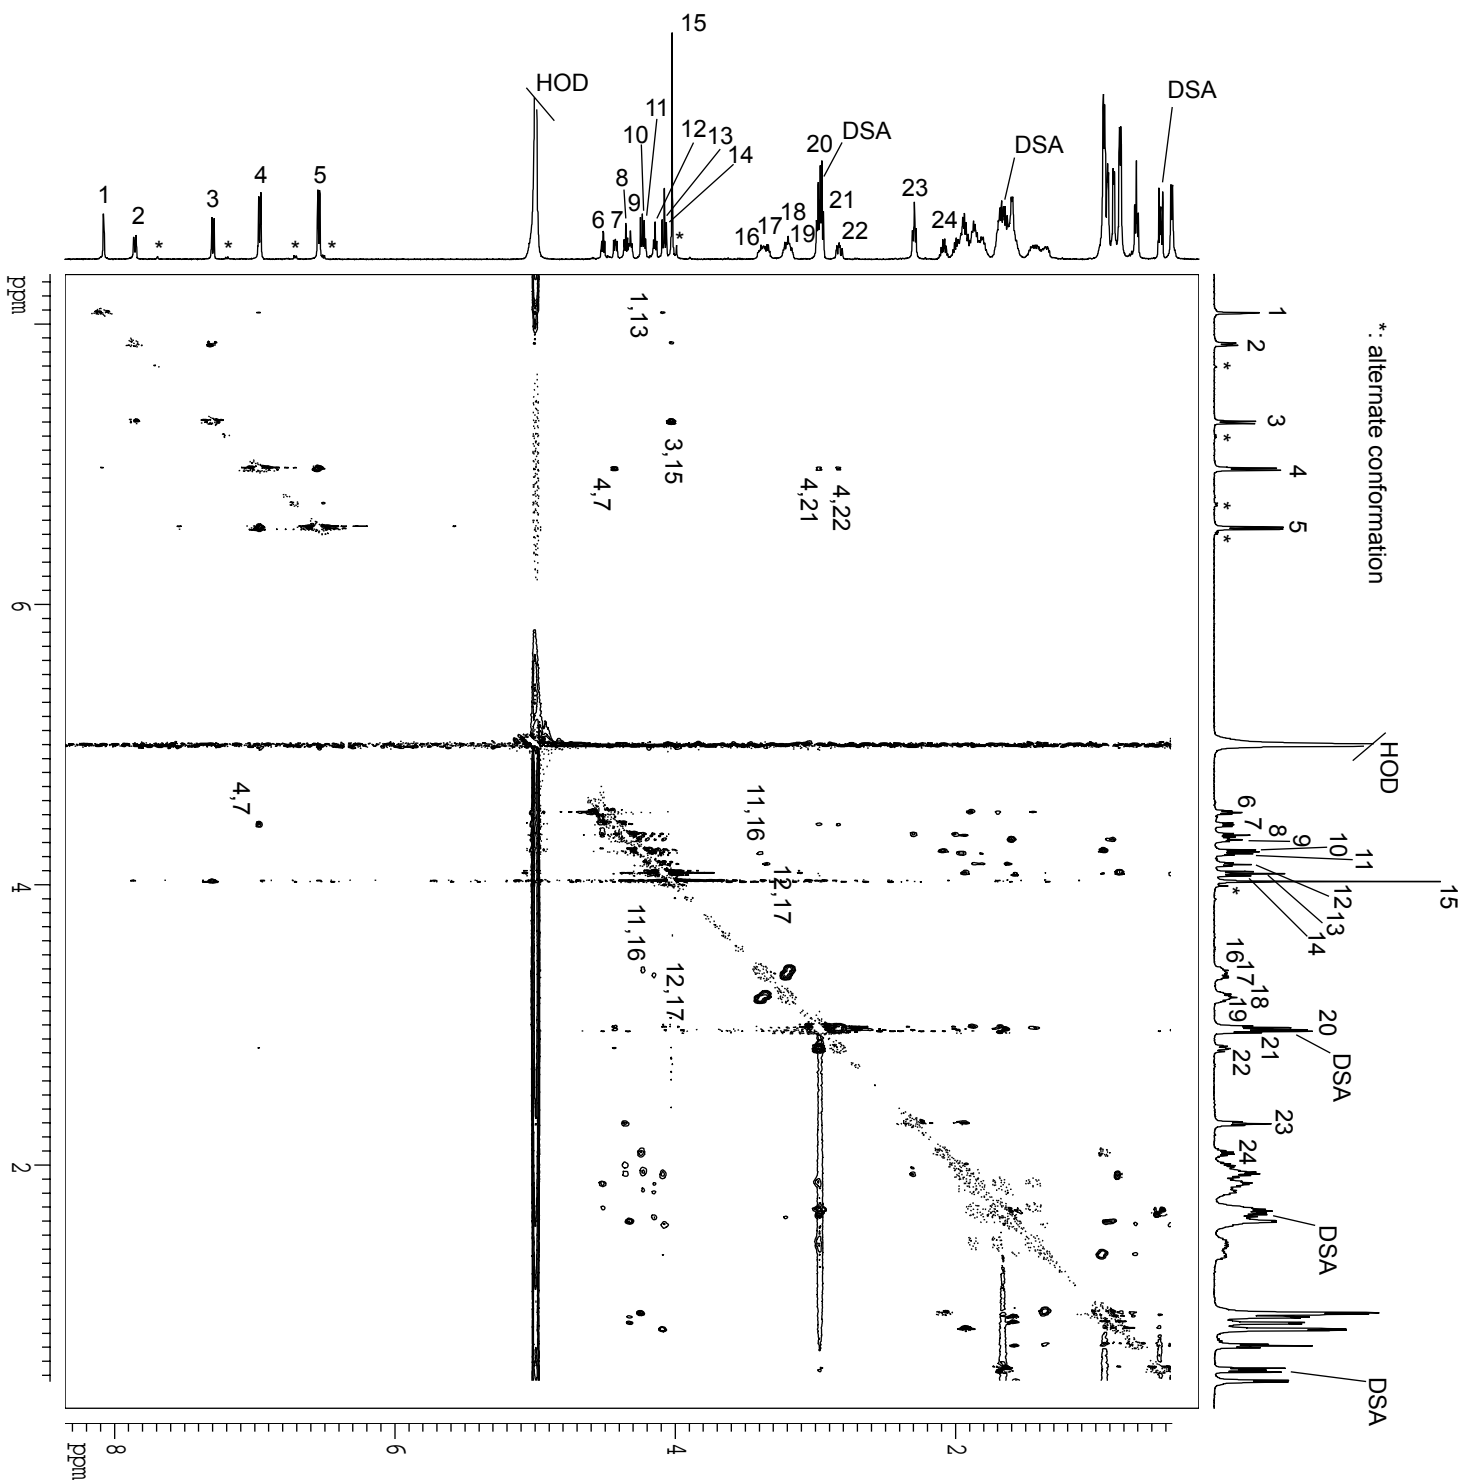

# Macrocycle **1a**, ROESY spectrum, 2 mM in D<sub>2</sub>O with DSA, 6°C, 600 MHz, 250 ms mixing time

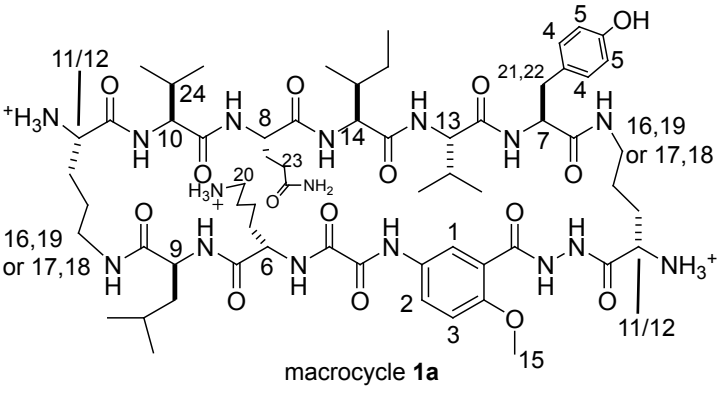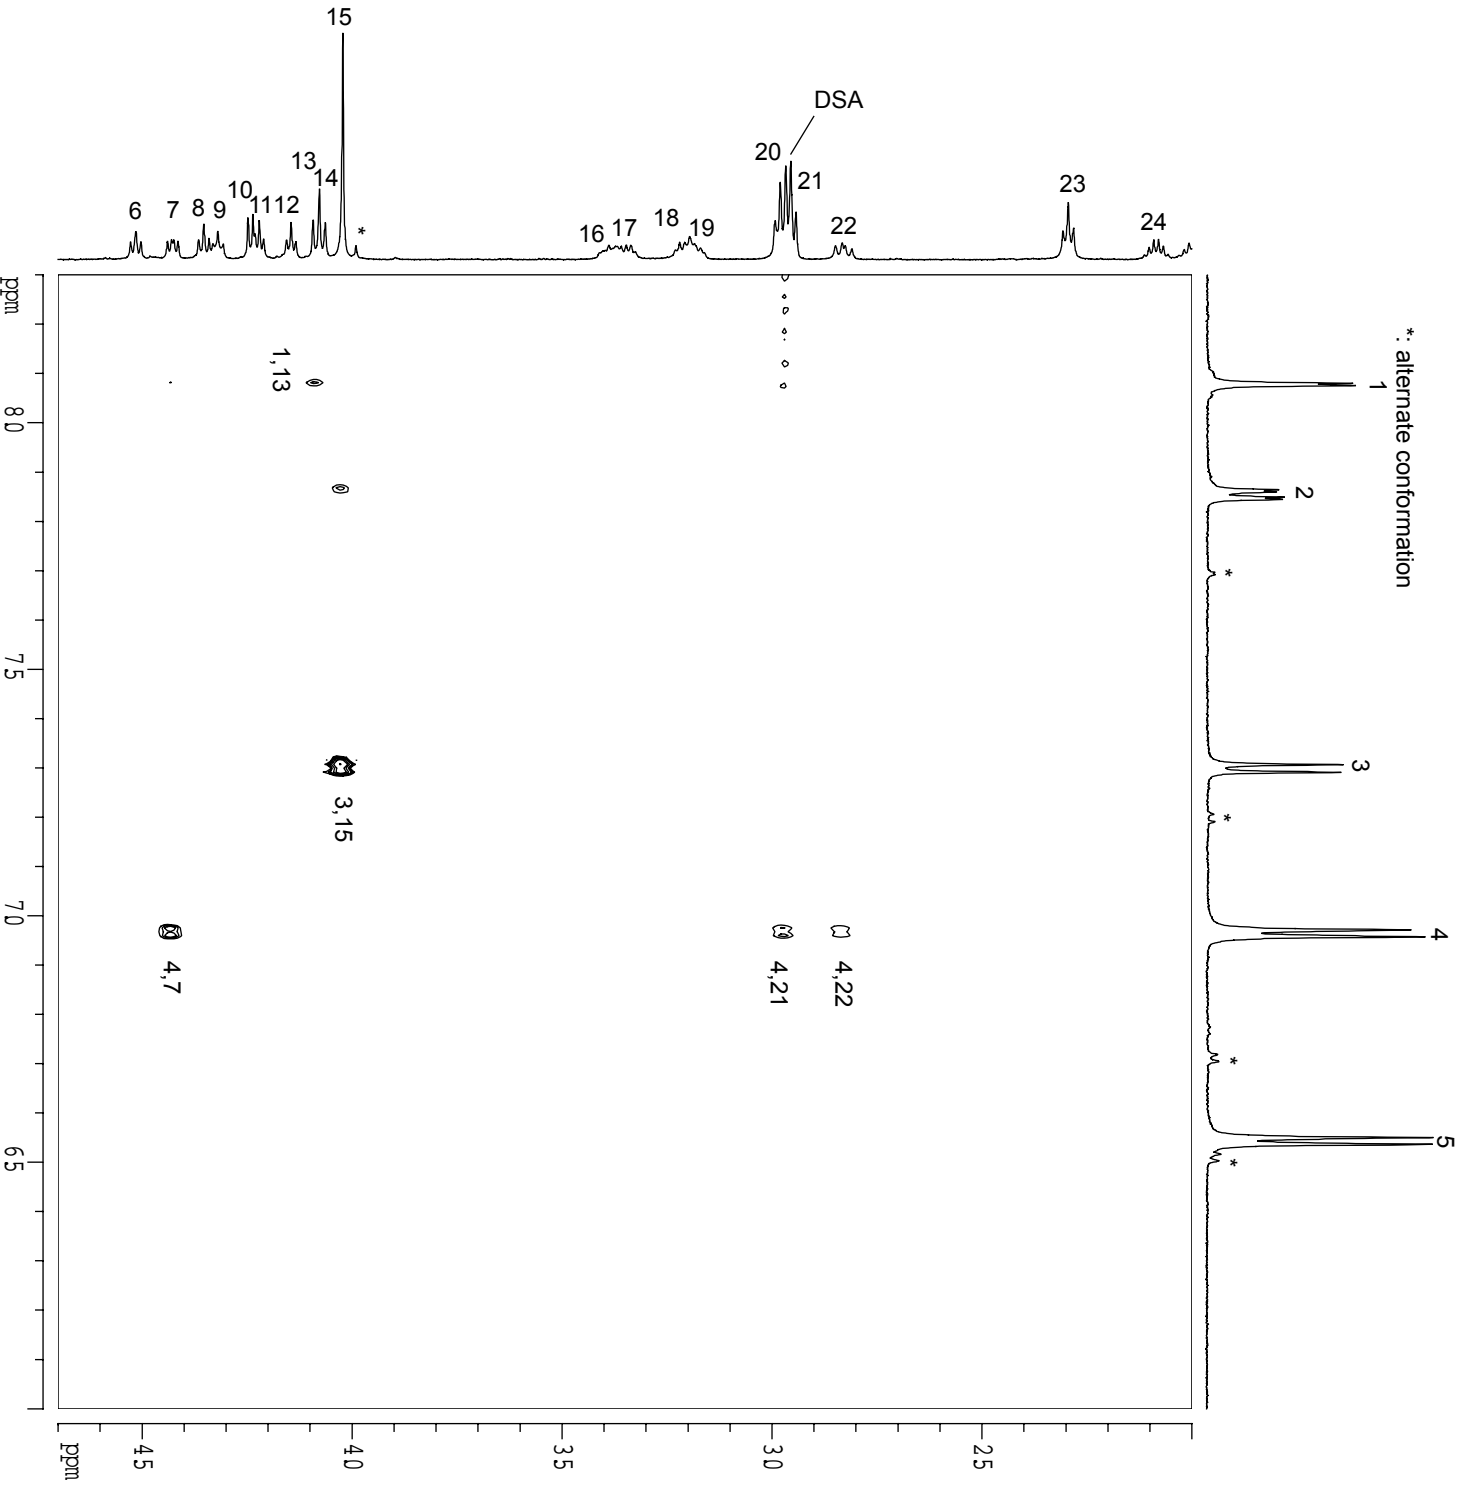

Macrocycle **1a**, ROESY spectrum, 2 mM in D<sub>2</sub>O with DSA, 6°C, 600 MHz, 250 ms mixing time

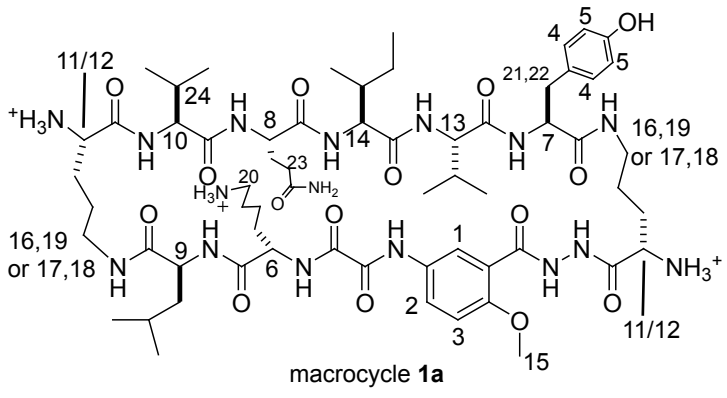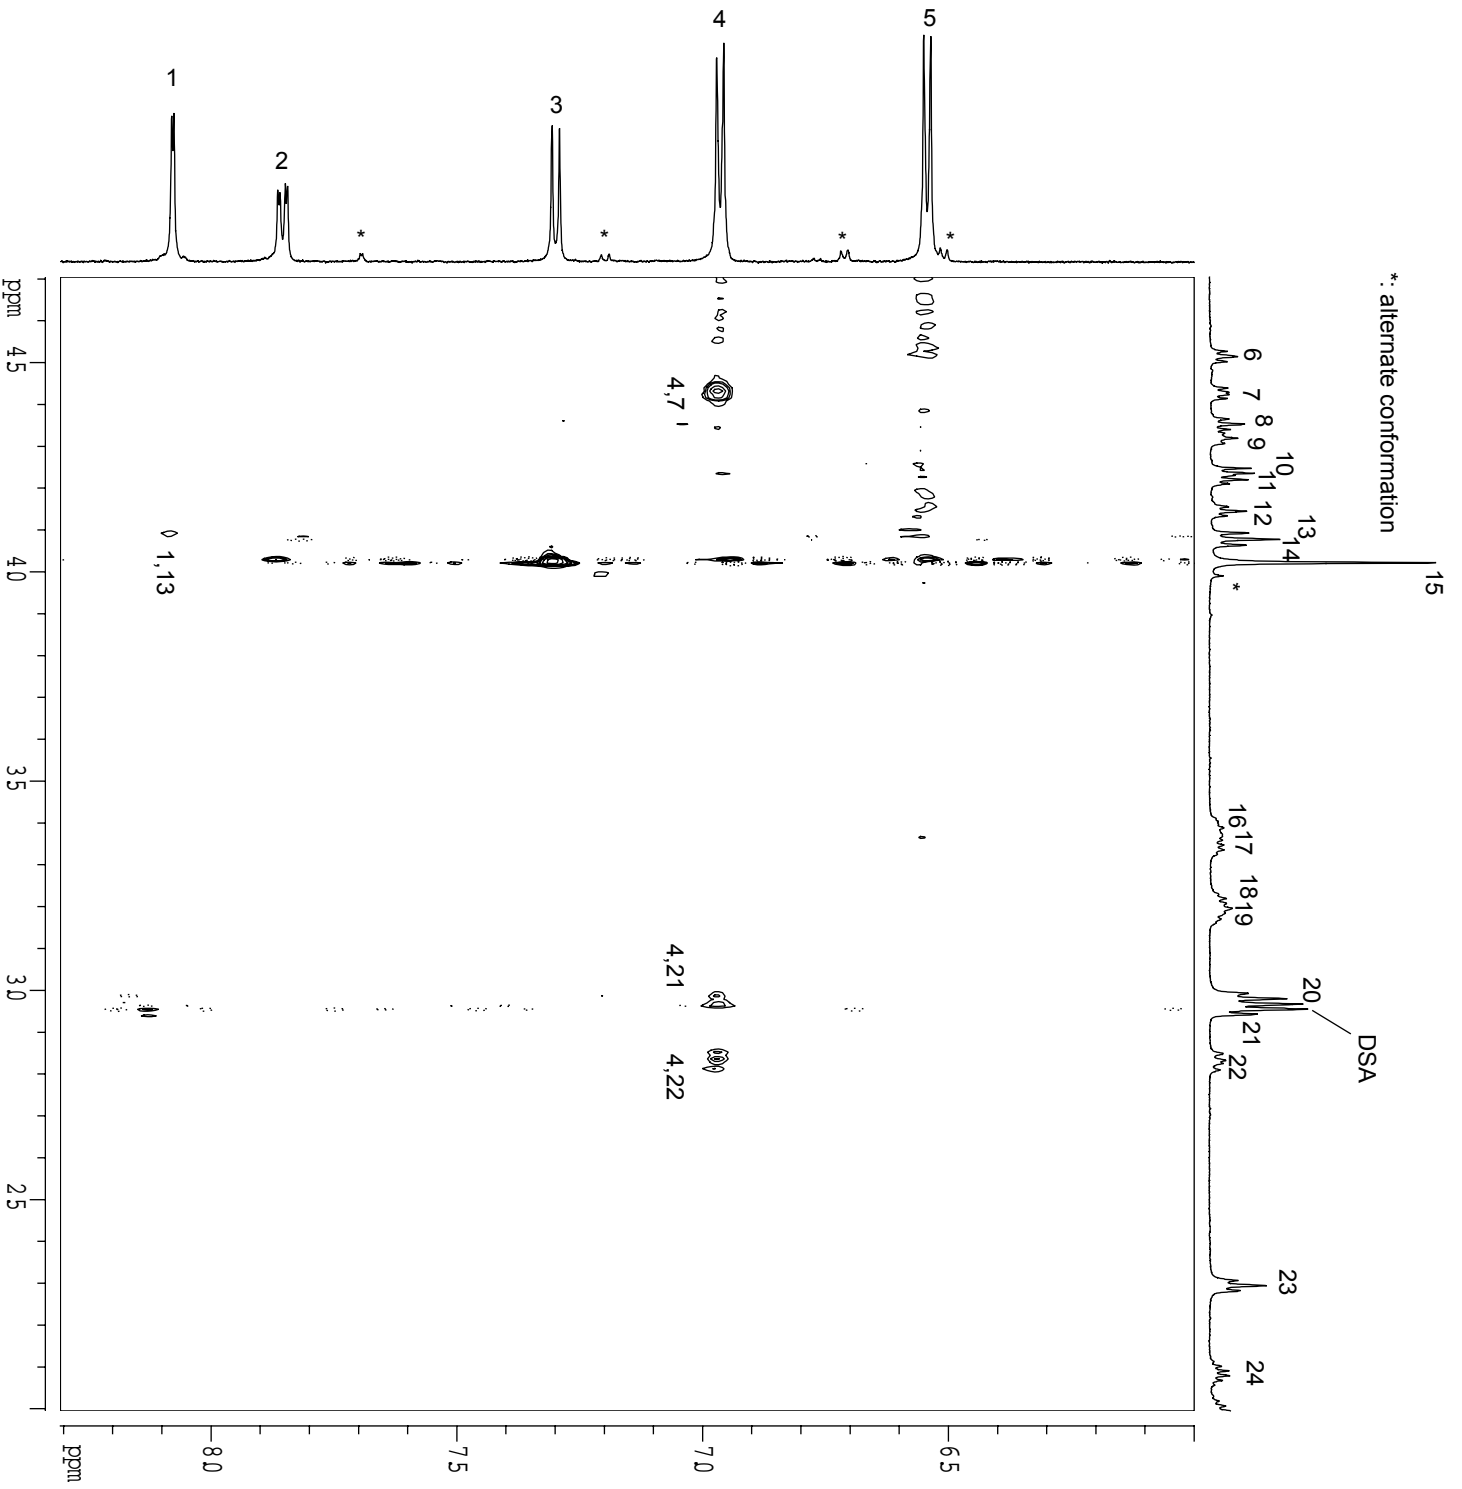

Macrocycle **1a**, ROESY spectrum, 2 mM in D<sub>2</sub>O with DSA, 6°C, 600 MHz, 250 ms mixing time

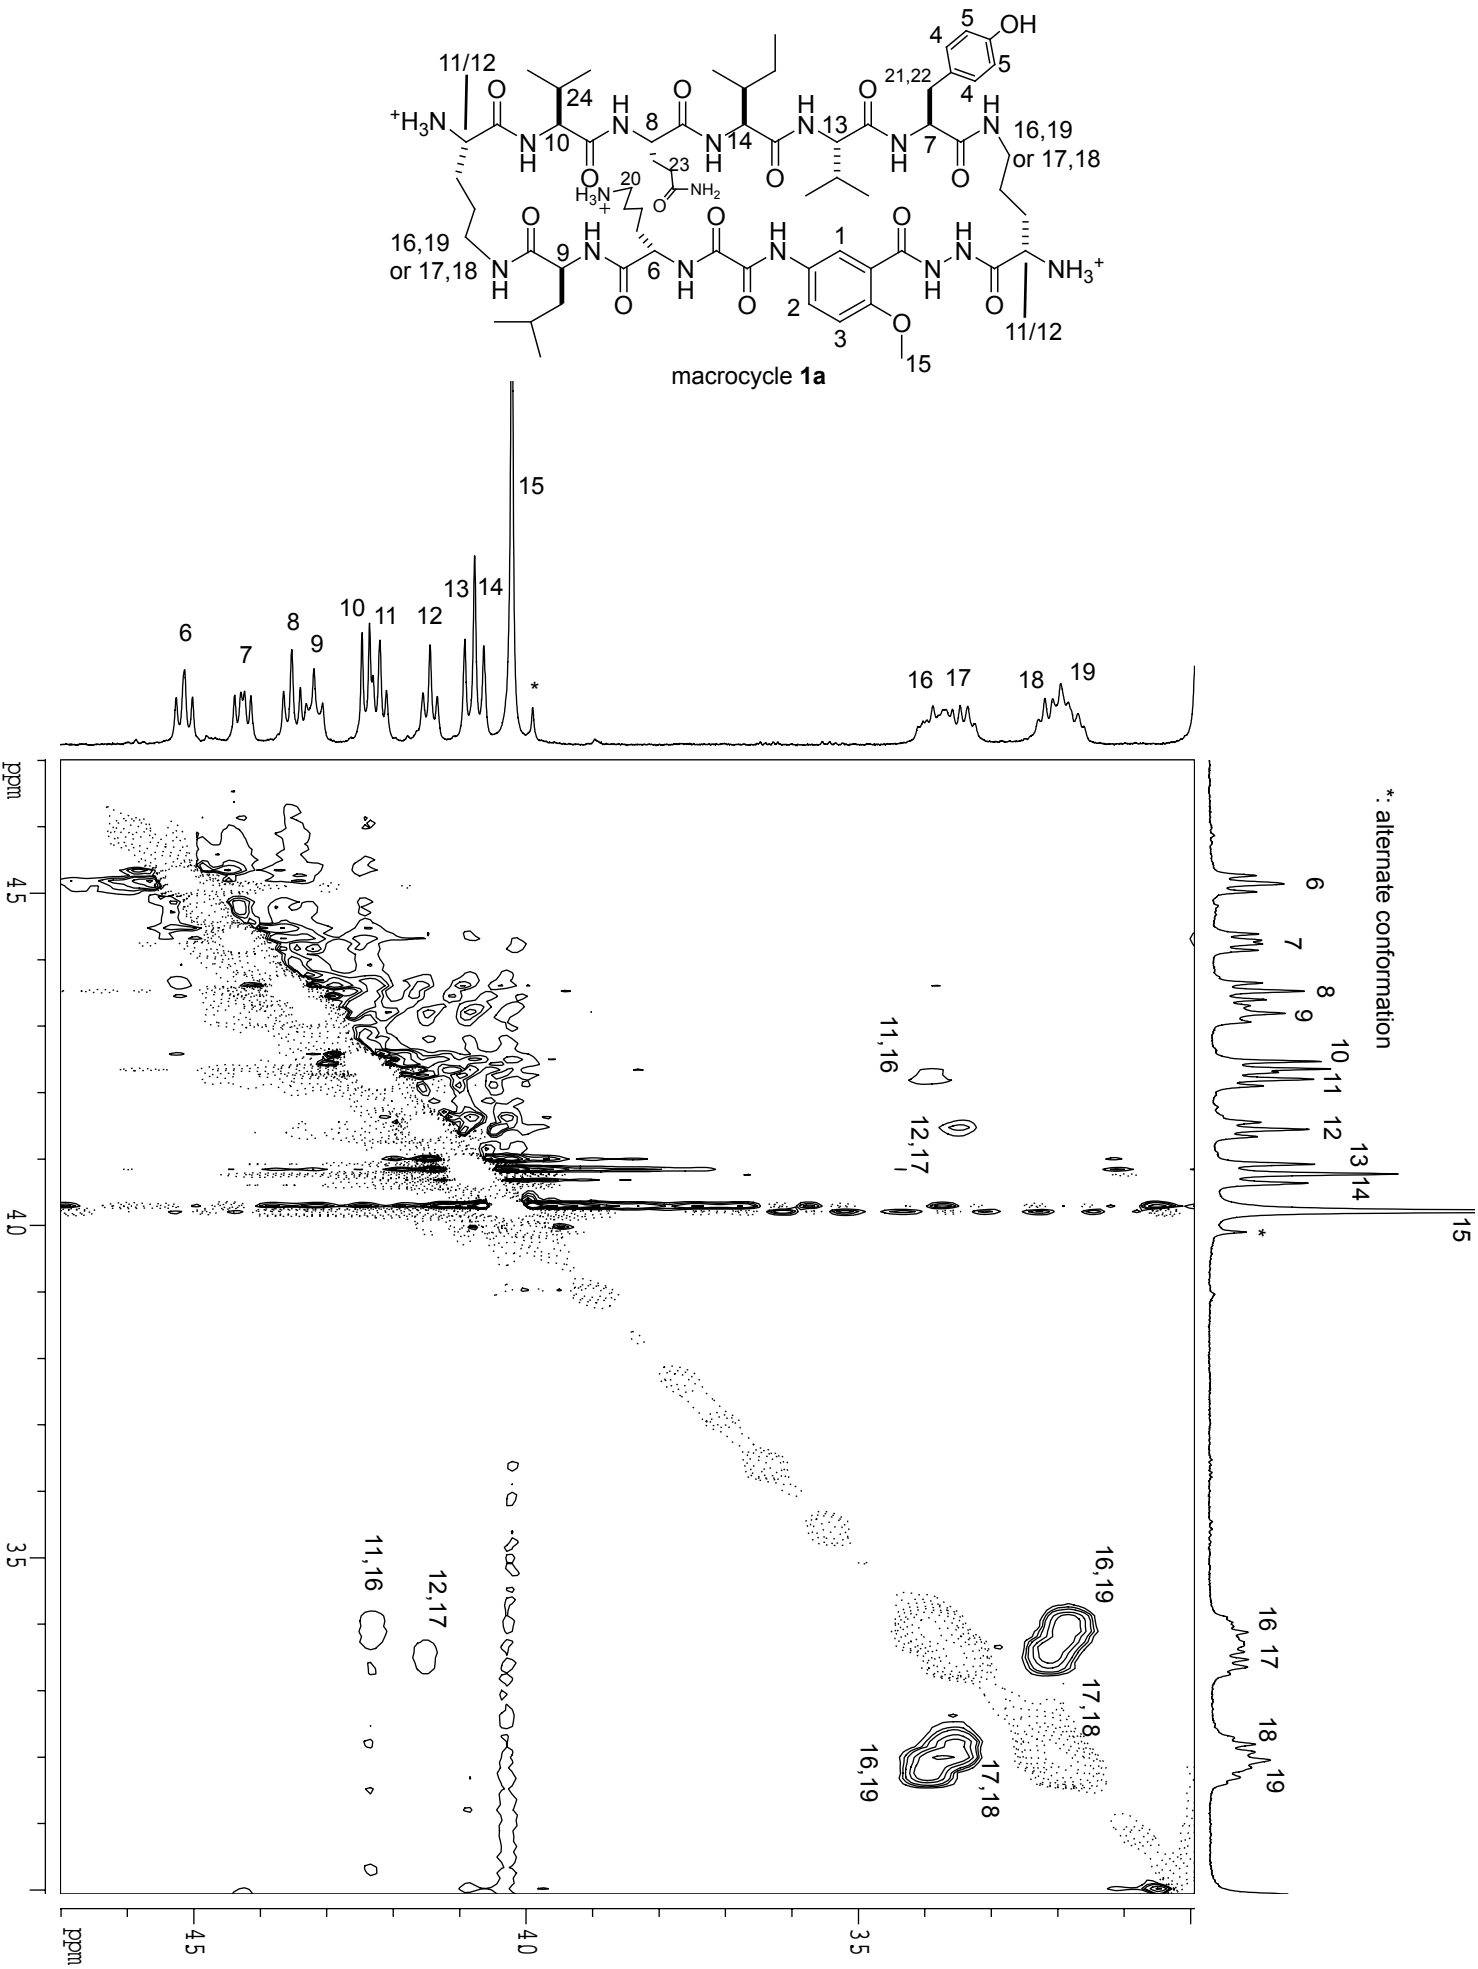



# Macrocycle 1c, <sup>1</sup>H NMR spectrum, 2 mM in D<sub>2</sub>O with DSA, 6°C, 600 MHz

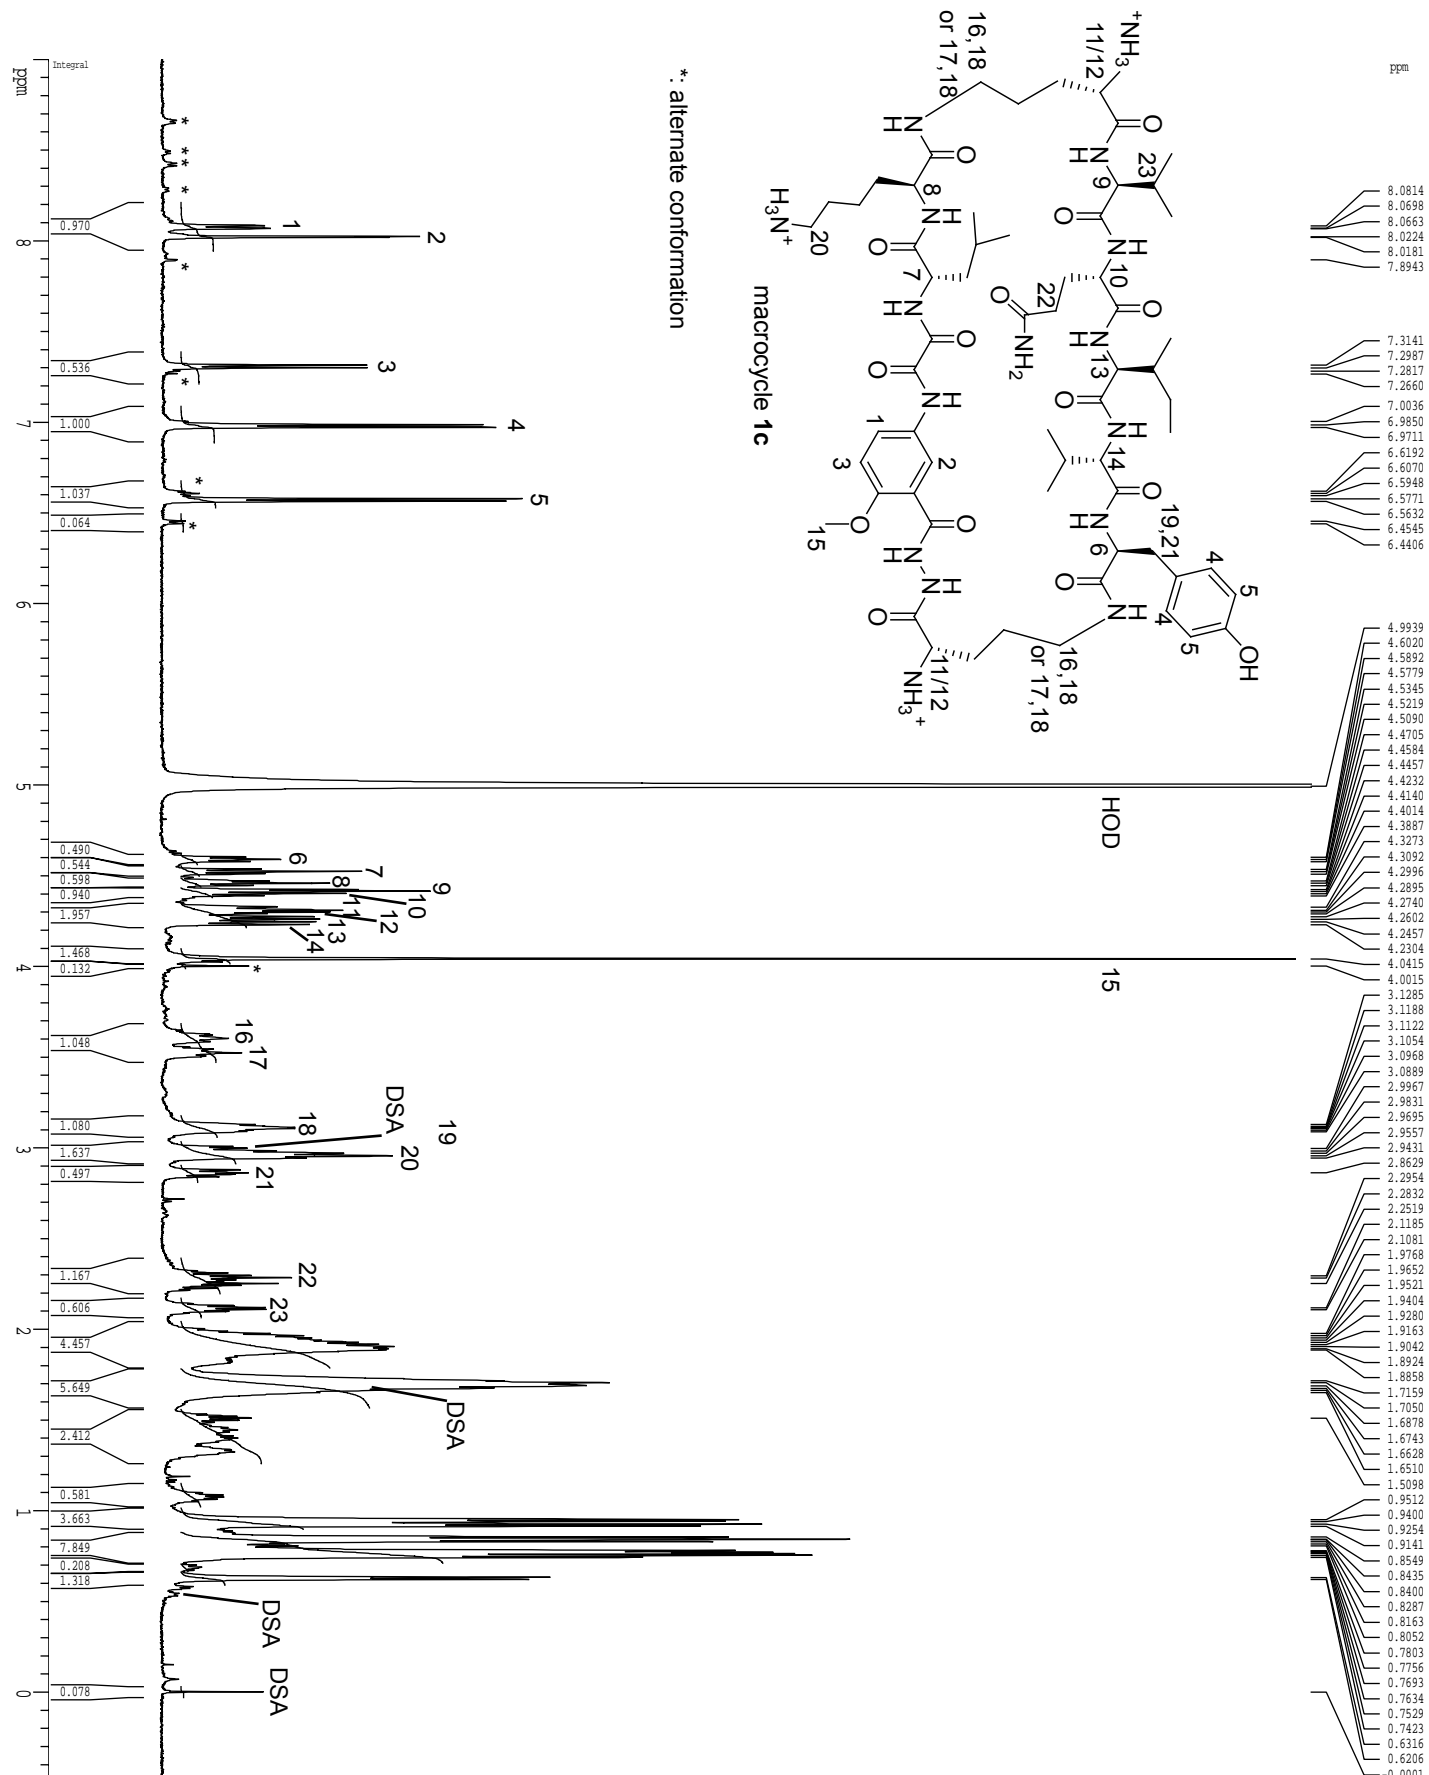

\*\*: alternate conformation

HOD

15

```

Current Data Parameters
USER          zhengj1
NAME         zj-11-14 60c
EXPNO        101
PROCNO       1
----- CHANNEL f1 -----
NUC1          1H
P1            8.00 usec
PC1          -1.00 dB
SFO1         600.1342009 MHz
P2 - Processing parameter
SI           65336
SF          600.1298338 MHz
WDW          EM
SSB          0
LB           0.30 Hz
GB           0
PC           1.00
JD NMR plot parameters
CX          22.80 cm
CY           2.00 cm
CZ           2.00 cm
T1P         540.17 Hz
F1          -0.500 Hz
F2          -300.06 Hz
PROMCM      0.41667 ppm/cm
HZCM        250.05412 Hz/cm
  
```

# Macrocycle 1c, <sup>1</sup>H NMR spectrum, 2 mM in D<sub>2</sub>O with DSA, 25°C, 600 MHz

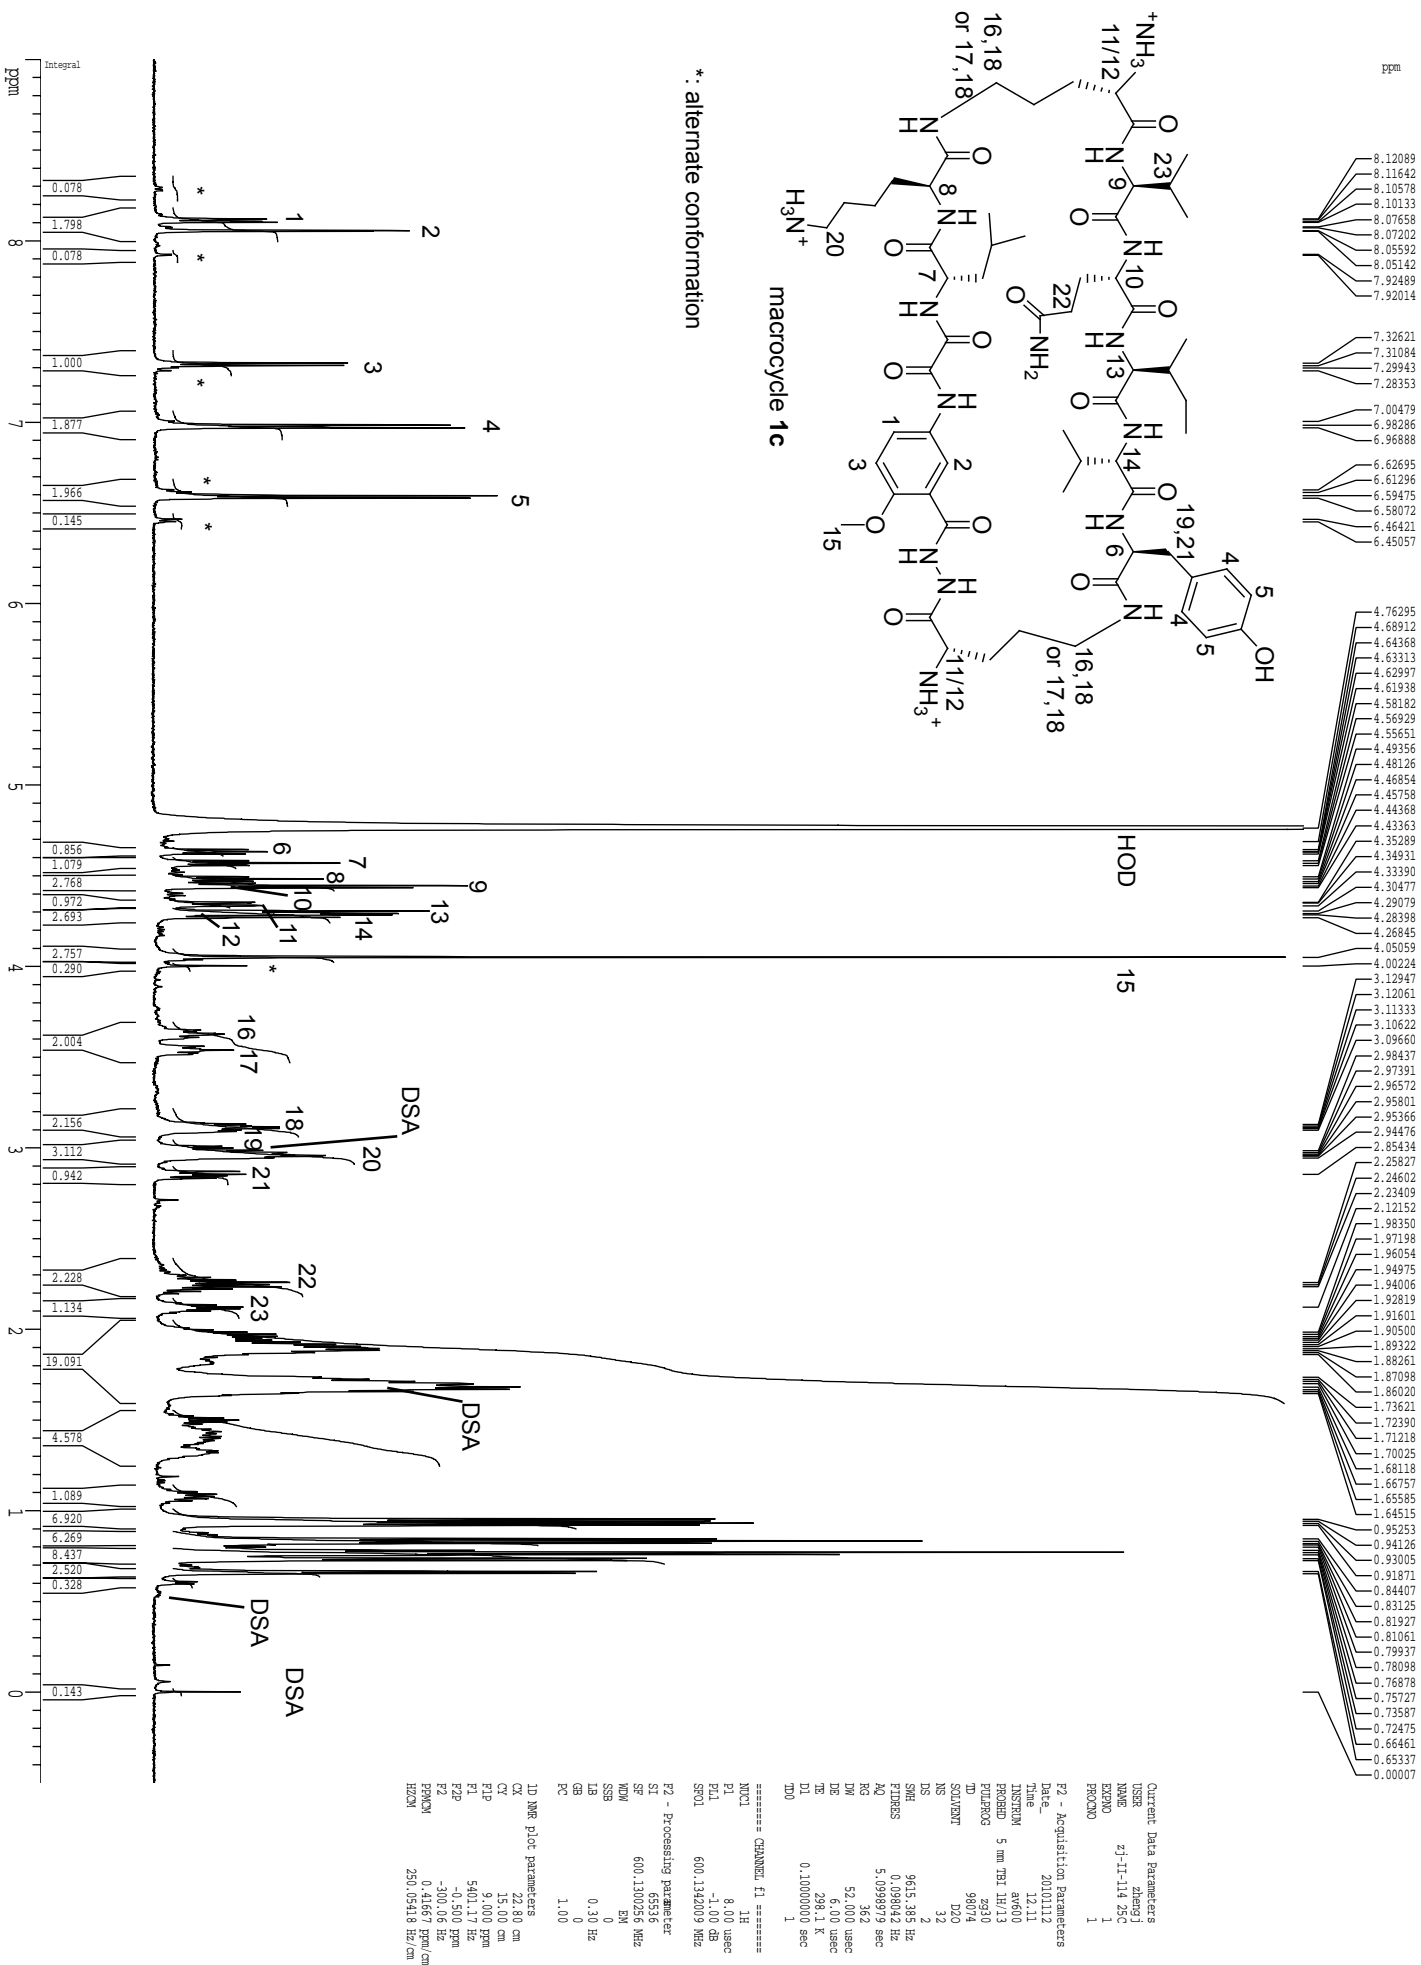

# Macrocycle 1c, <sup>1</sup>H NMR spectrum, 2 mM in D<sub>2</sub>O with DSA, 25°C, 600 MHz

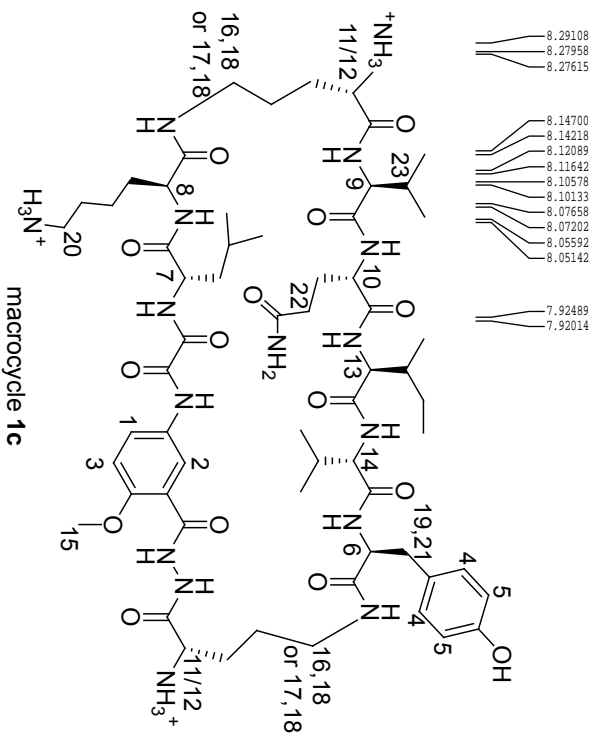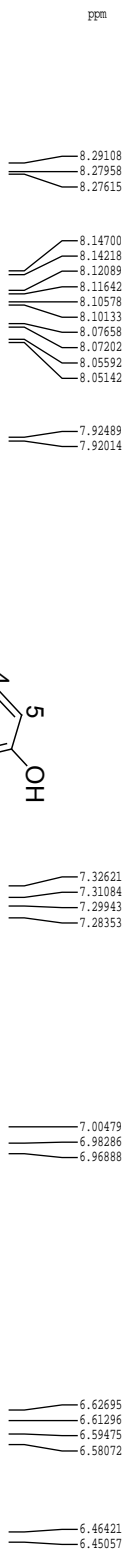

macrocycle 1c

\*: alternate conformation

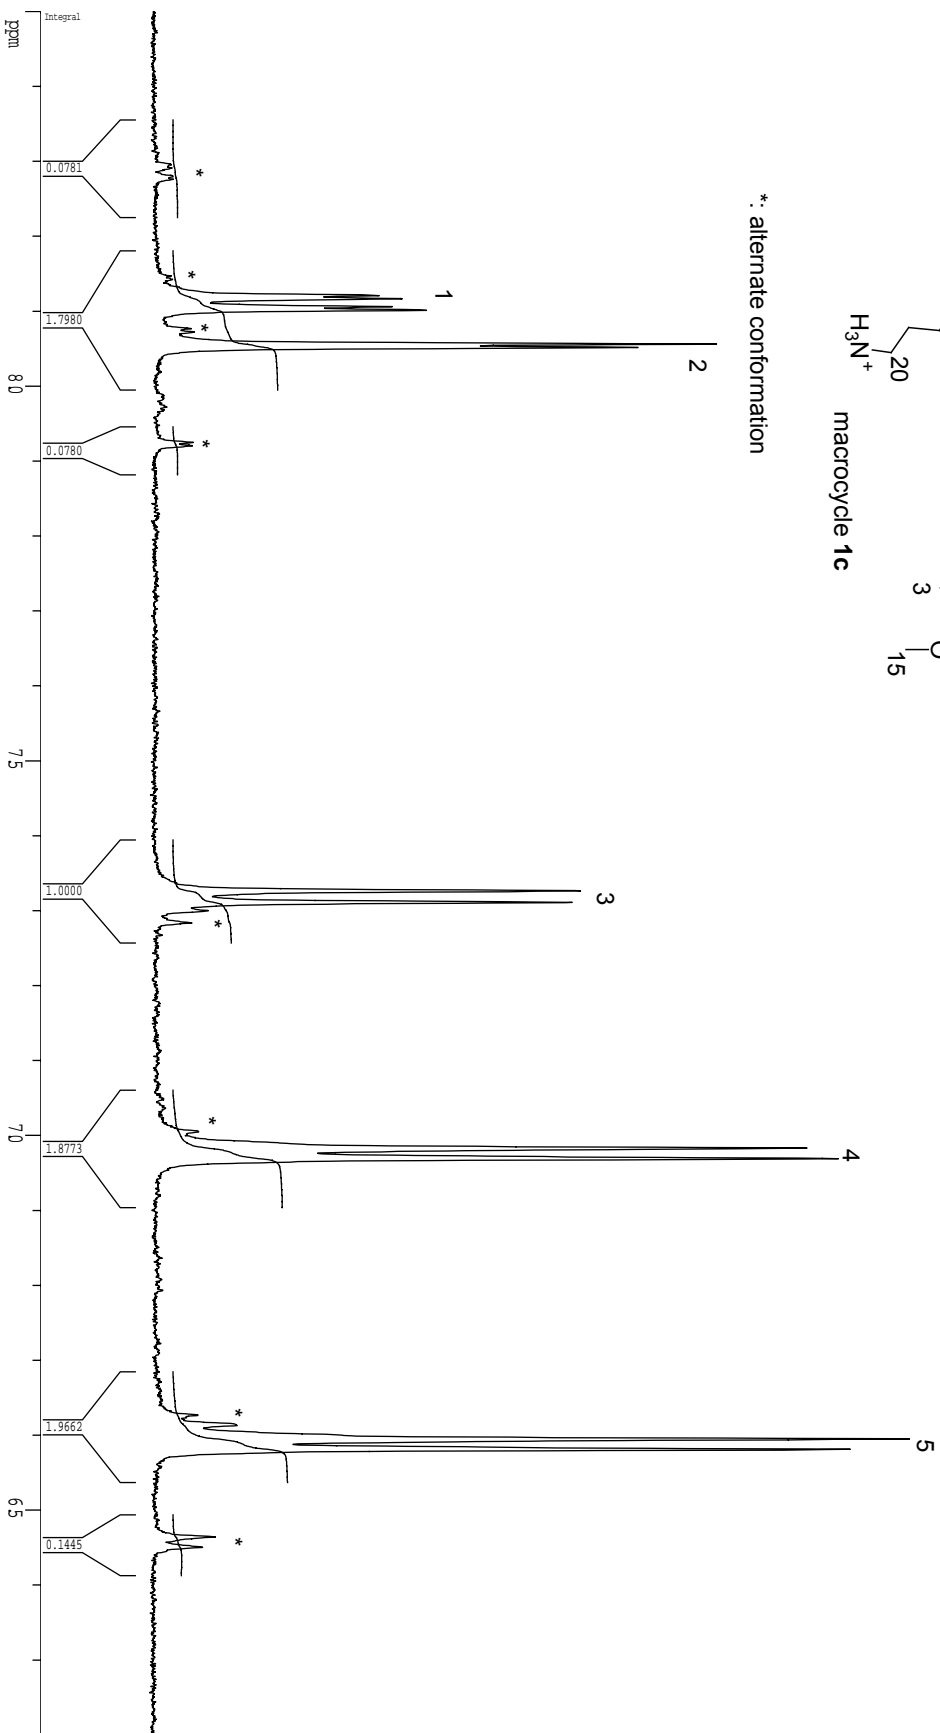

```

Current Data Parameters
USER          zhengj1
NAME          zj-11-14 25C
EXPNO        1
PROCNO       1
F2 - Acquisition Parameters
Date_         20101117
Time         22:01
INSTRUM      spect
PROBHD      5 mm BBI HX13
PULPROG     zgpg30
TD           65536
SOLVENT     D2O
NS           32
DS           2
SWH          9615.385 Hz
FIDRES      0.098042 Hz
AQ           5.0998979 sec
RG           362
DM           52.000 usec
DE           6.00 usec
TE           298.1 K
D1           0.10000009 sec
D10          1

===== CHANNEL f1 =====
NUC1         1H
P1           8.00 usec
PL1         -1.00 dB
SFO1         600.1362009 MHz

F2 - Processing parameters
SI           65536
SF           600.1300256 MHz
WDW          EM
SSB          0
LB           0.30 Hz
GB           0
PC           1.00

JD NMR plot parameters
CX           22.80 cm
CT           20.00 cm
C1P         7.000 Hz
F1          5101.00 Hz
F2P         6.200 Hz
F3          3720.81 Hz
PRGCM       0.10088 ppm/cm
HZCM        60.53944 Hz/cm
    
```

# Macrocycle 1c, <sup>1</sup>H NMR spectrum, 2 mM in D<sub>2</sub>O with DSA, 25°C, 600 MHz

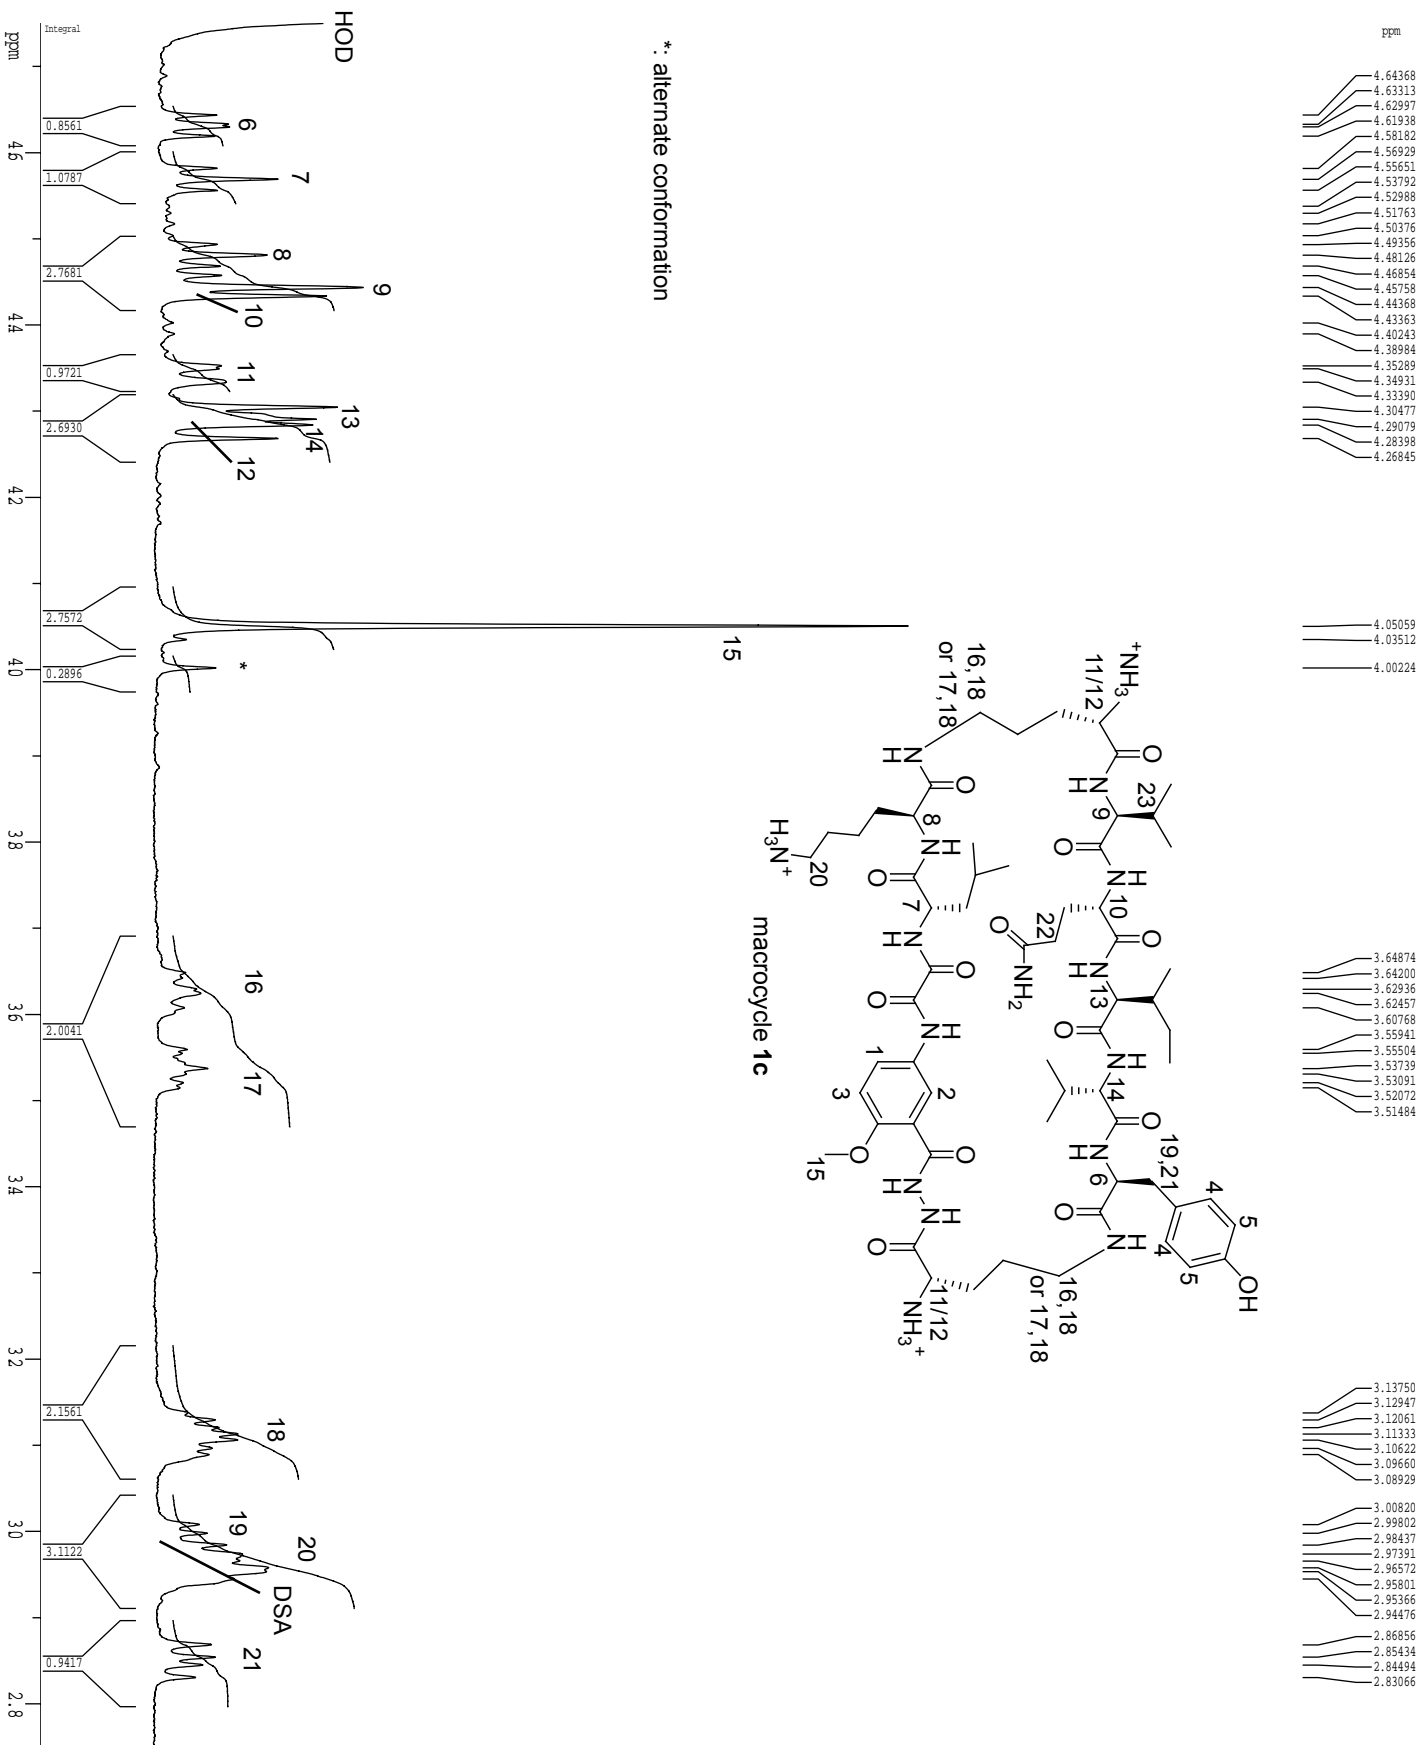

\*: alternate conformation

```

Current Data Parameters
USER          zhangj1
NAME          zj-11-14 25C
EXPNO        1
PROCNO       1
F2 - Acquisition Parameters
Date_         20101112
Time         12:01
INSTRUM      spect
PROBHD      5 mm TBI HX13
PULPROG     zg30
TD           65536
SOLVENT     D2O
NS           32
DS           2
SWH          9615.385 Hz
FIDRES      0.098042 Hz
AQ          5.0999979 sec
RG           362
DW          52.000 usec
DE          6.00 usec
TE          298.1 K
D1          0.10000000 sec
D10         1
----- CHANNEL f1 -----
NUC1         1H
P1           8.00 usec
PL1         -1.00 dB
SFO1         600.1342009 MHz
F2 - Processing parameters
SI           65536
SF           600.1300256 MHz
WDW          EM
SSB          0
LB           0.30 Hz
GB           0
PC           1.00
JD NMR plot parameters
CX           22.80 cm
CY           22.80 cm
CZ           22.80 cm
CTP         47.00 cm
EI          2850.43 Hz
F1P         2.756 Hz
F2          1650.36 Hz
P1MCM       0.087772 ppm/cm
HZMCM       52.64229 Hz/cm
  
```

# Macrocycle 1c, <sup>1</sup>H NMR spectrum, 2 mM in D<sub>2</sub>O with DSA, 25°C, 600 MHz

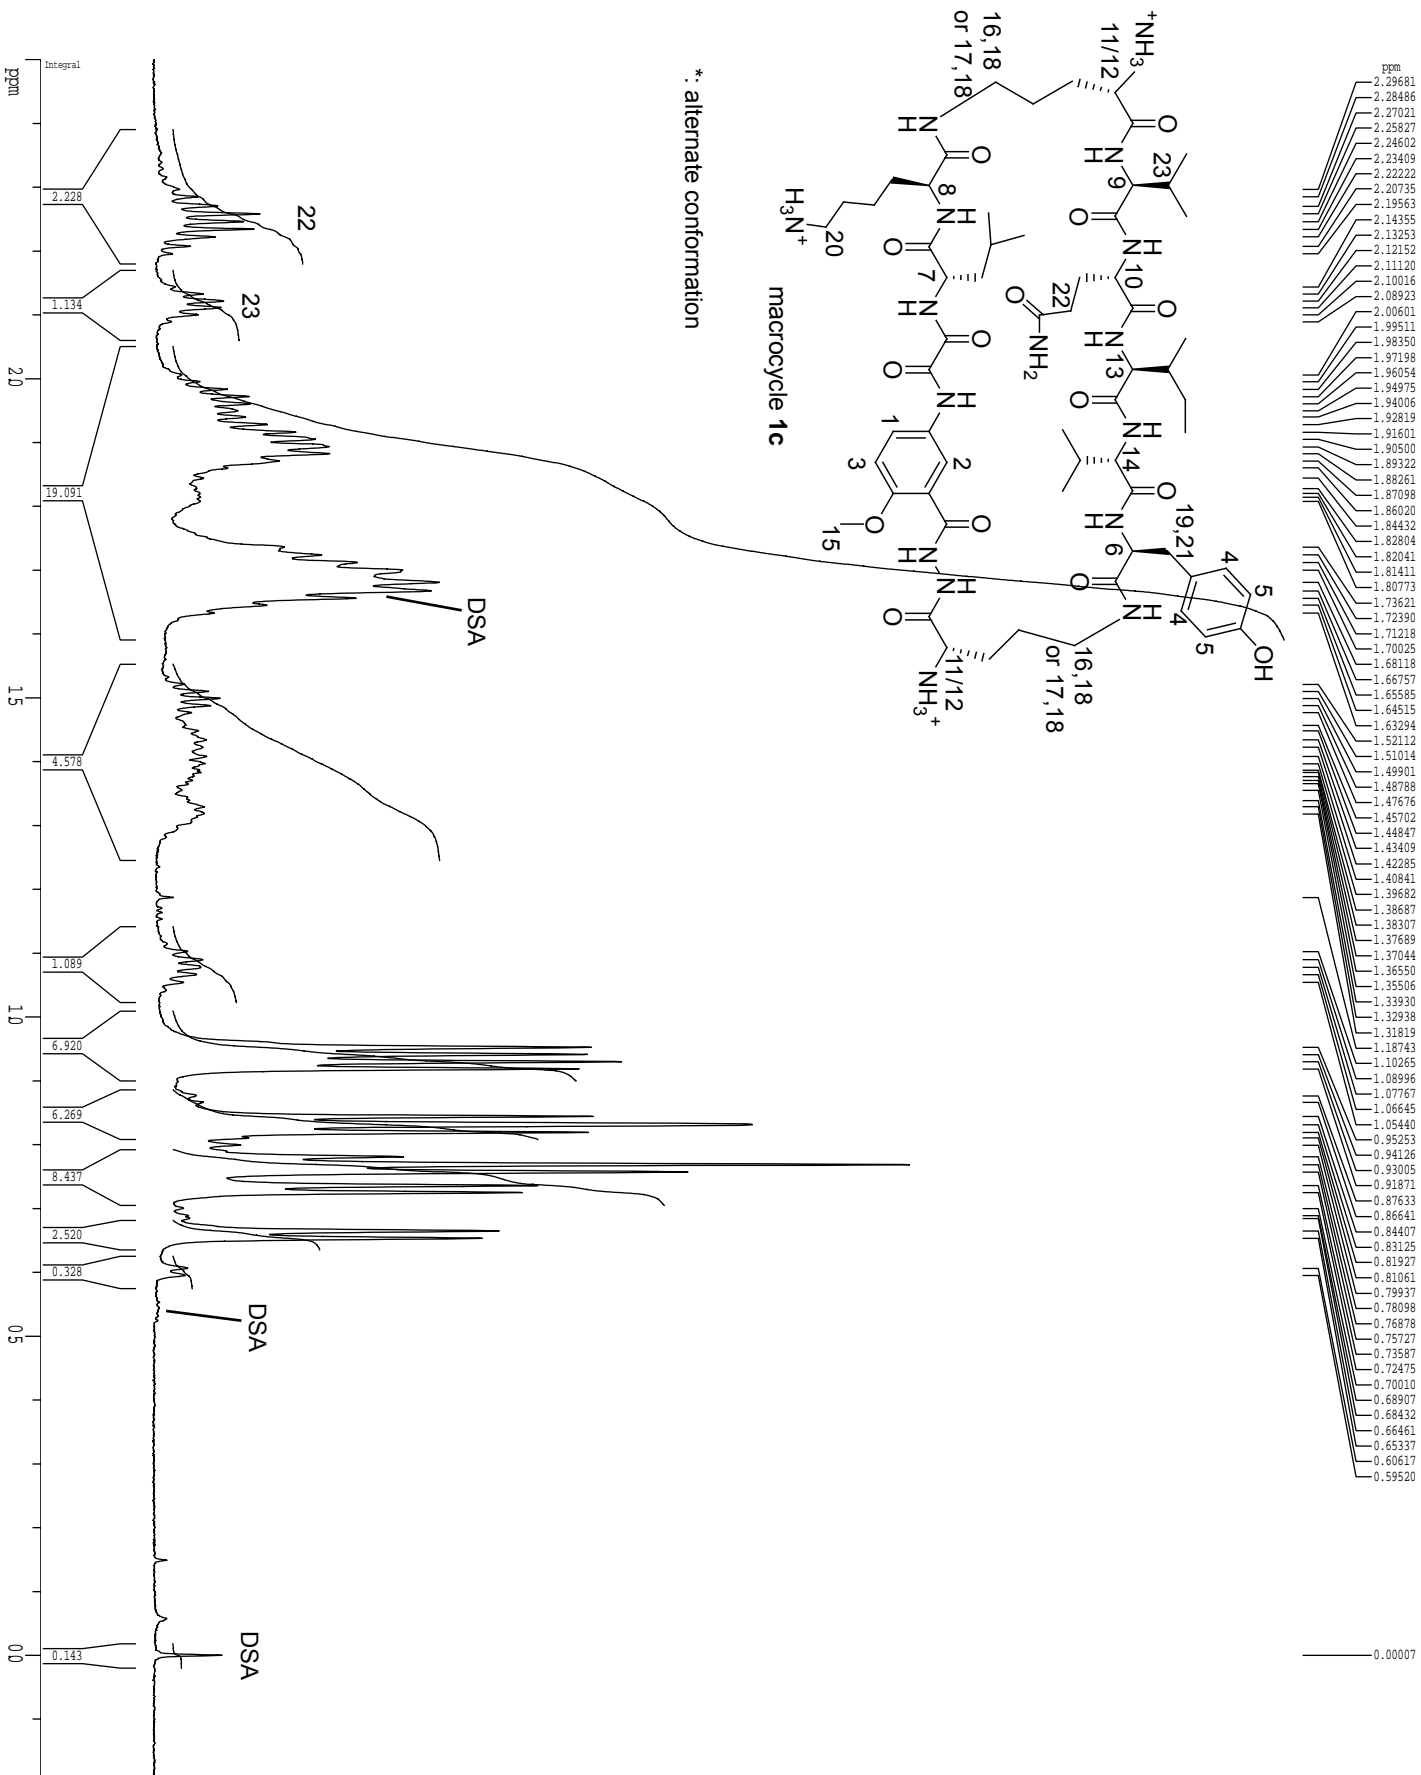

ppm

|         |
|---------|
| 2.28581 |
| 2.28486 |
| 2.27021 |
| 2.25827 |
| 2.24602 |
| 2.23409 |
| 2.22222 |
| 2.20735 |
| 2.14355 |
| 2.13253 |
| 2.12152 |
| 2.11120 |
| 2.10016 |
| 2.08923 |
| 2.00601 |
| 1.99511 |
| 1.98350 |
| 1.97198 |
| 1.96054 |
| 1.94975 |
| 1.94006 |
| 1.92819 |
| 1.91601 |
| 1.90500 |
| 1.89322 |
| 1.88261 |
| 1.87098 |
| 1.86020 |
| 1.84432 |
| 1.82804 |
| 1.82041 |
| 1.81411 |
| 1.80773 |
| 1.79621 |
| 1.72390 |
| 1.71218 |
| 1.70025 |
| 1.68118 |
| 1.66757 |
| 1.65585 |
| 1.64515 |
| 1.63294 |
| 1.52112 |
| 1.51014 |
| 1.49901 |
| 1.48788 |
| 1.47676 |
| 1.45702 |
| 1.44847 |
| 1.43409 |
| 1.42285 |
| 1.40841 |
| 1.39682 |
| 1.38687 |
| 1.38307 |
| 1.37689 |
| 1.37044 |
| 1.36550 |
| 1.35506 |
| 1.33930 |
| 1.32938 |
| 1.31819 |
| 1.18743 |
| 1.10265 |
| 1.08996 |
| 1.07767 |
| 1.06645 |
| 1.05440 |
| 0.95253 |
| 0.94126 |
| 0.93005 |
| 0.91871 |
| 0.87633 |
| 0.86541 |
| 0.84407 |
| 0.83125 |
| 0.81927 |
| 0.81061 |
| 0.79937 |
| 0.78098 |
| 0.76878 |
| 0.75727 |
| 0.73587 |
| 0.72475 |
| 0.70010 |
| 0.68907 |
| 0.68432 |
| 0.65337 |
| 0.60617 |
| 0.59520 |
| 0.00007 |

\*. alternate conformation

Current Data Parameters  
 USER zhangj1  
 NAME zj-11-14 25c  
 EXPNO 1  
 PROCNO 1

F2 - Acquisition Parameters  
 Date\_ 20101112  
 Time 22:11  
 INSTRUM spect  
 PROBRD 5 mm TBI HX/13  
 PULPROG zgpg30  
 TD 65536  
 SOLVENT D2O  
 NS 32  
 DS 2  
 SWH 9615.385 Hz  
 FIDRES 0.098042 Hz  
 AQ 0.099979 sec  
 RG 362  
 DW 52.000 usec  
 DE 6.00 usec  
 TE 298.1 K  
 D1 0.10000000 sec  
 D10 1

\*\*\*\*\* CHANNEL f1 \*\*\*\*\*  
 NUC1 <sup>1</sup>H  
 P1 8.00 usec  
 PL1 -1.00 dB  
 SFO1 600.1362009 MHz

F2 - Processing parameter  
 SI 65536  
 SF 600.1300256 MHz  
 WDW EM  
 SSB 0  
 LB 0.30 Hz  
 GB 0  
 PC 1.00

JD NMR plot parameters  
 CZ 22.80 cm  
 CT 20.00 cm  
 CTP 2.50 Hz  
 F1 150.00 Hz  
 F2 -0.200 Hz  
 F3 -120.03 Hz  
 FWHM 0.11842 ppm/cm  
 HZCM 71.06803 Hz/cm

# Macrocycle 1c, TOCSY spectrum, 2 mM in D<sub>2</sub>O, 25°C, 500 MHz, 150 ms mixing time

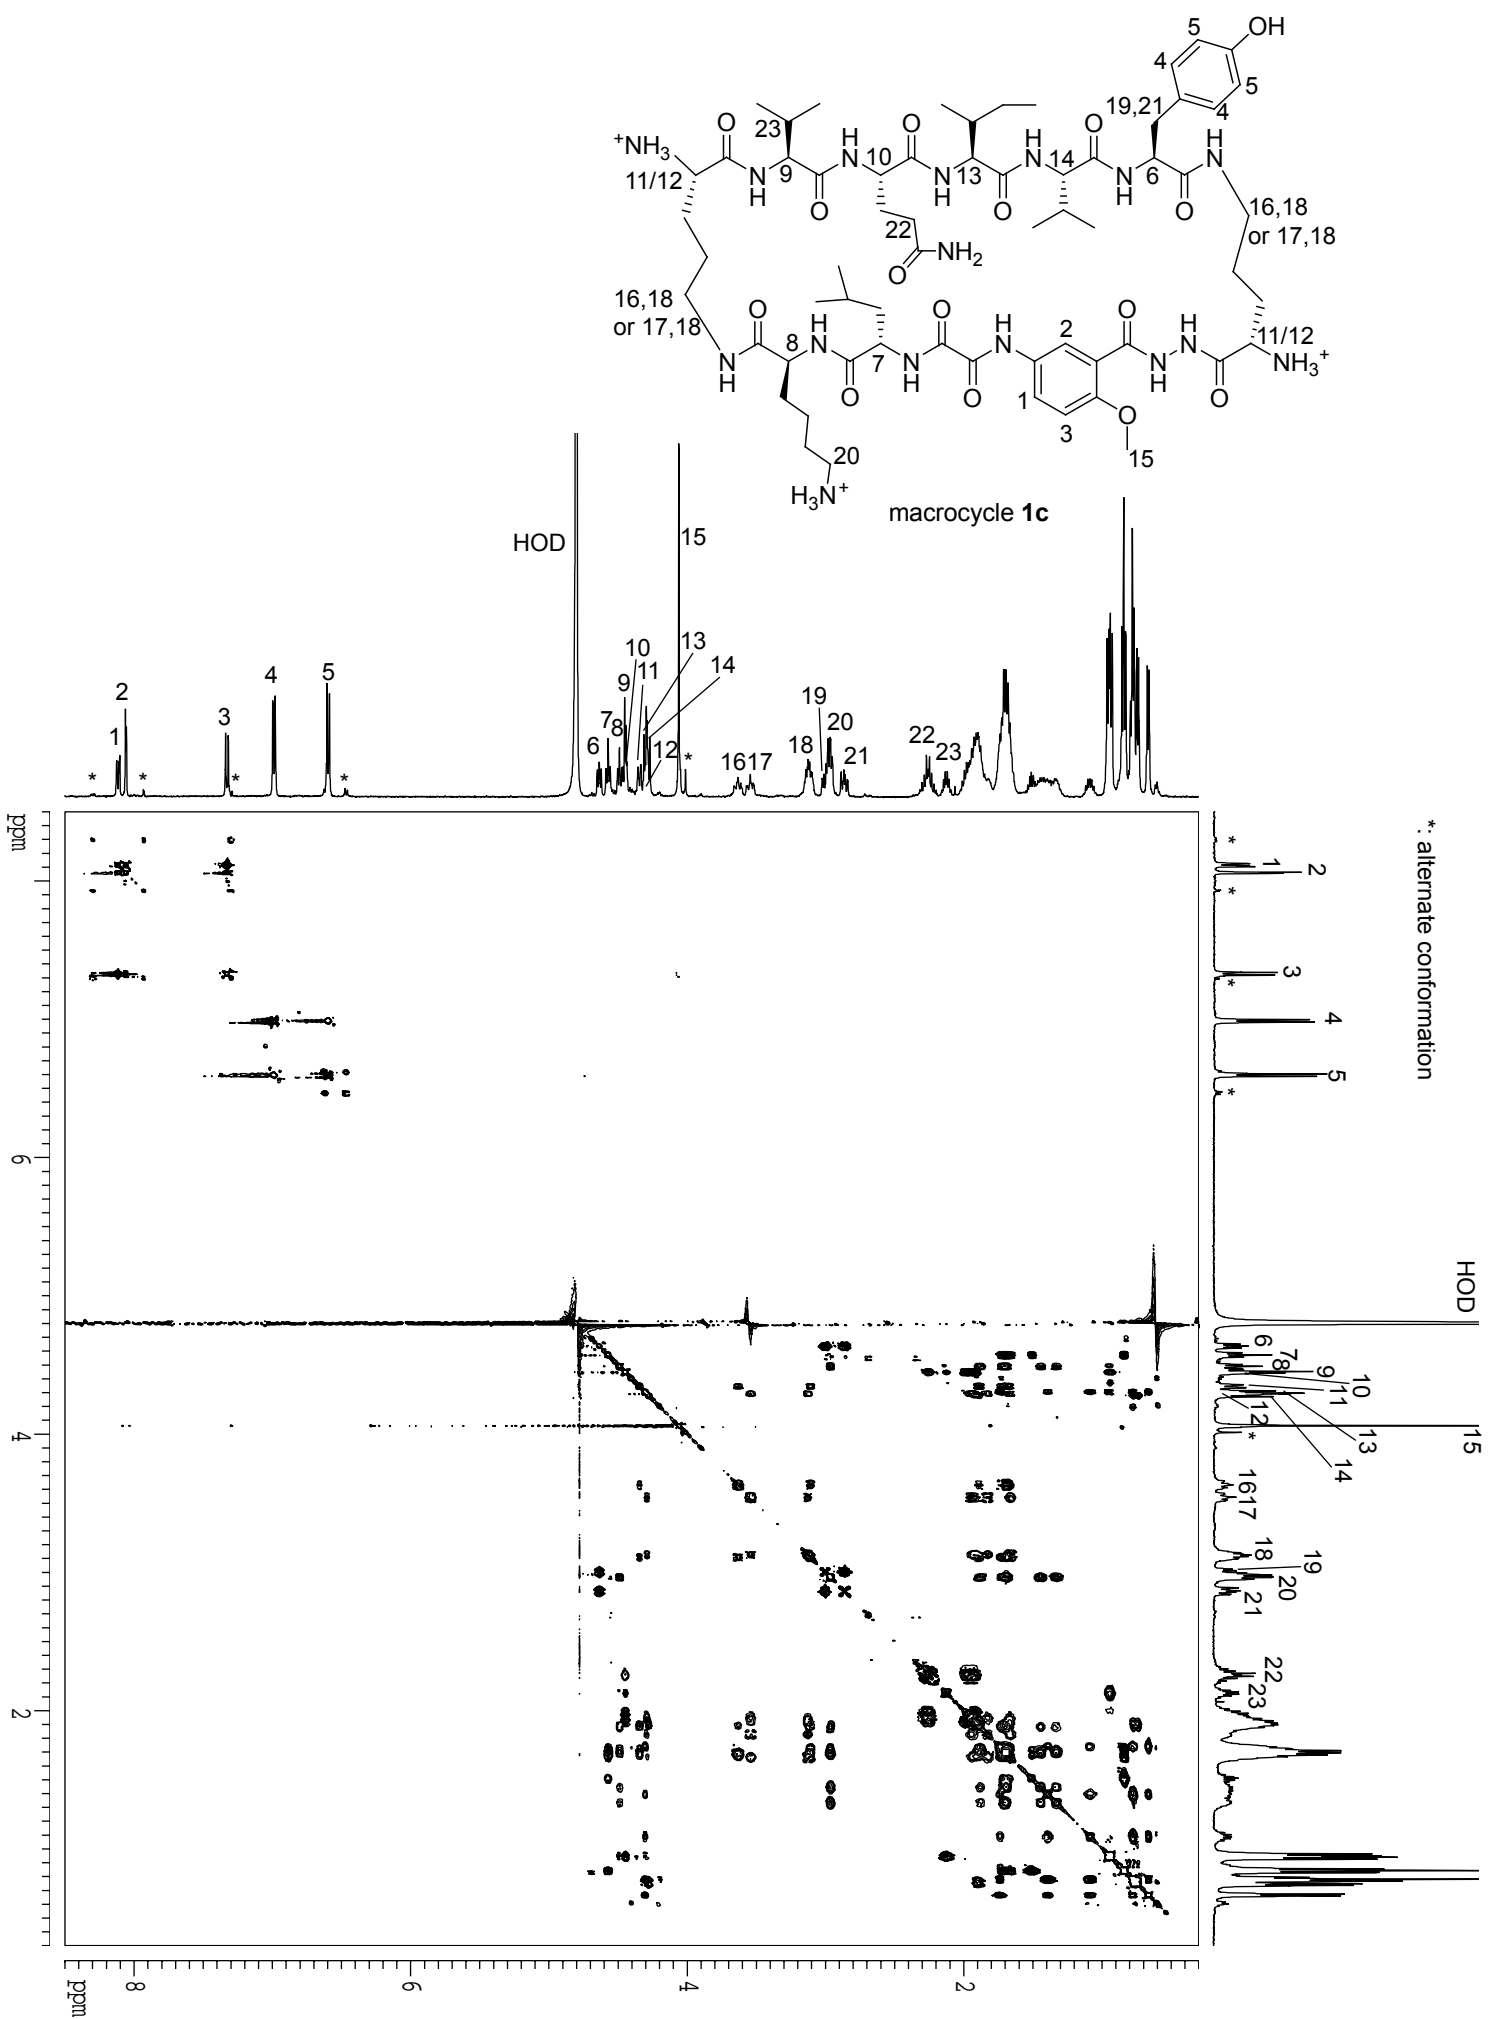

Macrocycle **1c**, TOCSY spectrum, 2 mM in D<sub>2</sub>O, 25°C, 500 MHz, 150 ms mixing time

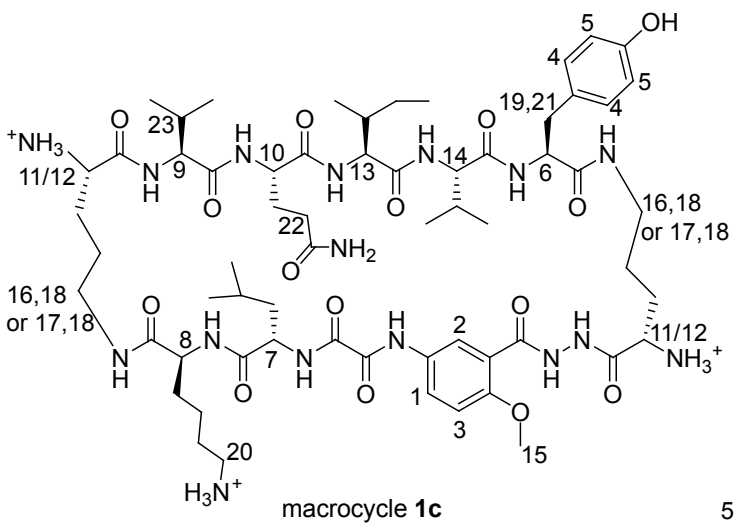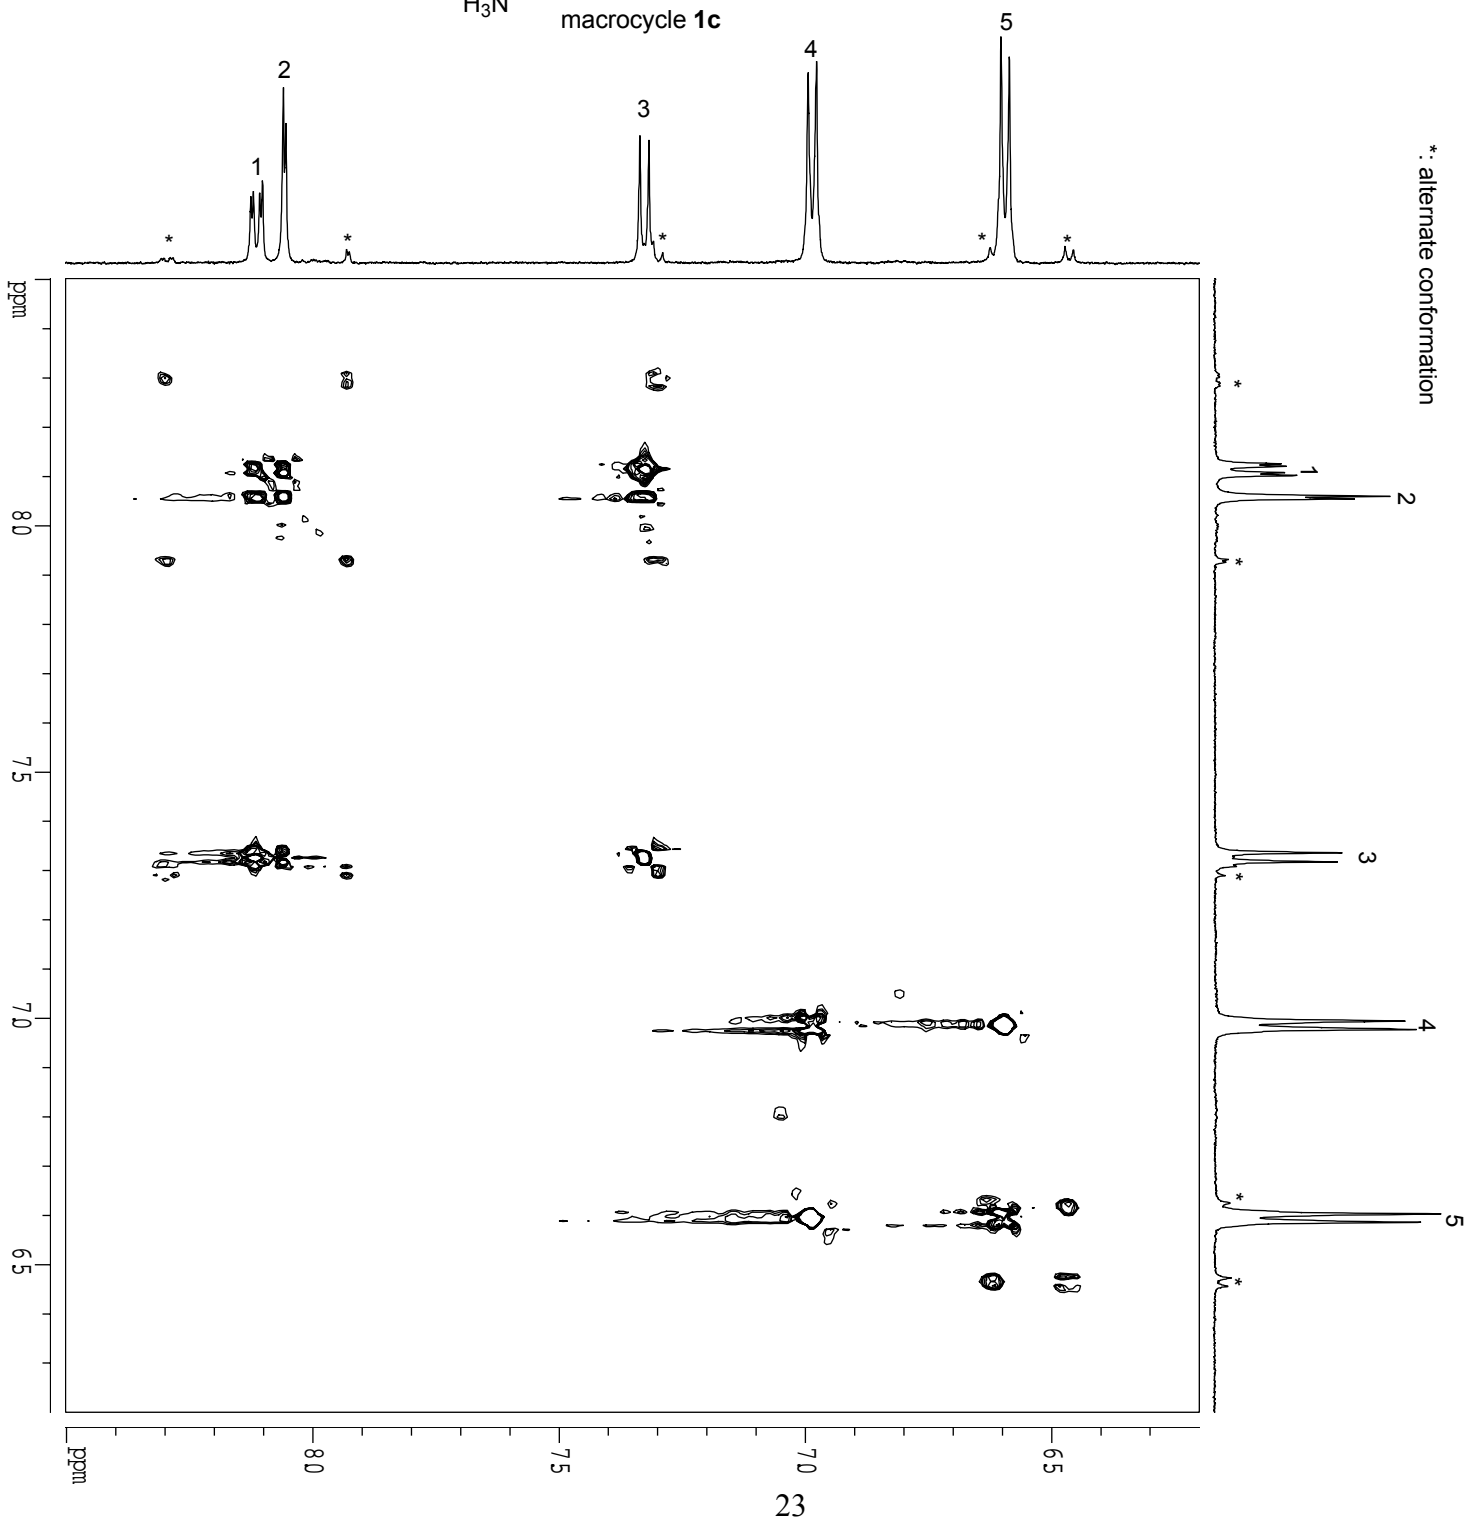

Macrocycle **1c**, TOCSY spectrum, 2 mM in D<sub>2</sub>O, 25°C, 500 MHz, 150 ms mixing time

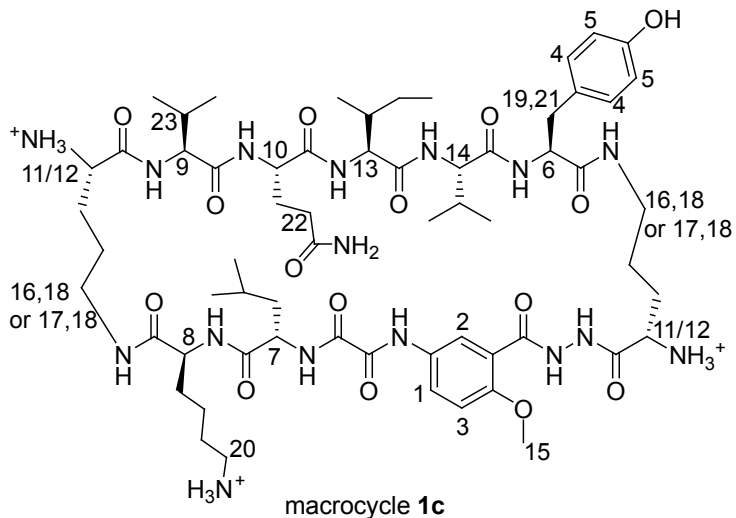

macrocycle **1c**

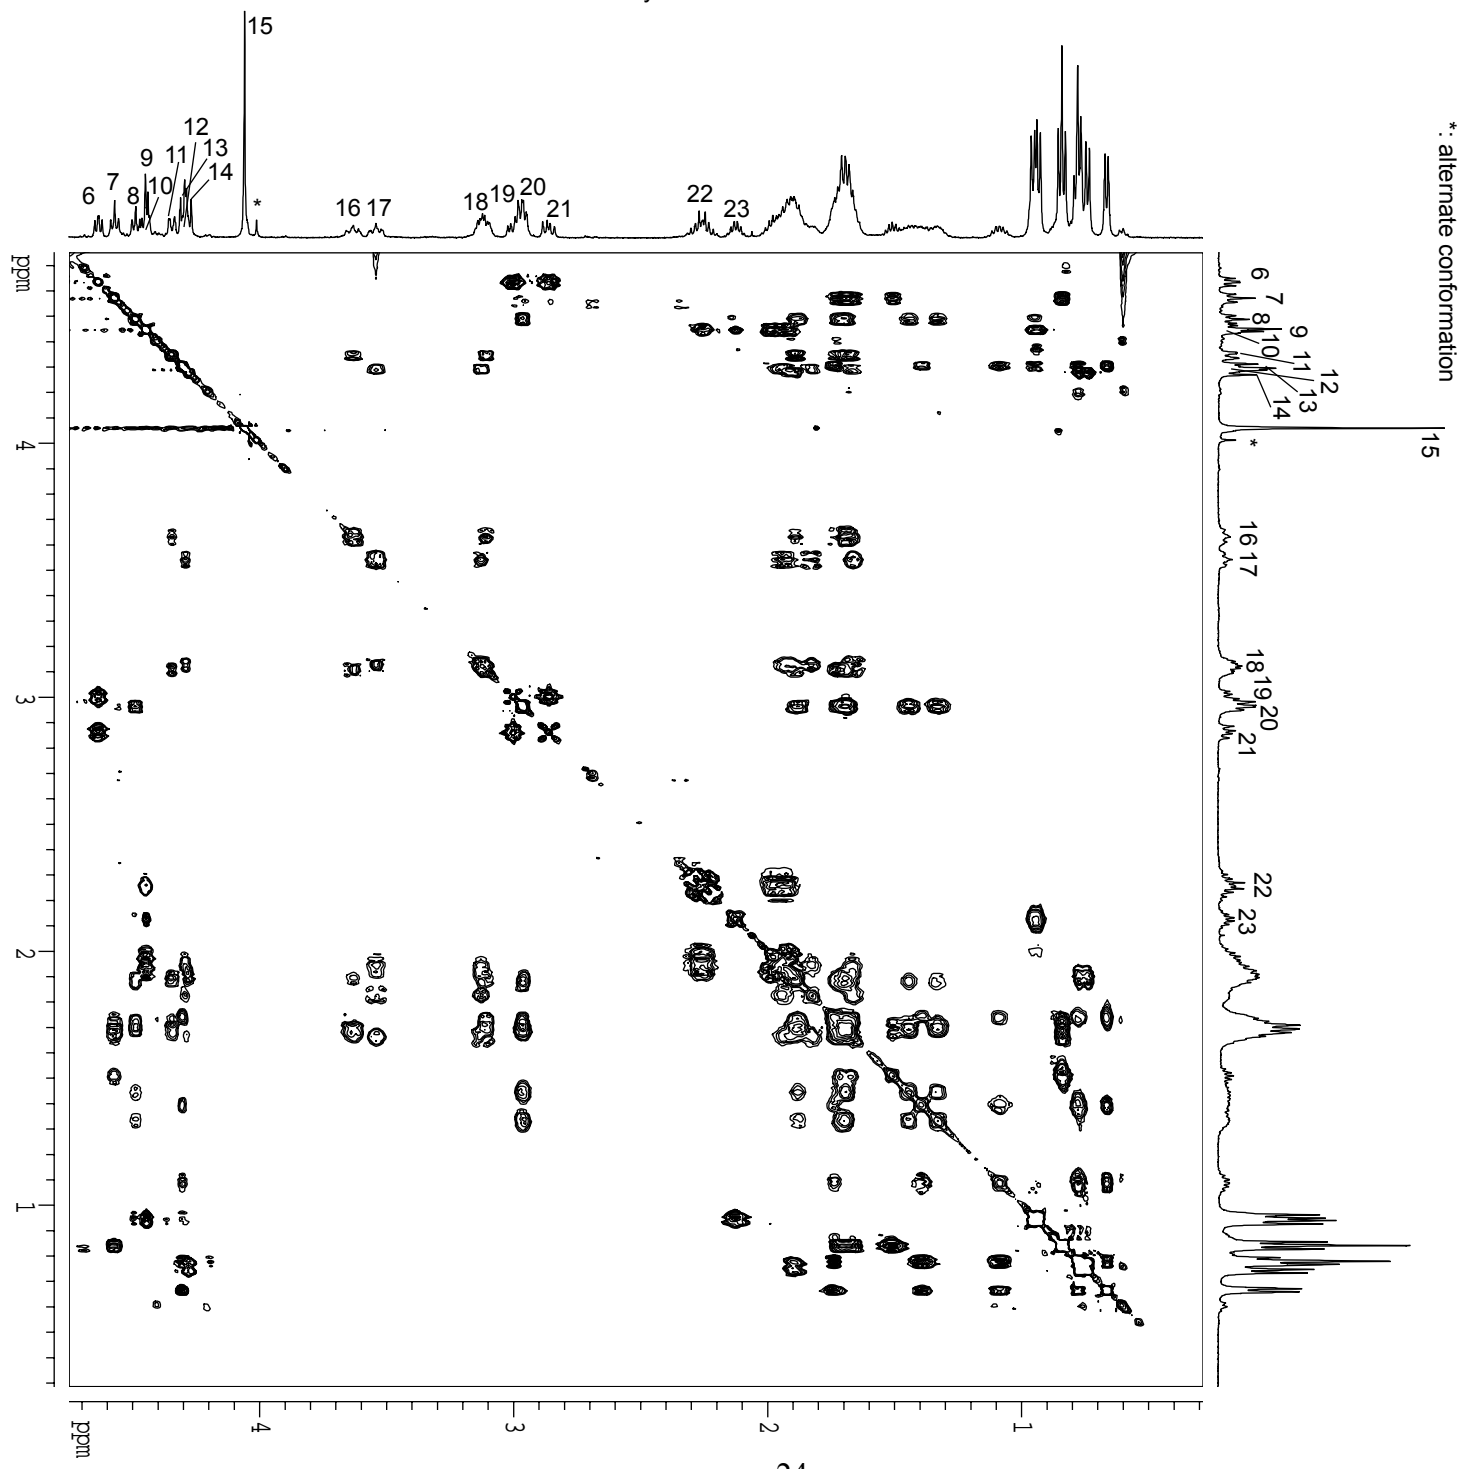



# Macrocycle 1c, ROESY spectrum, 2 mM in D<sub>2</sub>O with DSA, 6°C, 600 MHz, 250 ms mixing time

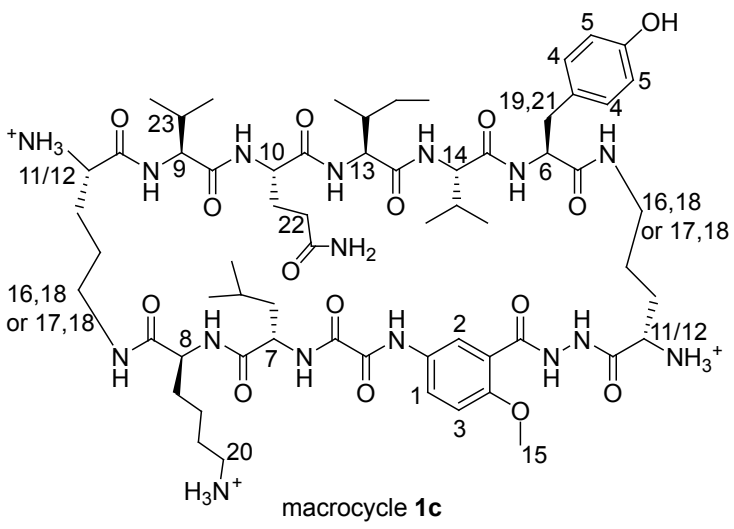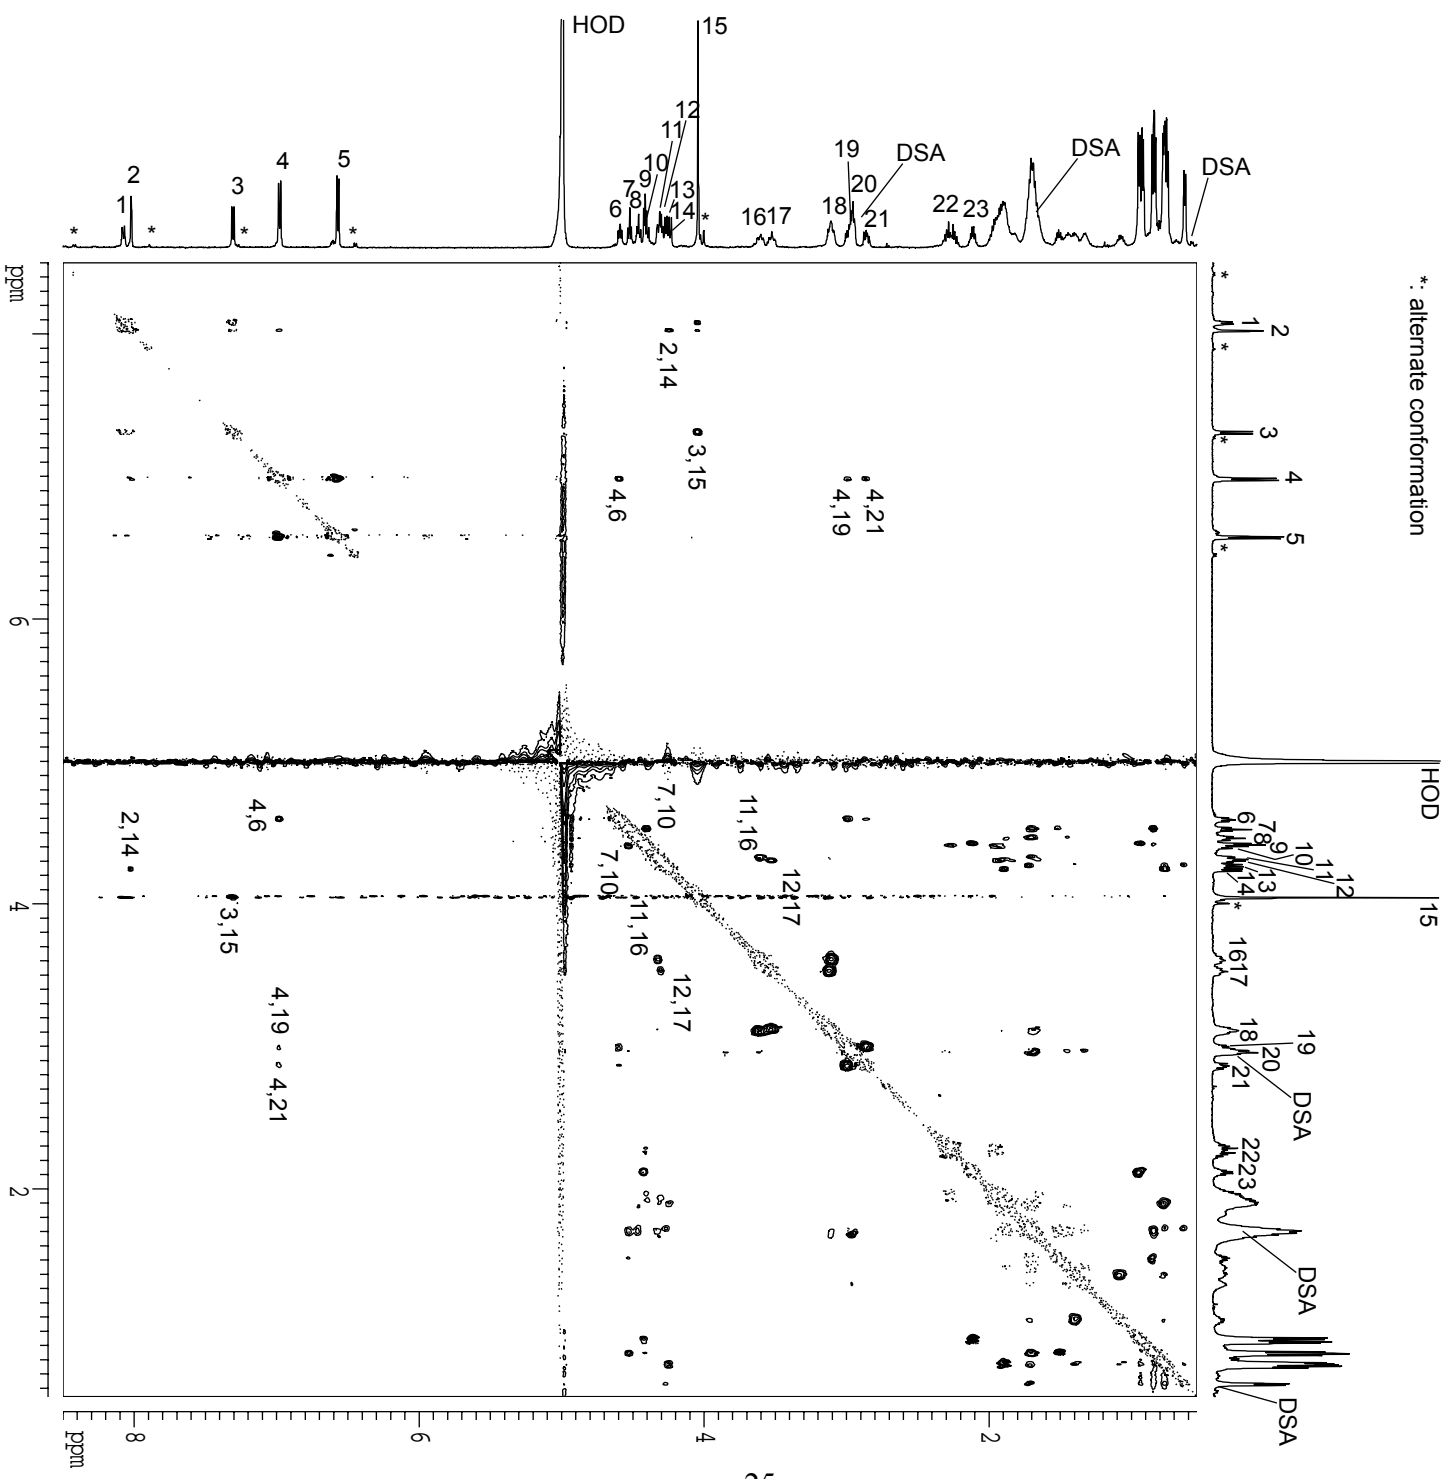

Macrocycle **1c**, ROESY spectrum, 2 mM in D<sub>2</sub>O with DSA, 6°C, 600 MHz, 250 ms mixing time

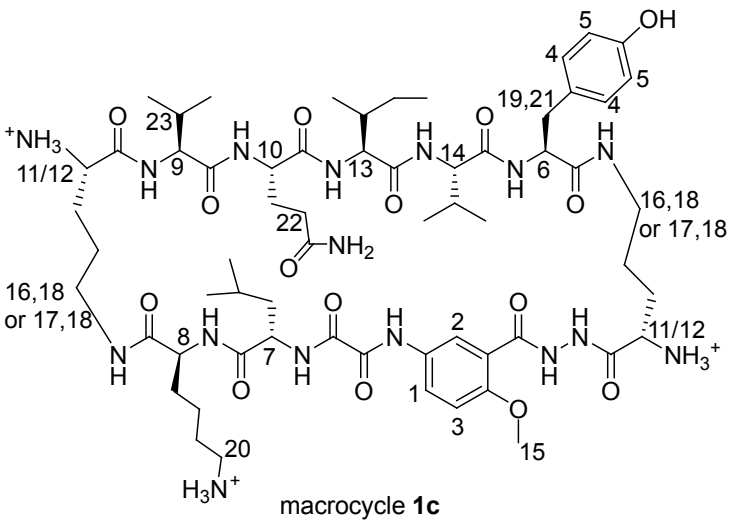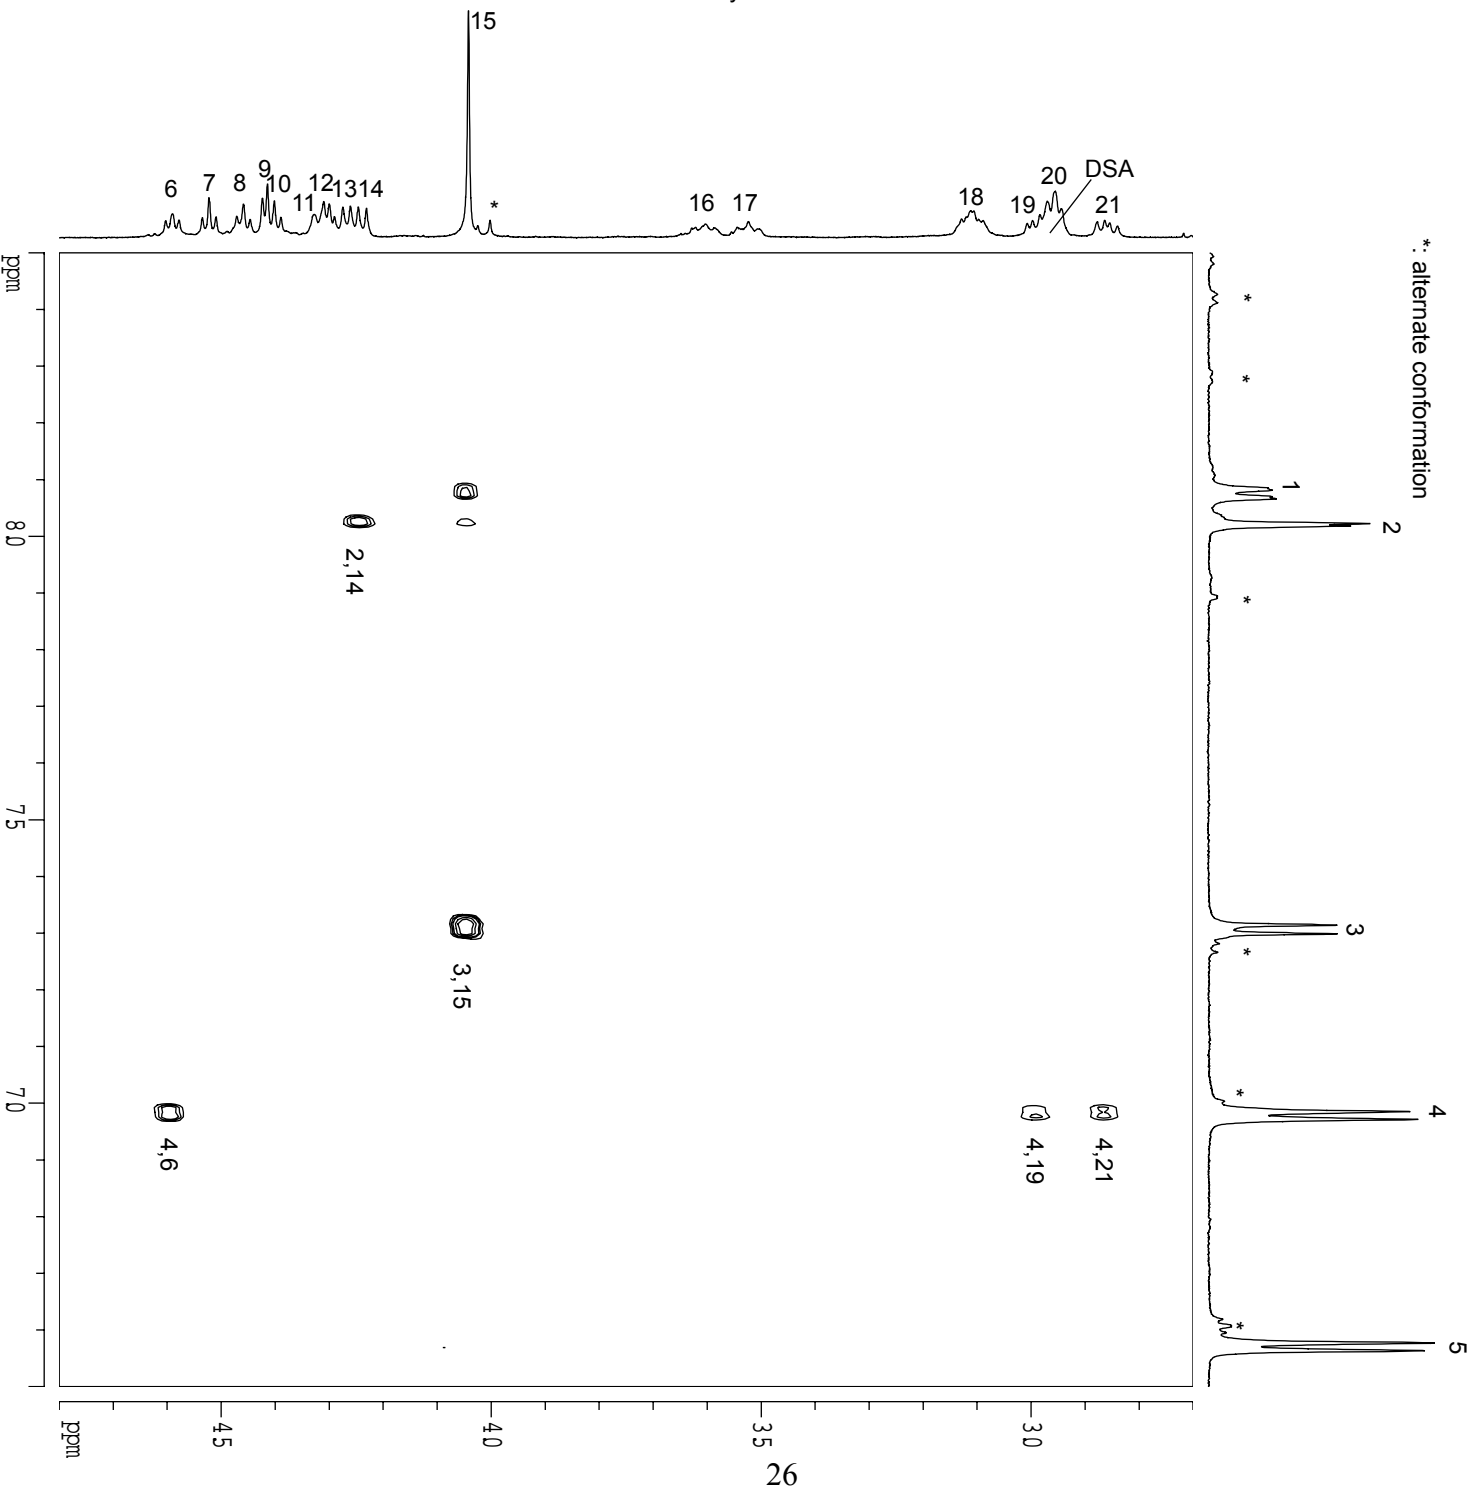

Macrocycle **1c**, ROESY spectrum, 2 mM in D<sub>2</sub>O with DSA, 6°C, 600 MHz, 250 ms mixing time

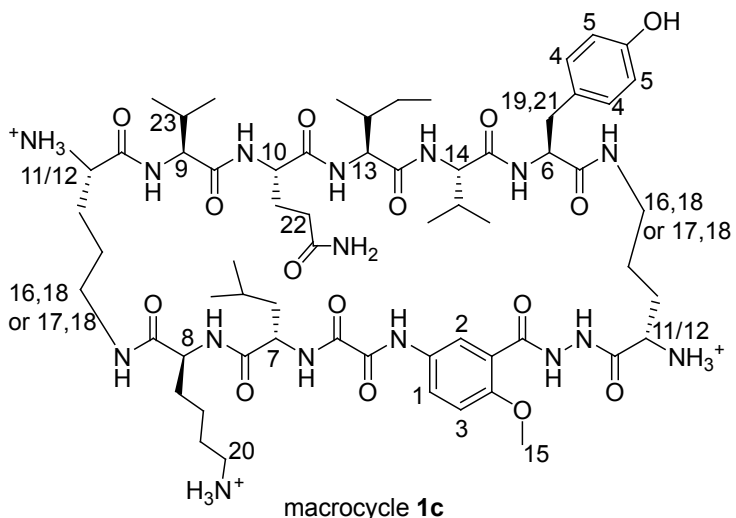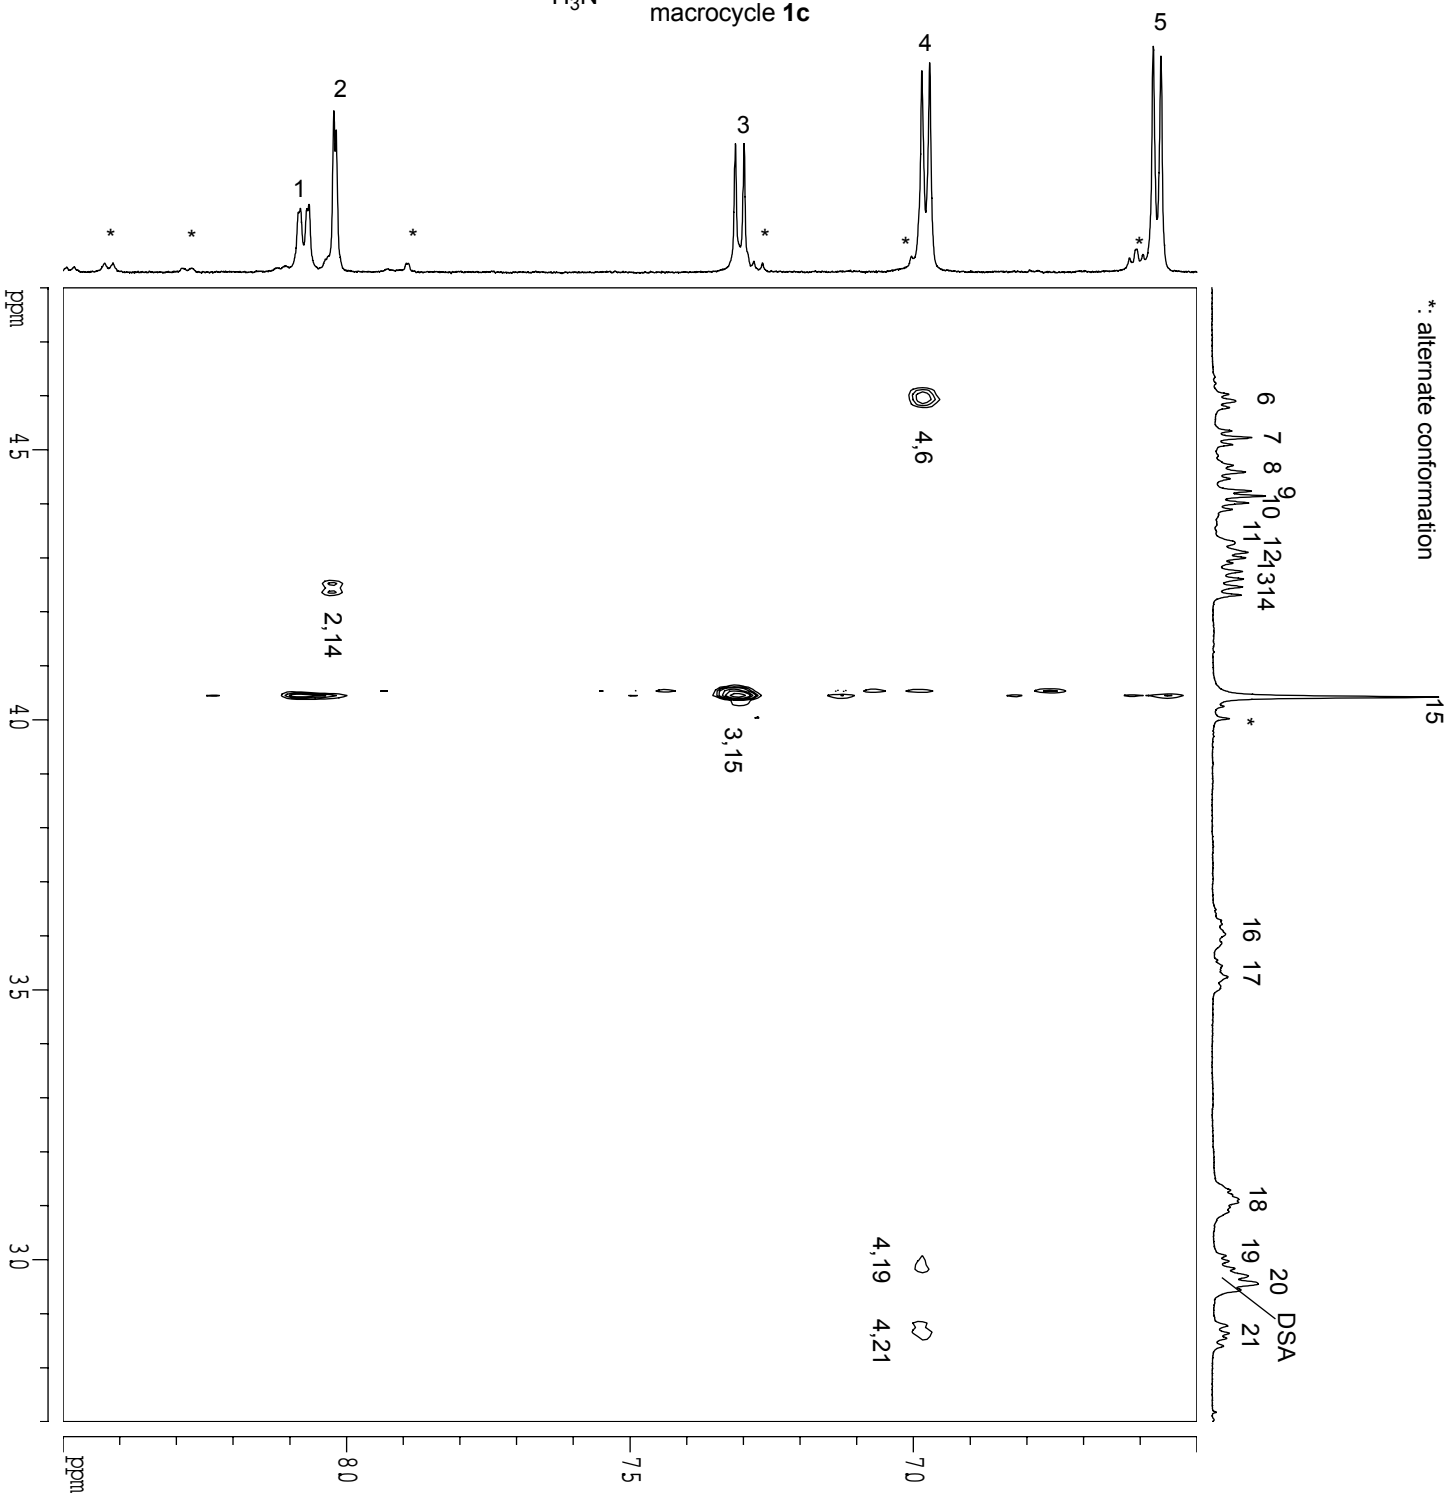

Macrocycle **1c**, ROESY spectrum, 2 mM in D<sub>2</sub>O with DSA, 6°C, 600 MHz, 250 ms mixing time

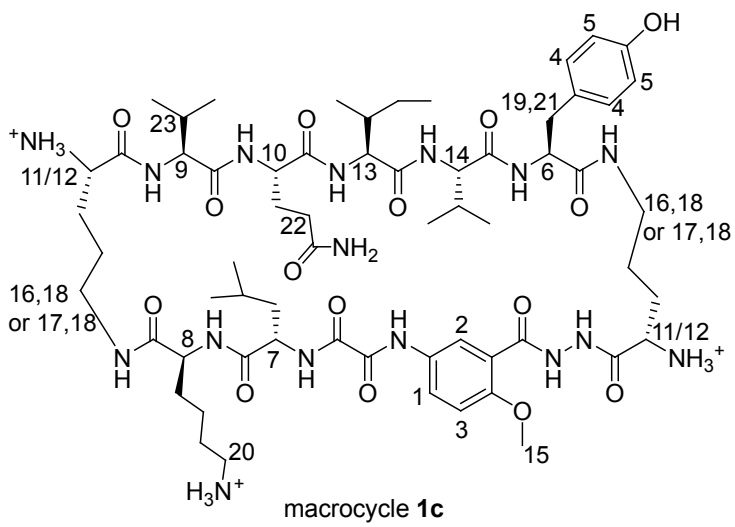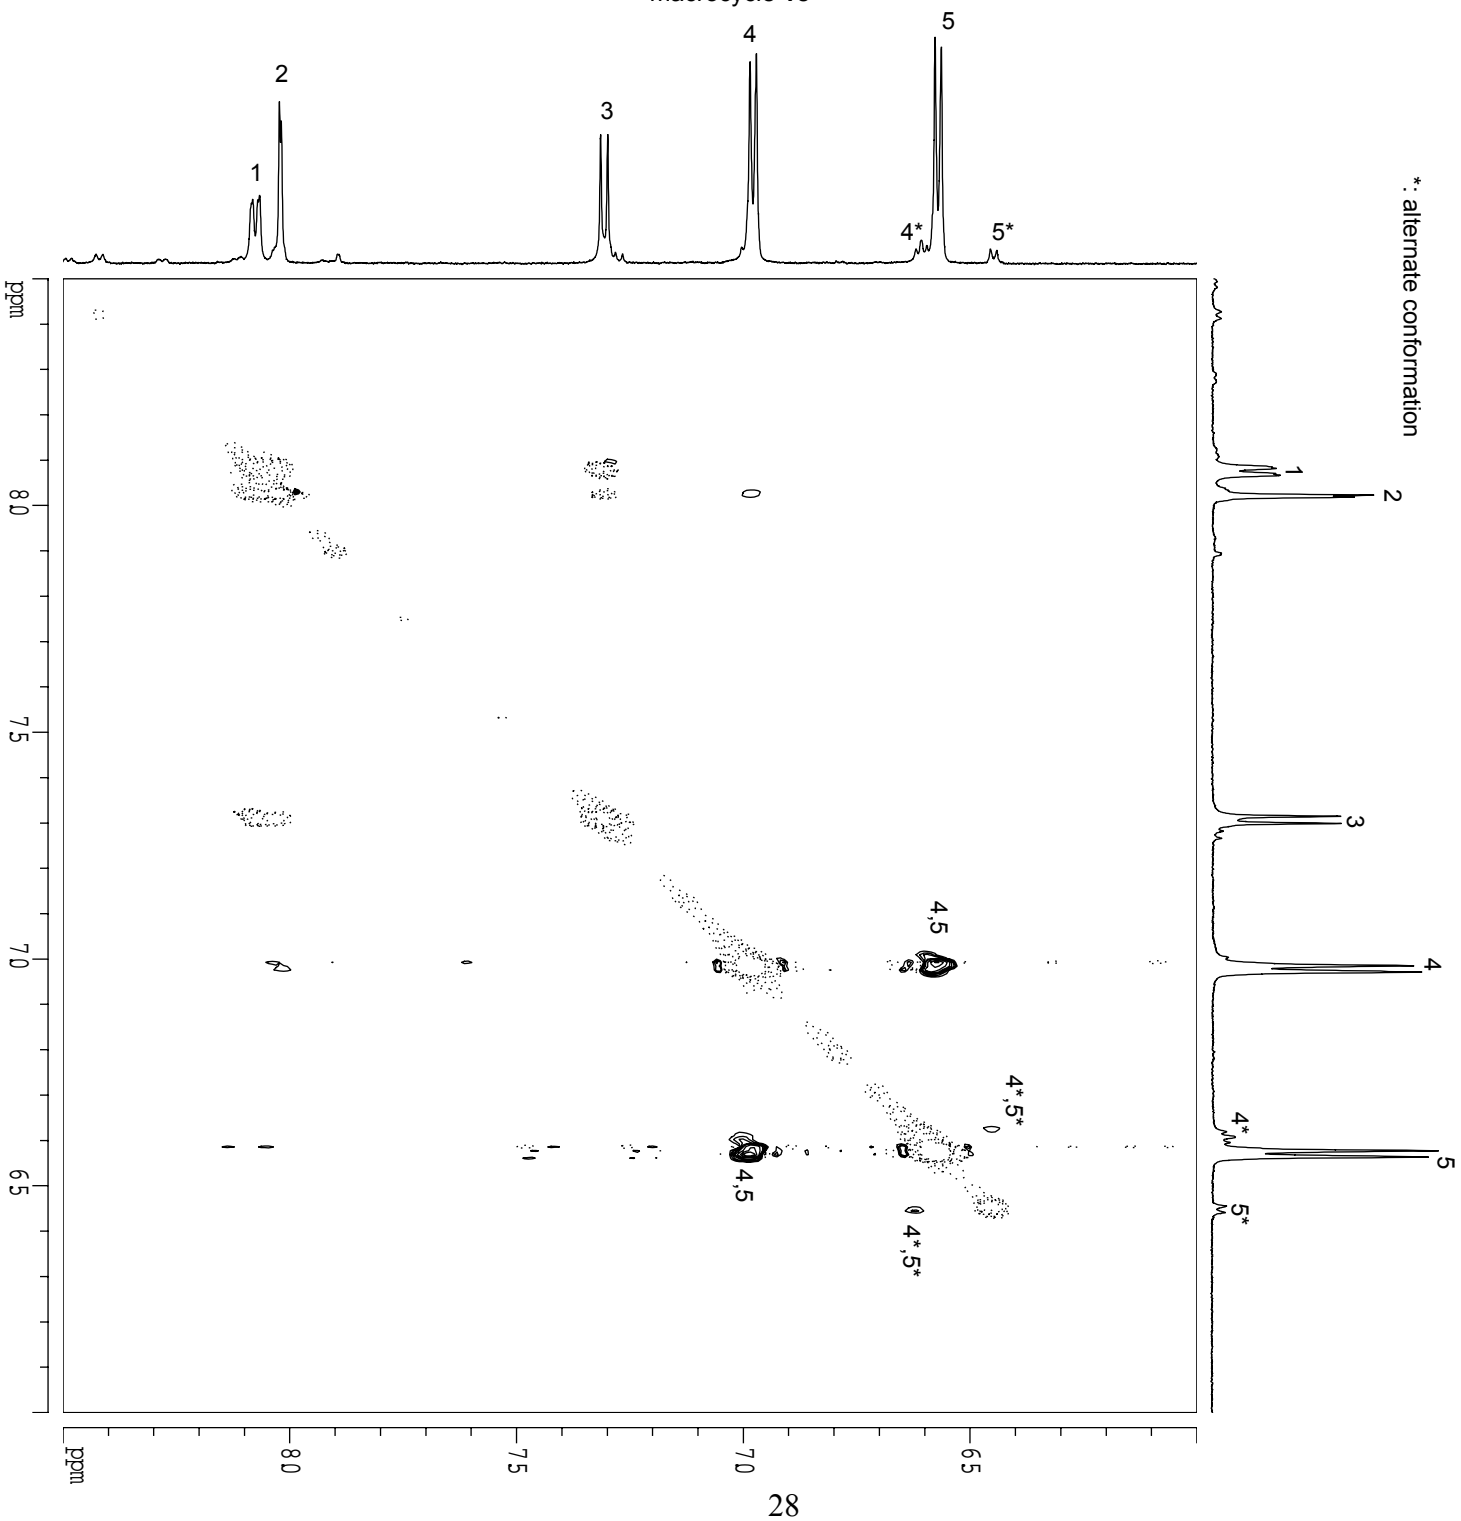

\*: alternate conformation

Macrocycle **1c**, ROESY spectrum, 2 mM in D<sub>2</sub>O with DSA, 6°C, 600 MHz, 250 ms mixing time

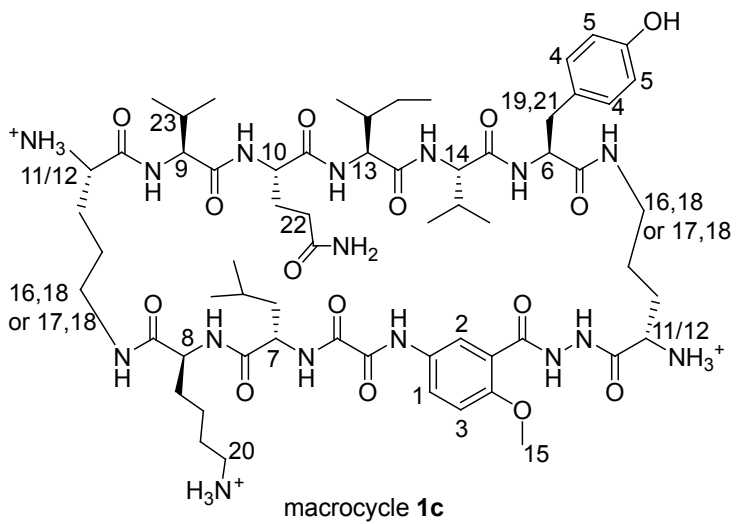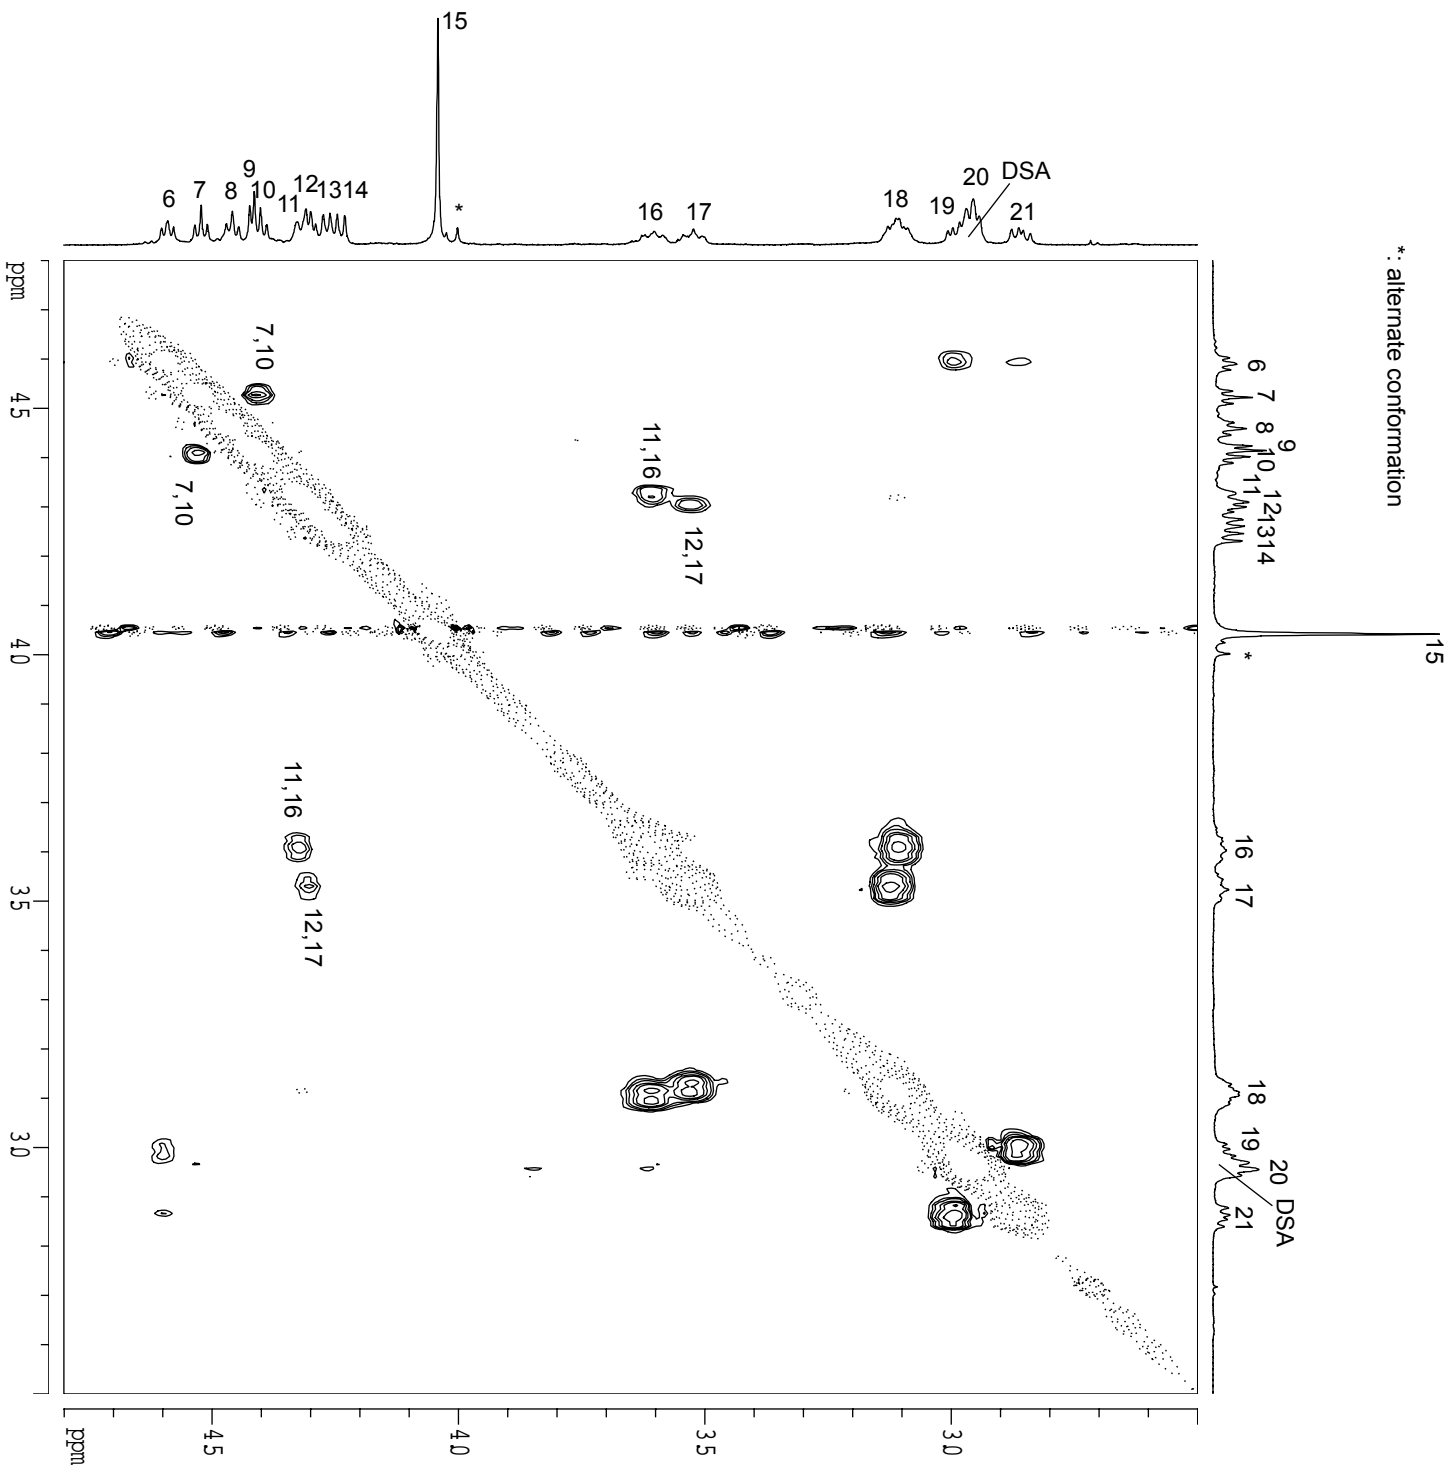

Supplement: ja110545h_si_001.pdf [file ja110545h_si_001.pdf]
